# Supplementary material for: Thiourea Organocatalysts as Emerging Chiral Pollutants: En Route to Porphyrin-Based (Chir)Optical Sensing
Source: MDPI journal article supplement (doi:10.3390/chemosensors9100278), 2021-09-29
Supplement: s1 [file s1]

## ***Supplementary Material***

# **Thiourea organocatalysts as emerging chiral pollutants: en route to porphyrin-based (chir)optical sensing**

Nele Konrad, Matvey Horetski, Mariliis Sihtmäe, Khai-Nghi Truong, Irina Osadchuk, Tatsiana Burankova, Marc Kielmann, Jasper Adamson, Anne Kahru, Kari Rissanen, Mathias O. Senge, Victor Borovkov \*, Riina Aav \* and Dzmitry Kananovich \*

## **Contents**

|                                                                                                                 |     |
|-----------------------------------------------------------------------------------------------------------------|-----|
| 1. Spectroscopic UV-Vis titrations and CD spectra .....                                                         | 2   |
| 2. UV-Vis and CD spectra of compound <b>1a</b> .....                                                            | 75  |
| 3. NSD distortion analysis for the porphyrin core in <b>1b·P5</b> complex.....                                  | 76  |
| 4. Determination of dimerization constants for <b>1a</b> and <b>1c</b> by <sup>1</sup> H NMR spectroscopy ..... | 79  |
| 5. Computational studies .....                                                                                  | 83  |
| 6. Cartesian coordinates.....                                                                                   | 99  |
| 7. References .....                                                                                             | 105 |

## 1. Spectroscopic UV-Vis titrations and CD spectra

The details of UV-Vis spectroscopic titrations and characterization of UV-Vis and CD spectra for the complexes of zinc porphyrins **P1–P9** and thioureas **1a–d**. Complexation of **1a–c** with ZnTPP (**P3**) has been previously described [1].

### Spectroscopic data of system **1a** + **P1**

**Table S1.** Absorptions (AU) of **P1** ( $2.0 \times 10^{-6}$  M) derived from the UV-Vis titration of **P1** with **1a** in  $\text{CH}_2\text{Cl}_2$  and concentrations of **1a** at 293 K.

| Sample no | AU 419.4 nm | AU 430.4 nm | $C_{1a}$ , M         |
|-----------|-------------|-------------|----------------------|
| 1         | 1.086       | 0.167       | 0,00                 |
| 2         | 1.063       | 0.188       | $3.02 \cdot 10^{-5}$ |
| 3         | 1.046       | 0.213       | $6.02 \cdot 10^{-5}$ |
| 4         | 1.024       | 0.230       | $9.02 \cdot 10^{-5}$ |
| 5         | 1.005       | 0.252       | $1.20 \cdot 10^{-4}$ |
| 6         | 0.968       | 0.283       | $1.80 \cdot 10^{-4}$ |
| 7         | 0.933       | 0.326       | $2.39 \cdot 10^{-4}$ |
| 8         | 0.898       | 0.363       | $2.98 \cdot 10^{-4}$ |
| 9         | 0.867       | 0.395       | $3.57 \cdot 10^{-4}$ |
| 10        | 0.835       | 0.431       | $4.16 \cdot 10^{-4}$ |
| 11        | 0.807       | 0.459       | $4.74 \cdot 10^{-4}$ |
| 12        | 0.780       | 0.486       | $5.32 \cdot 10^{-4}$ |
| 13        | 0.759       | 0.511       | $5.90 \cdot 10^{-4}$ |
| 14        | 0.736       | 0.534       | $6.47 \cdot 10^{-4}$ |
| 15        | 0.724       | 0.547       | $7.04 \cdot 10^{-4}$ |

|    |       |       |                      |
|----|-------|-------|----------------------|
| 16 | 0.700 | 0.574 | $7.61 \cdot 10^{-4}$ |
| 17 | 0.680 | 0.594 | $8.18 \cdot 10^{-4}$ |
| 18 | 0.663 | 0.612 | $8.74 \cdot 10^{-4}$ |
| 19 | 0.648 | 0.628 | $9.31 \cdot 10^{-4}$ |
| 20 | 0.618 | 0.661 | $1.04 \cdot 10^{-3}$ |
| 21 | 0.593 | 0.689 | $1.15 \cdot 10^{-3}$ |
| 22 | 0.563 | 0.721 | $1.32 \cdot 10^{-3}$ |
| 23 | 0.535 | 0.753 | $1.48 \cdot 10^{-3}$ |
| 24 | 0.504 | 0.786 | $1.69 \cdot 10^{-3}$ |
| 25 | 0.480 | 0.814 | $1.90 \cdot 10^{-3}$ |
| 26 | 0.459 | 0.838 | $2.10 \cdot 10^{-3}$ |
| 27 | 0.439 | 0.861 | $2.31 \cdot 10^{-3}$ |
| 28 | 0.412 | 0.893 | $2.70 \cdot 10^{-3}$ |
| 29 | 0.381 | 0.926 | $3.26 \cdot 10^{-3}$ |
| 30 | 0.357 | 0.958 | $3.89 \cdot 10^{-3}$ |
| 31 | 0.334 | 0.988 | $4.64 \cdot 10^{-3}$ |
| 32 | 0.319 | 1.007 | $5.34 \cdot 10^{-3}$ |
| 33 | 0.307 | 1.024 | $5.99 \cdot 10^{-3}$ |
| 34 | 0.299 | 1.037 | $6.61 \cdot 10^{-3}$ |
| 35 | 0.293 | 1.047 | $7.18 \cdot 10^{-3}$ |
| 36 | 0.287 | 1.060 | $7.72 \cdot 10^{-3}$ |
| 37 | 0.898 | 0.363 | $7.72 \cdot 10^{-3}$ |

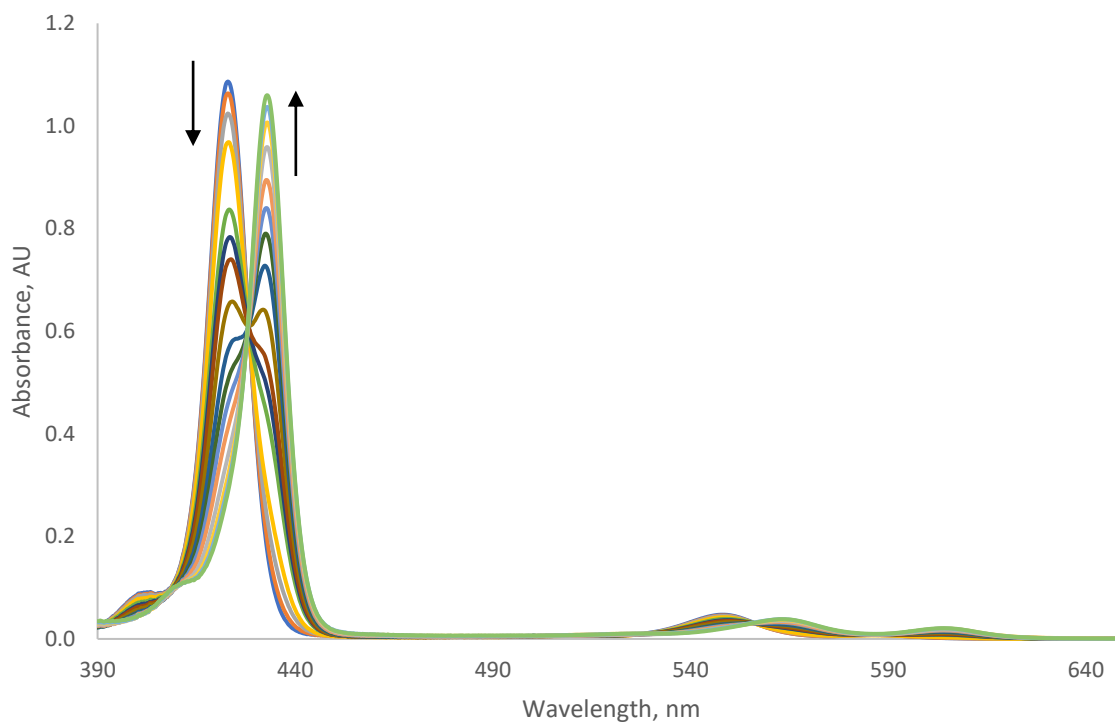

**Figure S1.** Changes in UV-Vis spectrum of **P1** ( $2.0 \times 10^{-6}$  M,  $\text{CH}_2\text{Cl}_2$ , 293 K) caused by portion-wise addition of guest **1a** ( $0-7.72 \cdot 10^{-3}$  M).

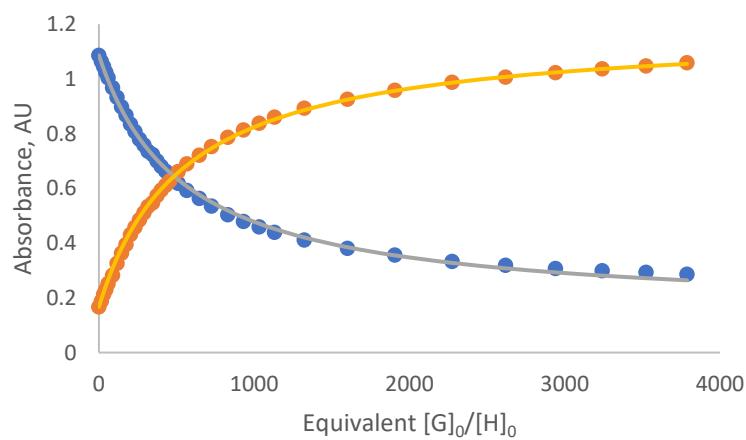

**Figure S2.** UV-Vis experimental (points) and 1:1 fitted (line) titration curves of **P1** and **1a** in  $\text{CH}_2\text{Cl}_2$ .  $[\text{G}]_0/[\text{H}]_0$  defines the ratio of **1a** guest and **P1** host. Blue points – absorption at 419.4 nm, orange points – absorption at 430.4 nm.



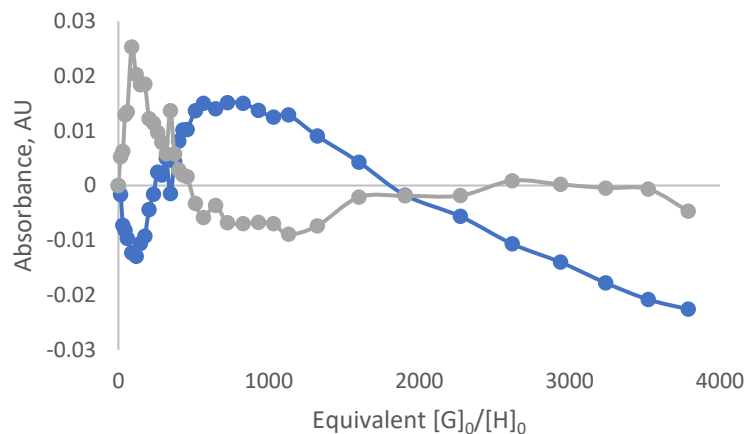

**Figure S3.** Residual analysis of UV-Vis titration between **P1** and **1a** in CH<sub>2</sub>Cl<sub>2</sub> using 1:1 model. [G]<sub>0</sub>/[H]<sub>0</sub> defines the ratio of **1a** guest and **P1** host. Blue points – absorption at 419.4 nm, grey points – absorption at 430.4 nm.

$$K_a (\mathbf{1a} + \mathbf{P1}) = (9.0 \pm 0.1) \times 10^2 \text{ M}^{-1}$$

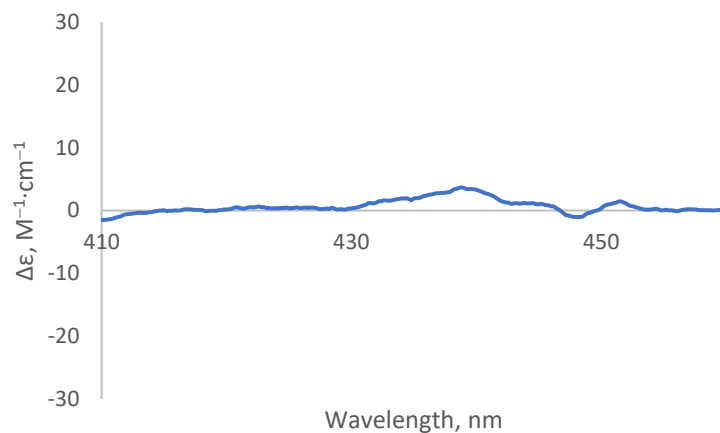

**Figure S4.** Experimental CD spectrum generated by mixing **P1** ( $2.0 \cdot 10^{-6}$  M, CH<sub>2</sub>Cl<sub>2</sub>, 293 K) and **1a** ( $7.6 \cdot 10^{-3}$  M), 91% conversion to complex.

### Spectroscopic data of system **1a** + **P2**

**Table S2.** Absorptions (AU) of **P2** ( $2.0 \times 10^{-6}$  M) derived from the UV-Vis titration of **P2** with **1a** in  $\text{CH}_2\text{Cl}_2$  and concentrations of **1a** at 293 K.

| Sample no | AU 422.6 nm | AU 432.4 nm | $C_{1a}$ , M         |
|-----------|-------------|-------------|----------------------|
| 1         | 1.110       | 0.160       | 0.00                 |
| 2         | 1.025       | 0.250       | $5.34 \cdot 10^{-5}$ |
| 3         | 0.953       | 0.328       | $1.07 \cdot 10^{-4}$ |
| 4         | 0.888       | 0.395       | $1.60 \cdot 10^{-4}$ |
| 5         | 0.835       | 0.452       | $2.12 \cdot 10^{-4}$ |
| 6         | 0.790       | 0.498       | $2.65 \cdot 10^{-4}$ |
| 7         | 0.751       | 0.540       | $3.17 \cdot 10^{-4}$ |
| 8         | 0.717       | 0.578       | $3.69 \cdot 10^{-4}$ |
| 9         | 0.685       | 0.608       | $4.20 \cdot 10^{-4}$ |
| 10        | 0.658       | 0.635       | $4.72 \cdot 10^{-4}$ |
| 11        | 0.634       | 0.659       | $5.23 \cdot 10^{-4}$ |
| 12        | 0.611       | 0.680       | $5.74 \cdot 10^{-4}$ |
| 13        | 0.591       | 0.701       | $6.25 \cdot 10^{-4}$ |
| 14        | 0.574       | 0.720       | $6.75 \cdot 10^{-4}$ |
| 15        | 0.556       | 0.739       | $7.26 \cdot 10^{-4}$ |
| 16        | 0.541       | 0.754       | $7.76 \cdot 10^{-4}$ |
| 17        | 0.528       | 0.765       | $8.25 \cdot 10^{-4}$ |
| 18        | 0.504       | 0.790       | $9.24 \cdot 10^{-4}$ |
| 19        | 0.483       | 0.809       | $1.02 \cdot 10^{-3}$ |

|    |       |       |                      |
|----|-------|-------|----------------------|
| 20 | 0.465 | 0.830 | $1.12 \cdot 10^{-3}$ |
| 21 | 0.443 | 0.854 | $1.26 \cdot 10^{-3}$ |
| 22 | 0.420 | 0.879 | $1.45 \cdot 10^{-3}$ |
| 23 | 0.399 | 0.901 | $1.64 \cdot 10^{-3}$ |
| 24 | 0.376 | 0.927 | $1.91 \cdot 10^{-3}$ |
| 25 | 0.353 | 0.953 | $2.26 \cdot 10^{-3}$ |
| 26 | 0.335 | 0.973 | $2.65 \cdot 10^{-3}$ |
| 27 | 0.319 | 0.992 | $3.05 \cdot 10^{-3}$ |
| 28 | 0.308 | 1.005 | $3.45 \cdot 10^{-3}$ |
| 29 | 0.299 | 1.017 | $3.82 \cdot 10^{-3}$ |
| 30 | 0.292 | 1.027 | $4.19 \cdot 10^{-3}$ |
| 31 | 0.284 | 1.042 | $4.80 \cdot 10^{-3}$ |

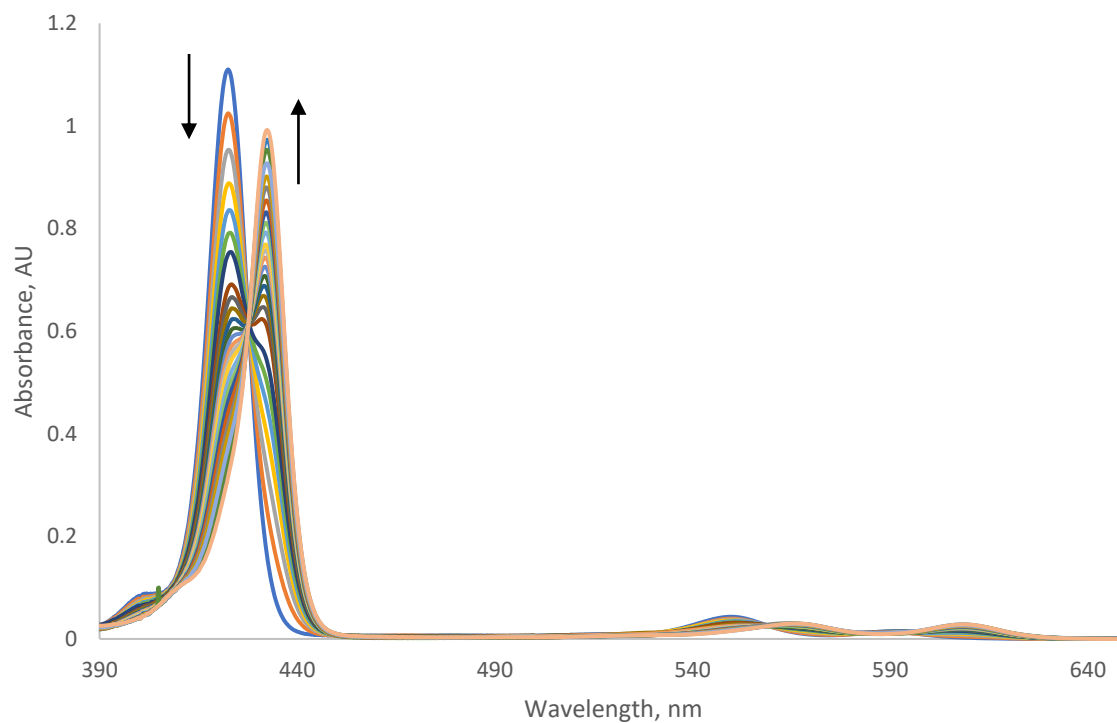

**Figure S5.** Changes in UV-Vis spectrum of **P2** ( $2.0 \times 10^{-6}$  M,  $\text{CH}_2\text{Cl}_2$ , 293 K) caused by portion-wise addition of guest **1a** ( $0$ – $4.80 \cdot 10^{-3}$  M).

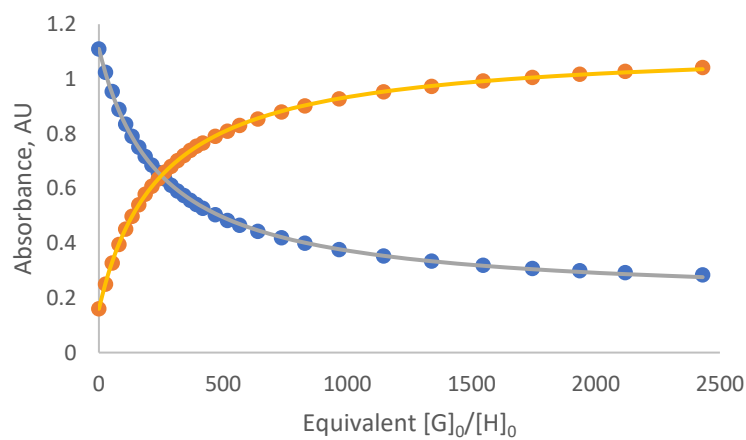

**Figure S6.** UV-Vis experimental (points) and 1:1 fitted (line) titration curves of **P2** and **1a** in  $\text{CH}_2\text{Cl}_2$ .  $[\text{G}]_0/[\text{H}]_0$  defines the ratio of **1a** guest and **P2** host. Blue points – absorption at 422.6 nm, orange points – absorption at 432.4 nm.

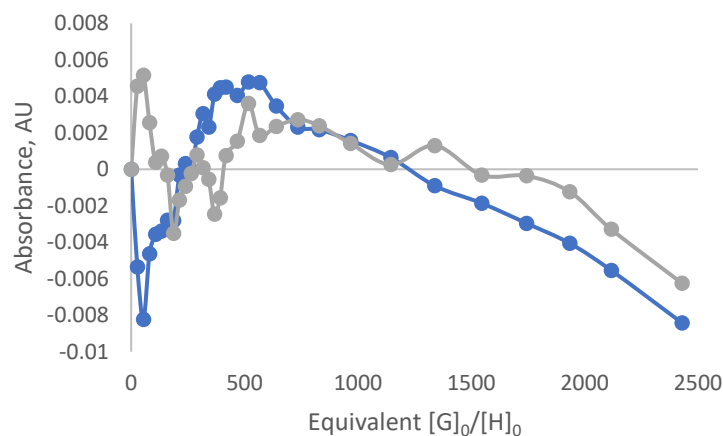

**Figure S7.** Residual analysis of UV-Vis titration between **P2** and **1a** in CH<sub>2</sub>Cl<sub>2</sub> using 1:1 model. [G]<sub>0</sub>/[H]<sub>0</sub> defines the ratio of **1a** guest and **P2** host. Blue points – absorption at 422.6 nm, grey points – absorption at 432.4 nm.

$$K_a (\mathbf{1a} + \mathbf{P2}) = (2.05 \pm 0.01) \times 10^3 \text{ M}^{-1}$$

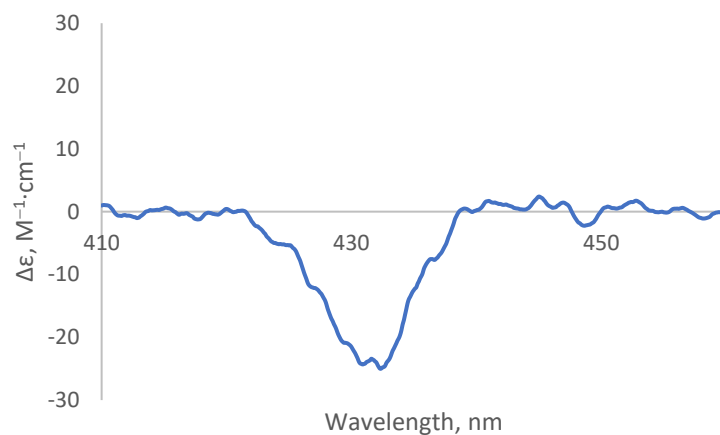

**Figure S8.** Experimental CD spectrum generated by mixing **P2** ( $2.0 \cdot 10^{-6}$  M, CH<sub>2</sub>Cl<sub>2</sub>, 293 K) and **1a** ( $4.8 \cdot 10^{-3}$  M), 91% conversion to complex.

### Spectroscopic data of system **1a** + **P4**

**Table S3.** Absorptions (AU) of **P4** ( $2.2 \times 10^{-6}$  M) derived from the UV-Vis titration of **P4** with **1a** in  $\text{CH}_2\text{Cl}_2$  and concentrations of **1a** at 293 K.

| Sample no | AU 418.0 nm | AU 428.6 nm | $C_{1a}$ , M         |
|-----------|-------------|-------------|----------------------|
| 1         | 1.080       | 0.090       | 0.00                 |
| 2         | 0.847       | 0.336       | $1.20 \cdot 10^{-4}$ |
| 3         | 0.781       | 0.403       | $1.79 \cdot 10^{-4}$ |
| 4         | 0.704       | 0.479       | $2.38 \cdot 10^{-4}$ |
| 5         | 0.647       | 0.541       | $2.97 \cdot 10^{-4}$ |
| 6         | 0.592       | 0.585       | $3.55 \cdot 10^{-4}$ |
| 7         | 0.561       | 0.627       | $4.14 \cdot 10^{-4}$ |
| 8         | 0.533       | 0.657       | $4.72 \cdot 10^{-4}$ |
| 9         | 0.507       | 0.684       | $5.29 \cdot 10^{-4}$ |
| 10        | 0.485       | 0.705       | $5.87 \cdot 10^{-4}$ |
| 11        | 0.467       | 0.724       | $6.44 \cdot 10^{-4}$ |
| 12        | 0.450       | 0.741       | $7.01 \cdot 10^{-4}$ |
| 13        | 0.436       | 0.754       | $7.58 \cdot 10^{-4}$ |
| 14        | 0.424       | 0.766       | $8.14 \cdot 10^{-4}$ |
| 15        | 0.413       | 0.778       | $8.70 \cdot 10^{-4}$ |
| 16        | 0.395       | 0.796       | $9.82 \cdot 10^{-4}$ |
| 17        | 0.380       | 0.811       | $1.09 \cdot 10^{-3}$ |
| 18        | 0.359       | 0.834       | $1.31 \cdot 10^{-3}$ |
| 19        | 0.336       | 0.859       | $1.63 \cdot 10^{-3}$ |

|    |       |       |                      |
|----|-------|-------|----------------------|
| 20 | 0.317 | 0.883 | $2.04 \cdot 10^{-3}$ |
| 21 | 0.304 | 0.900 | $2.49 \cdot 10^{-3}$ |
| 22 | 0.290 | 0.922 | $3.34 \cdot 10^{-3}$ |
| 23 | 0.280 | 0.925 | $4.12 \cdot 10^{-3}$ |

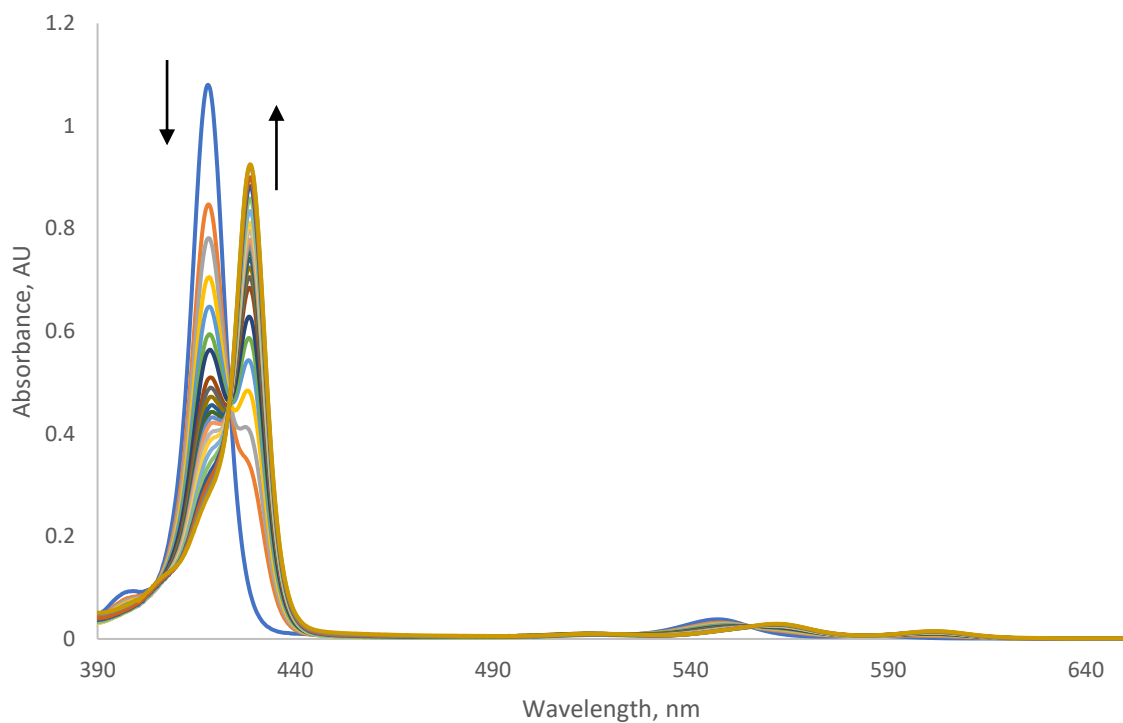

**Figure S9.** Changes in UV-Vis spectrum of **P4** ( $2.2 \times 10^{-6}$  M,  $\text{CH}_2\text{Cl}_2$ , 293 K) caused by portion-wise addition of guest **1a** ( $0$ – $4.12 \cdot 10^{-3}$  M).

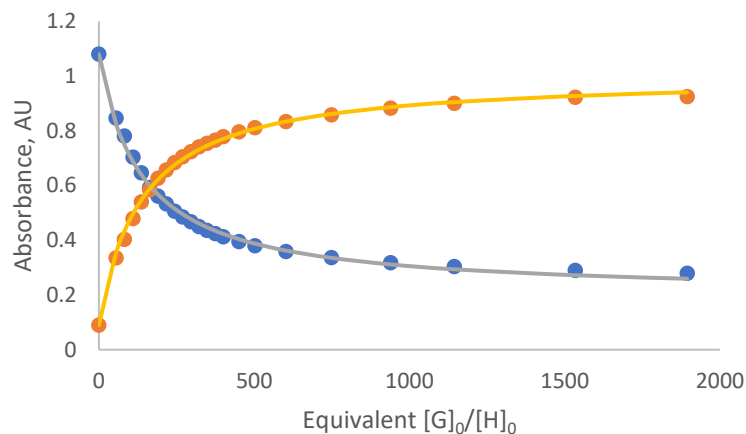

**Figure S10.** UV-Vis experimental (points) and 1:1 fitted (line) titration curves of **P4** and **1a** in  $\text{CH}_2\text{Cl}_2$ .  $[\text{G}]_0/[\text{H}]_0$  defines the ratio of **1a** guest and **P4** host. Blue points – absorption at 418.0 nm, orange points – absorption at 428.6 nm.

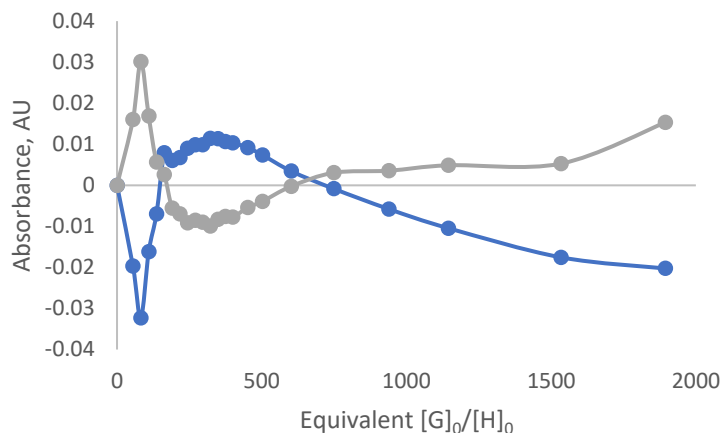

**Figure S11.** Residual analysis of UV-Vis titration between **P4** and **1a** in  $\text{CH}_2\text{Cl}_2$  using 1:1 model.  $[\text{G}]_0/[\text{H}]_0$  defines the ratio of **1a** guest and **P4** host. Blue points – absorption at 418.0 nm, grey points – absorption at 428.6 nm.

$$K_a (\mathbf{1a} + \mathbf{P4}) = (2.30 \pm 0.04) \times 10^3 \text{ M}^{-1}$$



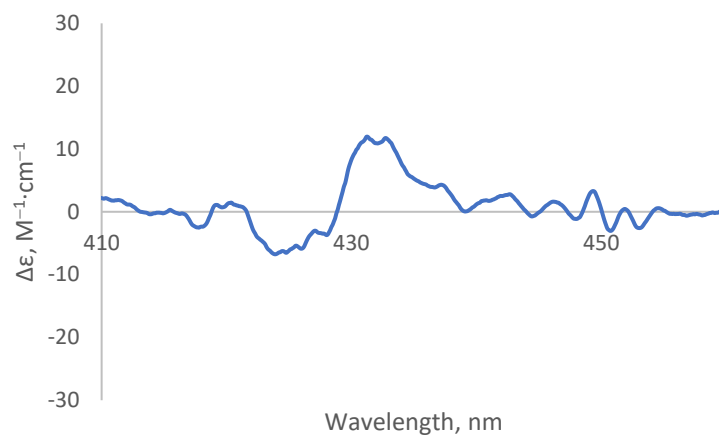

**Figure S12.** Experimental CD spectrum generated by mixing **P4** ( $2.1 \cdot 10^{-6}$  M,  $\text{CH}_2\text{Cl}_2$ , 293 K) and **1a** ( $4.3 \cdot 10^{-3}$  M), 94% conversion to complex.

#### Spectroscopic data of system **1a** + **P5**

**Table S4.** Absorptions (AU) of **P5** ( $2.2 \cdot 10^{-6}$  M) derived from the UV-Vis titration of **P5** with **1a** in  $\text{CH}_2\text{Cl}_2$  and concentrations of **1a** at 293 K.

| Sample no | AU 419.4 nm | AU 430.0 nm | $C_{1a}$ , M         |
|-----------|-------------|-------------|----------------------|
| 1         | 1.299       | 0.120       | 0.00                 |
| 2         | 1.097       | 0.334       | $5.45 \cdot 10^{-5}$ |
| 3         | 0.943       | 0.492       | $1.09 \cdot 10^{-4}$ |
| 4         | 0.831       | 0.608       | $1.63 \cdot 10^{-4}$ |
| 5         | 0.742       | 0.699       | $2.17 \cdot 10^{-4}$ |
| 6         | 0.674       | 0.767       | $2.70 \cdot 10^{-4}$ |
| 7         | 0.618       | 0.824       | $3.23 \cdot 10^{-4}$ |
| 8         | 0.573       | 0.869       | $3.76 \cdot 10^{-4}$ |
| 9         | 0.536       | 0.906       | $4.29 \cdot 10^{-4}$ |
| 10        | 0.504       | 0.938       | $4.81 \cdot 10^{-4}$ |

|    |       |       |                      |
|----|-------|-------|----------------------|
| 11 | 0.477 | 0.966 | $5.34 \cdot 10^{-4}$ |
| 12 | 0.454 | 0.989 | $5.86 \cdot 10^{-4}$ |
| 13 | 0.433 | 1.011 | $6.37 \cdot 10^{-4}$ |
| 14 | 0.416 | 1.029 | $6.89 \cdot 10^{-4}$ |
| 15 | 0.399 | 1.045 | $7.40 \cdot 10^{-4}$ |
| 16 | 0.384 | 1.060 | $7.91 \cdot 10^{-4}$ |
| 17 | 0.360 | 1.084 | $8.93 \cdot 10^{-4}$ |
| 18 | 0.342 | 1.105 | $9.93 \cdot 10^{-4}$ |
| 19 | 0.314 | 1.137 | $1.19 \cdot 10^{-3}$ |
| 20 | 0.287 | 1.171 | $1.48 \cdot 10^{-3}$ |
| 21 | 0.264 | 1.209 | $1.95 \cdot 10^{-3}$ |
| 22 | 0.242 | 1.258 | $2.83 \cdot 10^{-3}$ |

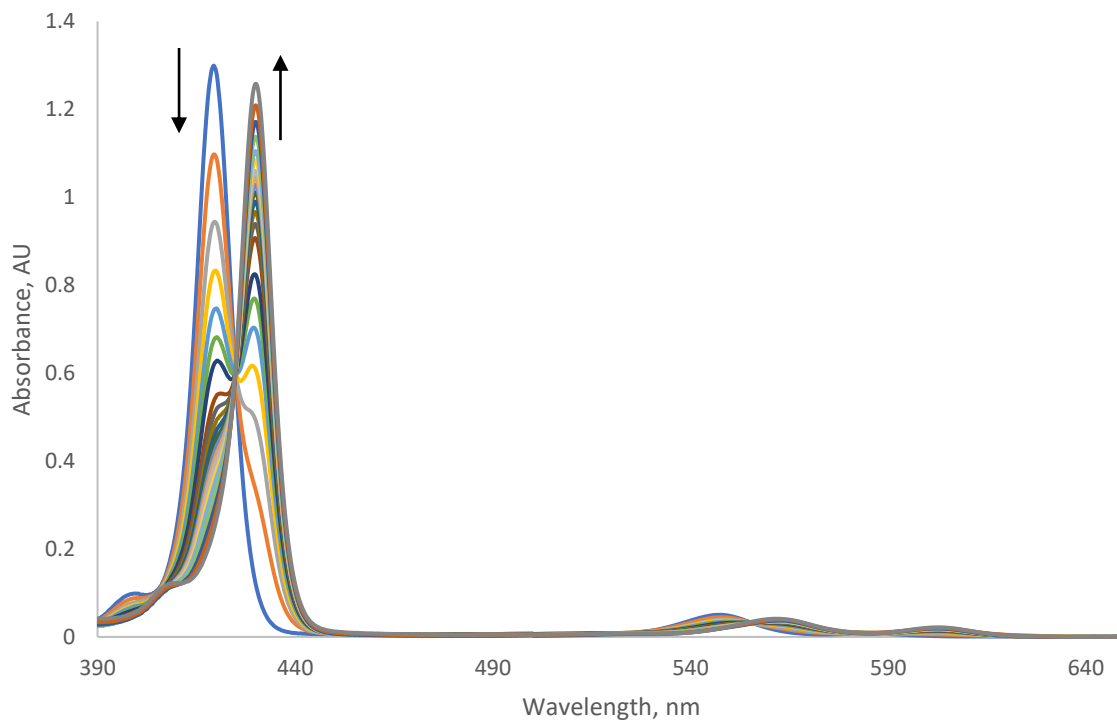

**Figure S13.** Changes in UV-Vis spectrum of **P5** ( $2.2 \times 10^{-6}$  M,  $\text{CH}_2\text{Cl}_2$ , 293 K) caused by portion-wise addition of guest **1a** ( $0$ – $2.83 \cdot 10^{-3}$  M).

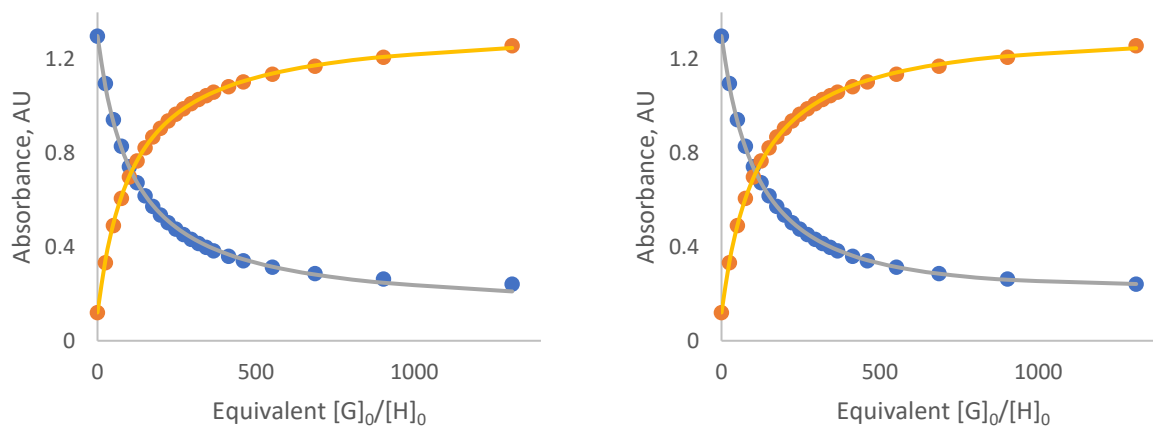

**Figure S14.** UV-Vis experimental (points) and 1:1 (left) and 1:2 (right) fitted (line) titration curves of **P5** and **1a** in  $\text{CH}_2\text{Cl}_2$ .  $[\text{G}]_0/[\text{H}]_0$  defines the ratio of **1a** guest and **P5** host. Blue points – absorbance at 419.4 nm, orange points – absorbance at 430.0 nm.

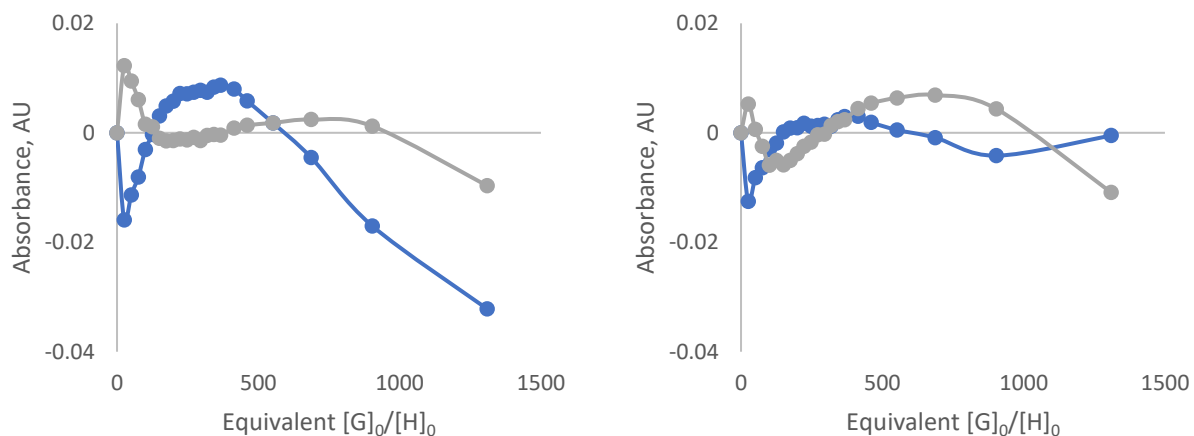

**Figure S15.** Residual analysis of UV-Vis titration between **P5** and **1a** in CH<sub>2</sub>Cl<sub>2</sub> using 1:1 (left) and 1:2 (right) model. [G]<sub>0</sub>/[H]<sub>0</sub> defines the ratio of **1a** guest and **P5** host. Blue points – absorption at 419.4 nm, grey points – absorption at 430.0 nm.

**Table S5.** 1:1 and 1:2 model fitting data comparison derived from the UV-Vis titration of **P5** with **1a** in CH<sub>2</sub>Cl<sub>2</sub> at 293 K.

| Fitting model | $K_a$ , M <sup>-1</sup>                                  | SSR fitting error   |
|---------------|----------------------------------------------------------|---------------------|
| 1:1           | $K_1 = (4.18 \pm 0.05) \times 10^3$                      | $2.8 \cdot 10^{-3}$ |
| 1:2           | $K_1 = (3.94 \pm 0.02) \times 10^3$<br>$K_2 = 50 \pm 10$ | $0.8 \cdot 10^{-3}$ |

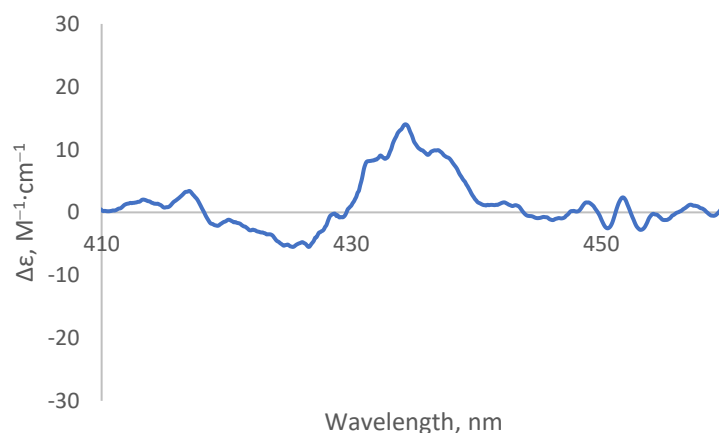

**Figure S16.** Experimental CD spectrum generated by mixing **P5** ( $2.2 \cdot 10^{-6}$  M, CH<sub>2</sub>Cl<sub>2</sub>, 293 K) and **1a** ( $4.3 \cdot 10^{-3}$  M), 91% conversion to complex.

### Spectroscopic data of system **1a** + **P6**

**Table S6.** Absorptions (AU) of **P6** ( $2.0 \times 10^{-6}$  M) derived from the UV-Vis titration of **P6** with **1a** in  $\text{CH}_2\text{Cl}_2$  and concentrations of **1a** at 293 K.

| Sample no | AU 417.8 nm | AU 429.2 nm | $C_{1a}$ , M         |
|-----------|-------------|-------------|----------------------|
| 1         | 1.257       | 0.092       | 0.00                 |
| 2         | 1.164       | 0.194       | $4.96 \cdot 10^{-5}$ |
| 3         | 1.082       | 0.283       | $9.90 \cdot 10^{-5}$ |
| 4         | 1.002       | 0.366       | $1.48 \cdot 10^{-4}$ |
| 5         | 0.936       | 0.436       | $1.97 \cdot 10^{-4}$ |
| 6         | 0.881       | 0.496       | $2.46 \cdot 10^{-4}$ |
| 7         | 0.828       | 0.551       | $2.94 \cdot 10^{-4}$ |
| 8         | 0.752       | 0.628       | $3.91 \cdot 10^{-4}$ |
| 9         | 0.685       | 0.696       | $4.86 \cdot 10^{-4}$ |
| 10        | 0.629       | 0.754       | $5.80 \cdot 10^{-4}$ |
| 11        | 0.585       | 0.797       | $6.74 \cdot 10^{-4}$ |
| 12        | 0.533       | 0.848       | $8.13 \cdot 10^{-4}$ |
| 13        | 0.503       | 0.878       | $9.04 \cdot 10^{-4}$ |
| 14        | 0.479       | 0.900       | $9.95 \cdot 10^{-4}$ |
| 15        | 0.456       | 0.926       | $1.08 \cdot 10^{-3}$ |
| 16        | 0.431       | 0.952       | $1.22 \cdot 10^{-3}$ |
| 17        | 0.404       | 0.980       | $1.39 \cdot 10^{-3}$ |
| 18        | 0.380       | 1.005       | $1.56 \cdot 10^{-3}$ |
| 19        | 0.356       | 1.028       | $1.78 \cdot 10^{-3}$ |

|    |       |       |                      |
|----|-------|-------|----------------------|
| 20 | 0.335 | 1.051 | $2.02 \cdot 10^{-3}$ |
| 21 | 0.319 | 1.069 | $2.26 \cdot 10^{-3}$ |
| 22 | 0.296 | 1.094 | $2.65 \cdot 10^{-3}$ |
| 23 | 0.269 | 1.125 | $3.38 \cdot 10^{-3}$ |
| 24 | 0.252 | 1.145 | $4.05 \cdot 10^{-3}$ |
| 25 | 0.241 | 1.162 | $4.67 \cdot 10^{-3}$ |
| 26 | 0.233 | 1.175 | $5.25 \cdot 10^{-3}$ |

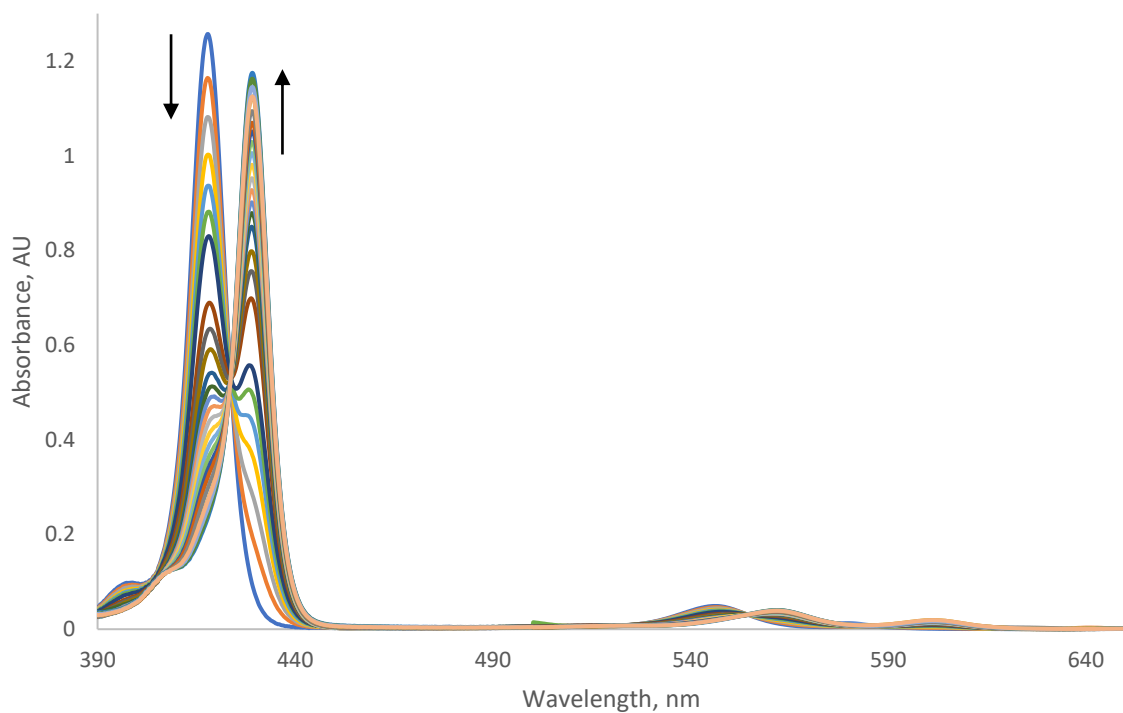

**Figure S17.** Changes in UV-Vis spectrum of **P6** ( $2.0 \times 10^{-6}$  M,  $\text{CH}_2\text{Cl}_2$ , 293 K) caused by portion-wise addition of guest **1a** ( $0$ – $5.25 \cdot 10^{-3}$  M).

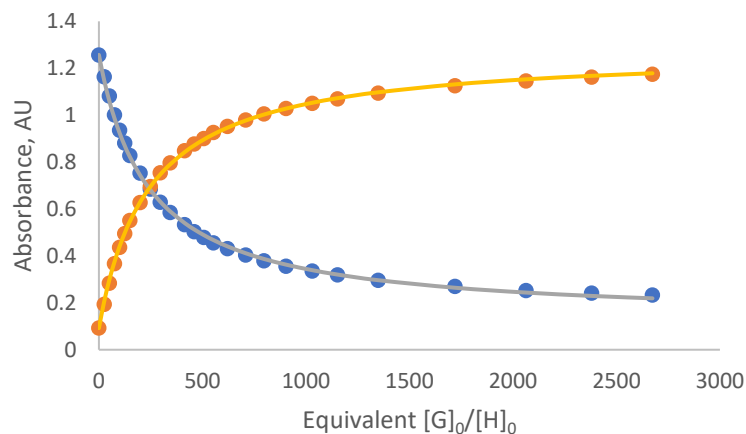

**Figure S18.** UV-Vis experimental (points) and 1:1 fitted (line) titration curves of **P6** and **1a** in  $\text{CH}_2\text{Cl}_2$ .  $[\text{G}]_0/[\text{H}]_0$  defines the ratio of **1a** guest and **P6** host. Blue points – absorption at 417.8 nm, orange points – absorption at 429.2 nm.

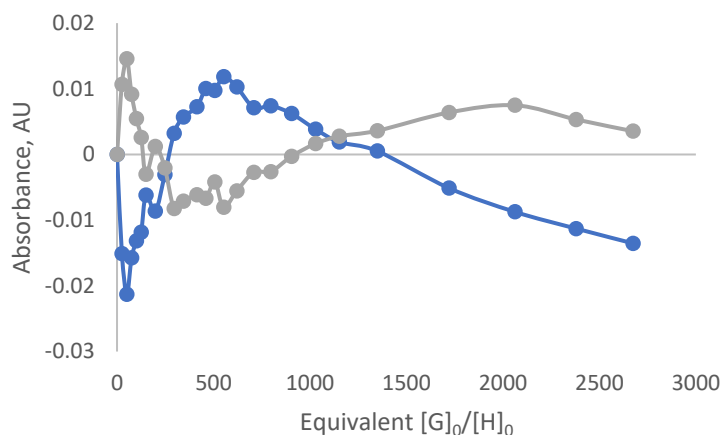

**Figure S19.** Residual analysis of UV-Vis titration between **P6** and **1a** in  $\text{CH}_2\text{Cl}_2$  using 1:1 model.  $[\text{G}]_0/[\text{H}]_0$  defines the ratio of **1a** guest and **P6** host. Blue points – absorption at 417.8 nm, grey points – absorption at 429.2 nm.

$$K_a (\mathbf{1a} + \mathbf{P6}) = (2.13 \pm 0.02) \times 10^3 \text{ M}^{-1}$$

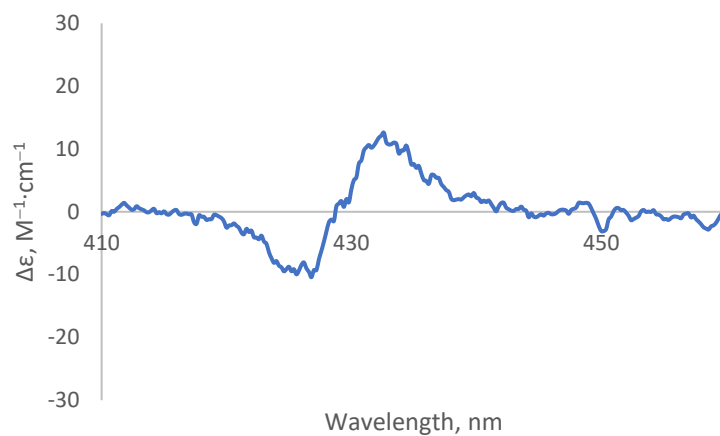

**Figure S20.** Experimental CD spectrum generated by mixing **P6** ( $2.0 \cdot 10^{-6}$  M,  $\text{CH}_2\text{Cl}_2$ , 293 K) and **1a** ( $5.3 \cdot 10^{-3}$  M), 92% conversion to complex.

#### Spectroscopic data of system **1a** + **P7**

**Table S7.** Absorptions (AU) of **P7** ( $2.1 \cdot 10^{-6}$  M) derived from the UV-Vis titration of **P7** with **1a** in  $\text{CH}_2\text{Cl}_2$  and concentrations of **1a** at 293 K.

| Sample no | AU 420.6 nm | AU 432.0 nm | $C_{1a}$ , M         |
|-----------|-------------|-------------|----------------------|
| 1         | 0.914       | 0.112       | 0.00                 |
| 2         | 0.829       | 0.197       | $9.26 \cdot 10^{-5}$ |
| 3         | 0.757       | 0.270       | $1.85 \cdot 10^{-4}$ |
| 4         | 0.693       | 0.333       | $2.77 \cdot 10^{-4}$ |
| 5         | 0.643       | 0.384       | $3.68 \cdot 10^{-4}$ |
| 6         | 0.596       | 0.428       | $4.59 \cdot 10^{-4}$ |
| 7         | 0.554       | 0.469       | $5.49 \cdot 10^{-4}$ |
| 8         | 0.491       | 0.532       | $7.29 \cdot 10^{-4}$ |
| 9         | 0.443       | 0.578       | $9.07 \cdot 10^{-4}$ |
| 10        | 0.407       | 0.614       | $1.08 \cdot 10^{-3}$ |



|    |       |       |                      |
|----|-------|-------|----------------------|
| 11 | 0.378 | 0.641 | $1.26 \cdot 10^{-3}$ |
| 12 | 0.352 | 0.667 | $1.43 \cdot 10^{-3}$ |
| 13 | 0.316 | 0.702 | $1.77 \cdot 10^{-3}$ |
| 14 | 0.289 | 0.729 | $2.11 \cdot 10^{-3}$ |
| 15 | 0.268 | 0.750 | $2.44 \cdot 10^{-3}$ |
| 16 | 0.234 | 0.780 | $3.08 \cdot 10^{-3}$ |
| 17 | 0.217 | 0.798 | $3.70 \cdot 10^{-3}$ |
| 18 | 0.205 | 0.812 | $4.30 \cdot 10^{-3}$ |
| 19 | 0.196 | 0.823 | $4.87 \cdot 10^{-3}$ |
| 20 | 0.183 | 0.836 | $5.97 \cdot 10^{-3}$ |
| 21 | 0.175 | 0.846 | $7.01 \cdot 10^{-3}$ |
| 22 | 0.170 | 0.852 | $7.98 \cdot 10^{-3}$ |
| 23 | 0.165 | 0.860 | $8.89 \cdot 10^{-3}$ |
| 24 | 0.160 | 0.863 | $9.75 \cdot 10^{-3}$ |
| 25 | 0.160 | 0.870 | $1.06 \cdot 10^{-2}$ |
| 26 | 0.157 | 0.872 | $1.13 \cdot 10^{-2}$ |
| 27 | 0.157 | 0.875 | $1.20 \cdot 10^{-2}$ |

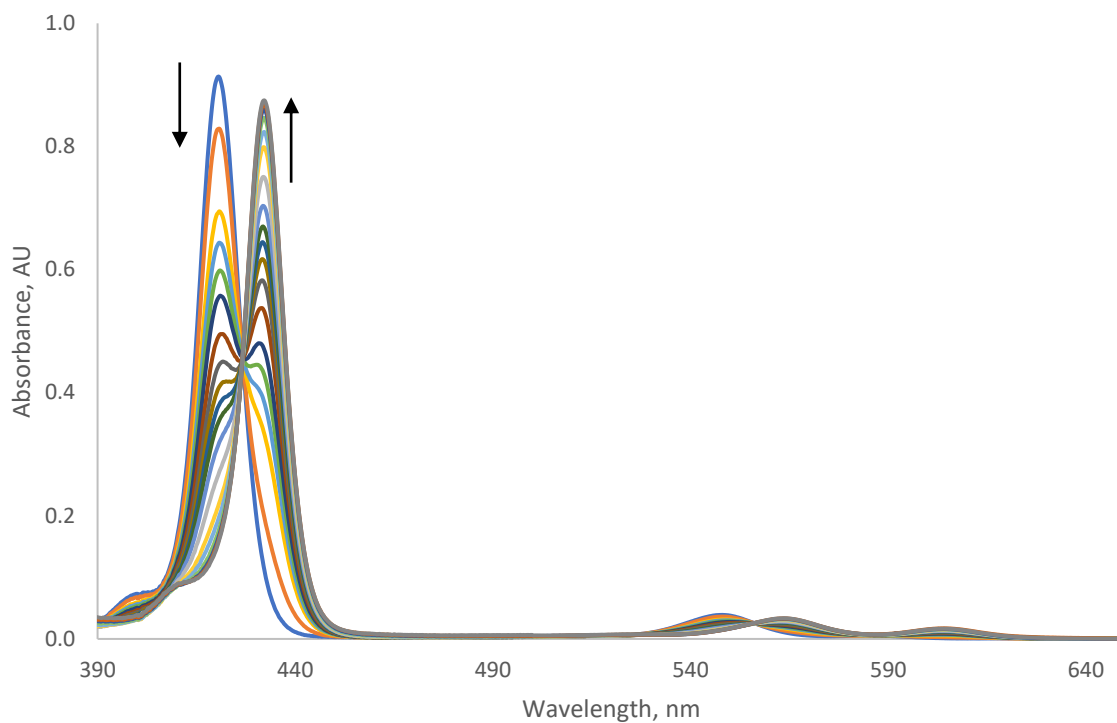

**Figure S21.** Changes in UV-Vis spectrum of **P7** ( $2.1 \times 10^{-6}$  M,  $\text{CH}_2\text{Cl}_2$ , 293 K) caused by portion-wise addition of guest **1a** ( $0$ – $1.2 \cdot 10^{-2}$  M).

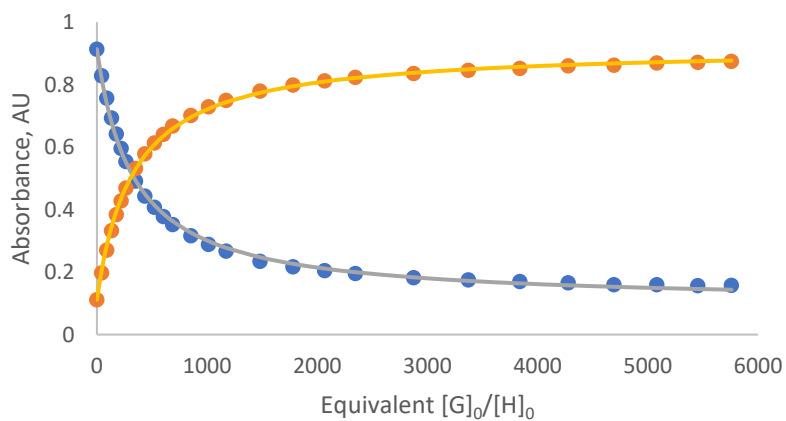

**Figure S22.** UV-Vis experimental (points) and 1:1 fitted (line) titration curves of **P7** and **1a** in  $\text{CH}_2\text{Cl}_2$ .  $[\text{G}]_0/[\text{H}]_0$  defines the ratio of **1a** guest and **P7** host. Blue points – absorbance at 420.6 nm, orange points – absorbance at 432.2 nm.

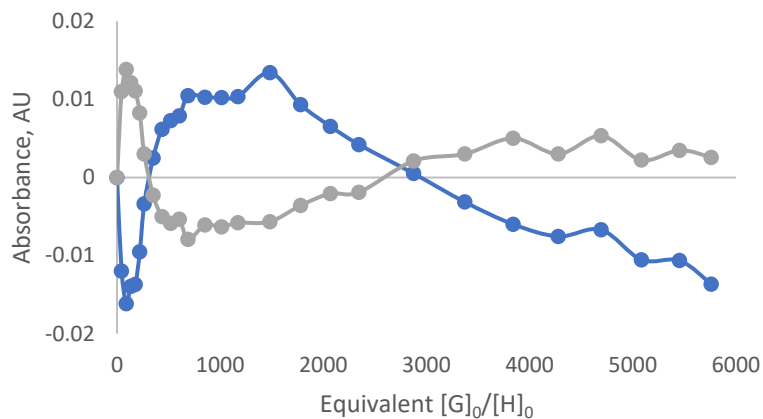

**Figure S23.** Residual analysis of UV-Vis titration between **P7** and **1a** in  $\text{CH}_2\text{Cl}_2$  using 1:1 model.  $[\text{G}]_0/[\text{H}]_0$  defines the ratio of **1a** guest and **P7** host. Blue points – absorption at 420.6 nm, grey points – absorption at 432.2 nm.

$$K_a (\mathbf{1a} + \mathbf{P7}) = (1.42 \pm 0.02) \times 10^3 \text{ M}^{-1}$$

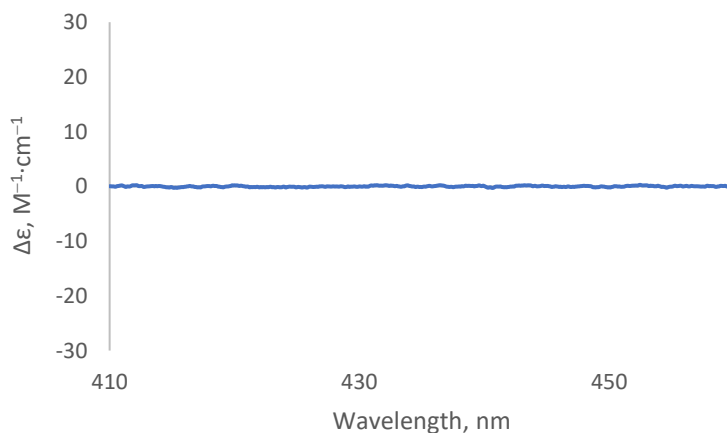

**Figure S24.** Experimental CD spectrum generated by mixing **P7** ( $1.9 \cdot 10^{-6} \text{ M}$ ,  $\text{CH}_2\text{Cl}_2$ , 293 K) and **1a** ( $2.4 \cdot 10^{-2} \text{ M}$ ), 99% conversion to complex.

### Spectroscopic data of system **1a** + **P8**

**Table S8.** Absorptions (AU) of **P8** ( $2.1 \times 10^{-6}$  M) derived from the UV-Vis titration of **P8** with **1a** in  $\text{CH}_2\text{Cl}_2$  and concentrations of **1a** at 293 K.

| Sample no | AU 412.6 nm | AU 425.0 nm | $C_{1a}$ , M         |
|-----------|-------------|-------------|----------------------|
| 1         | 0.960       | 0.054       | 0.00                 |
| 2         | 0.944       | 0.070       | $2.62 \cdot 10^{-6}$ |
| 3         | 0.921       | 0.099       | $5.22 \cdot 10^{-6}$ |
| 4         | 0.898       | 0.127       | $7.83 \cdot 10^{-6}$ |
| 5         | 0.874       | 0.153       | $1.04 \cdot 10^{-5}$ |
| 6         | 0.832       | 0.203       | $1.56 \cdot 10^{-5}$ |
| 7         | 0.791       | 0.248       | $2.07 \cdot 10^{-5}$ |
| 8         | 0.755       | 0.290       | $2.59 \cdot 10^{-5}$ |
| 9         | 0.722       | 0.327       | $3.10 \cdot 10^{-5}$ |
| 10        | 0.689       | 0.365       | $3.61 \cdot 10^{-5}$ |
| 11        | 0.661       | 0.395       | $4.11 \cdot 10^{-5}$ |
| 12        | 0.614       | 0.447       | $5.11 \cdot 10^{-5}$ |
| 13        | 0.571       | 0.496       | $6.11 \cdot 10^{-5}$ |
| 14        | 0.534       | 0.537       | $7.09 \cdot 10^{-5}$ |
| 15        | 0.491       | 0.583       | $8.56 \cdot 10^{-5}$ |
| 16        | 0.453       | 0.626       | $1.00 \cdot 10^{-4}$ |
| 17        | 0.413       | 0.669       | $1.19 \cdot 10^{-4}$ |
| 18        | 0.379       | 0.708       | $1.37 \cdot 10^{-4}$ |
| 19        | 0.353       | 0.736       | $1.56 \cdot 10^{-4}$ |

|    |       |       |                      |
|----|-------|-------|----------------------|
| 20 | 0.333 | 0.757 | $1.74 \cdot 10^{-4}$ |
| 21 | 0.298 | 0.794 | $2.09 \cdot 10^{-4}$ |
| 22 | 0.264 | 0.832 | $2.59 \cdot 10^{-4}$ |
| 23 | 0.234 | 0.864 | $3.29 \cdot 10^{-4}$ |
| 24 | 0.215 | 0.885 | $3.95 \cdot 10^{-4}$ |
| 25 | 0.200 | 0.899 | $4.56 \cdot 10^{-4}$ |
| 26 | 0.189 | 0.912 | $5.14 \cdot 10^{-4}$ |
| 27 | 0.182 | 0.919 | $5.67 \cdot 10^{-4}$ |

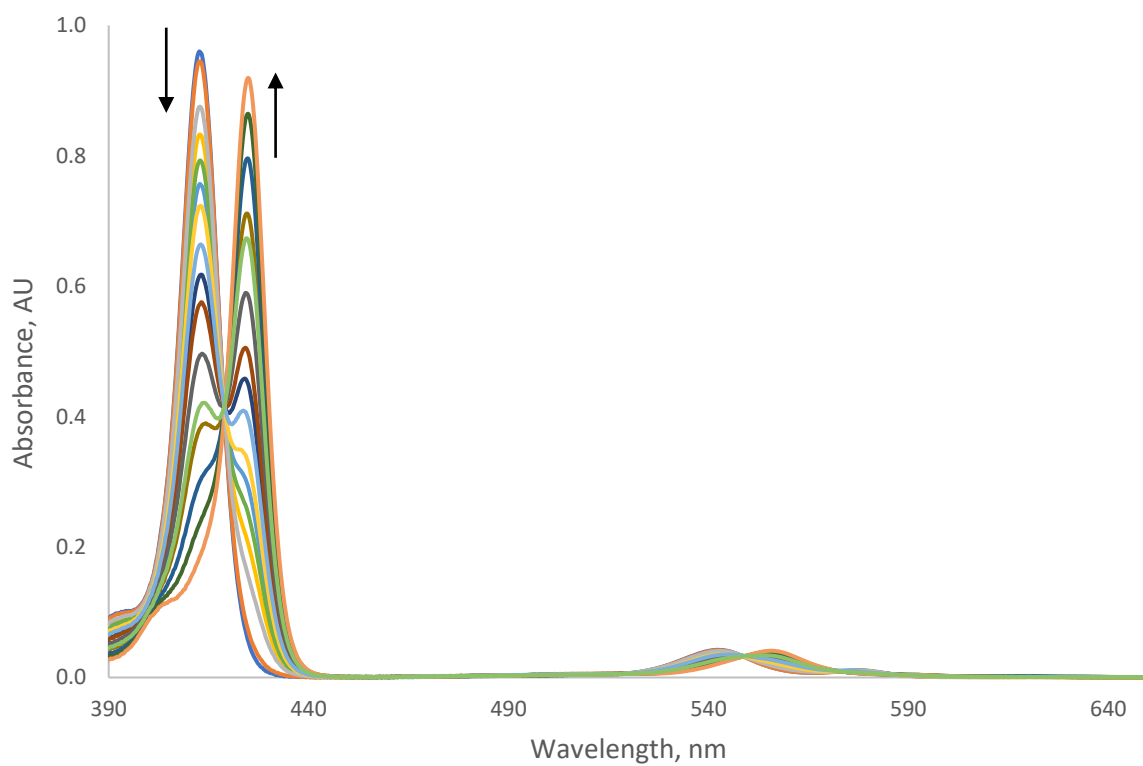

**Figure S25.** Changes in UV-Vis spectrum of **P8** ( $2.1 \times 10^{-6}$  M,  $\text{CH}_2\text{Cl}_2$ , 293 K) caused by portion-wise addition of guest **1a** ( $0$ – $5.67 \cdot 10^{-4}$  M).

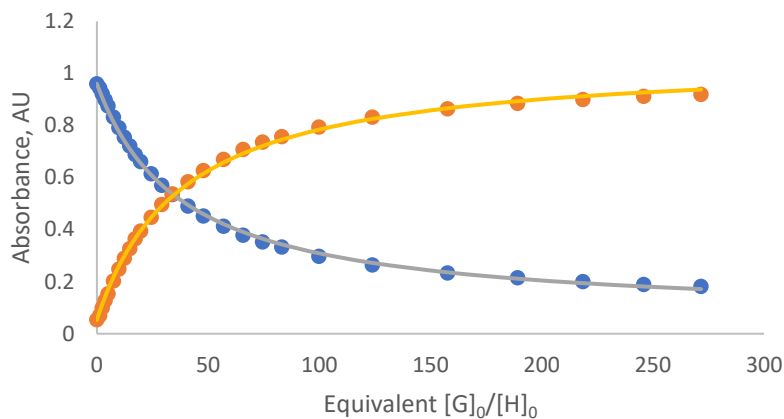

**Figure S26.** UV-Vis experimental (points) and 1:1 fitted (line) titration curves of **P8** and **1a** in CH<sub>2</sub>Cl<sub>2</sub>. [G]<sub>0</sub>/[H]<sub>0</sub> defines the ratio of **1a** guest and **P8** host. Blue points – absorption at 412.6 nm, orange points – absorption at 425.0 nm.

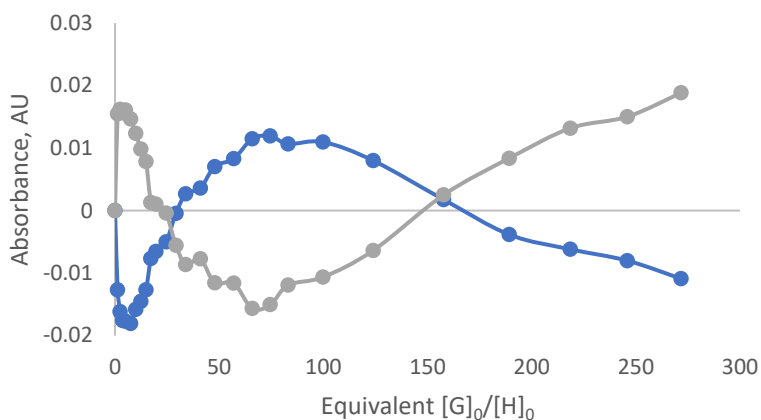

**Figure S27.** Residual analysis of UV-Vis titration between **P8** and **1a** in CH<sub>2</sub>Cl<sub>2</sub> using 1:1 model. [G]<sub>0</sub>/[H]<sub>0</sub> defines the ratio of **1a** guest and **P8** host. Blue points – absorption at 412.6 nm, grey points – absorption at 425.0 nm.

$$K_a (\mathbf{1a} + \mathbf{P8}) = (1.27 \pm 0.02) \times 10^4 \text{ M}^{-1}$$

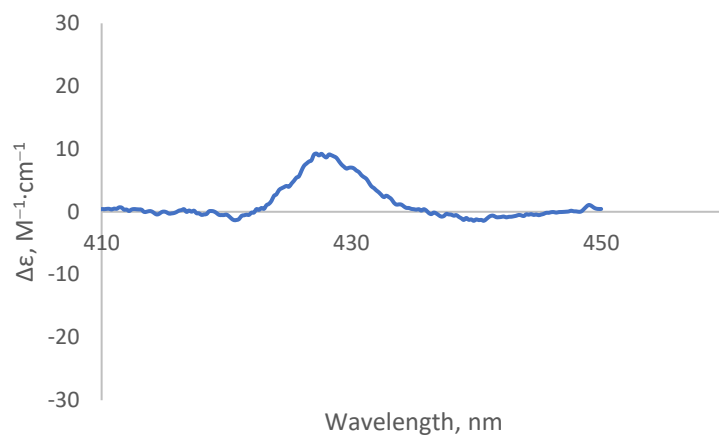

**Figure S28.** Experimental CD spectrum generated by mixing **P8** ( $2.1 \cdot 10^{-6}$  M,  $\text{CH}_2\text{Cl}_2$ , 293 K) and **1a** ( $1.0 \cdot 10^{-3}$  M), 93% conversion to complex

#### Spectroscopic data of system **1a** + **P9**

**Table S9.** Absorptions (AU) of **P9** ( $2.0 \times 10^{-6}$  M) derived from the UV-Vis titration of **P9** with **1a** in  $\text{CH}_2\text{Cl}_2$  and concentrations of **1a** at 293 K.

| Sample no | AU 456.8 nm | AU 470.0 nm | $C_{1a}$ , M         |
|-----------|-------------|-------------|----------------------|
| 1         | 0.391       | 0.248       | 0.00                 |
| 2         | 0.350       | 0.291       | $1.07 \cdot 10^{-6}$ |
| 3         | 0.326       | 0.312       | $2.14 \cdot 10^{-6}$ |
| 4         | 0.317       | 0.322       | $3.22 \cdot 10^{-6}$ |
| 5         | 0.308       | 0.331       | $4.29 \cdot 10^{-6}$ |
| 6         | 0.295       | 0.342       | $6.43 \cdot 10^{-6}$ |
| 7         | 0.285       | 0.353       | $8.57 \cdot 10^{-6}$ |
| 8         | 0.280       | 0.358       | $1.07 \cdot 10^{-5}$ |
| 9         | 0.271       | 0.365       | $1.60 \cdot 10^{-5}$ |
| 10        | 0.261       | 0.374       | $2.67 \cdot 10^{-5}$ |

|    |       |       |                      |
|----|-------|-------|----------------------|
| 11 | 0.255 | 0.377 | $3.72 \cdot 10^{-5}$ |
| 12 | 0.250 | 0.379 | $5.82 \cdot 10^{-5}$ |
| 13 | 0.246 | 0.379 | $8.94 \cdot 10^{-5}$ |
| 14 | 0.243 | 0.379 | $1.30 \cdot 10^{-4}$ |

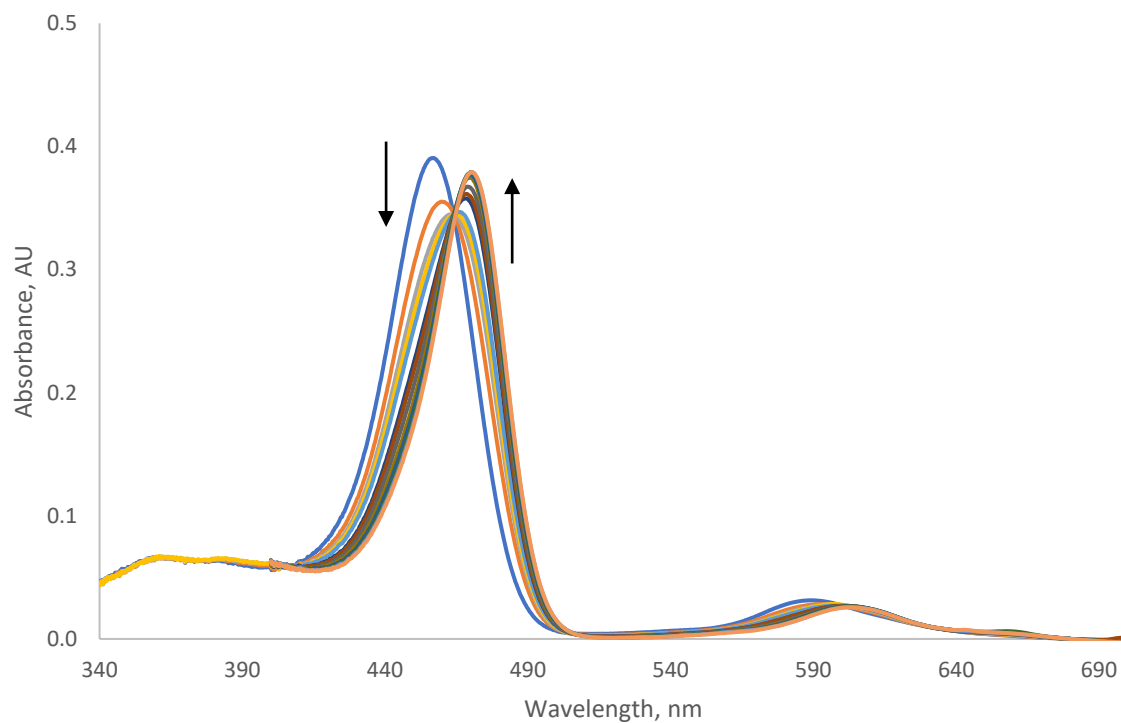

**Figure S29.** Changes in UV-Vis spectrum of **P9** ( $2.0 \times 10^{-6}$  M,  $\text{CH}_2\text{Cl}_2$ , 293 K) caused by portion-wise addition of guest **1a** ( $0$ – $1.30 \cdot 10^{-4}$  M).



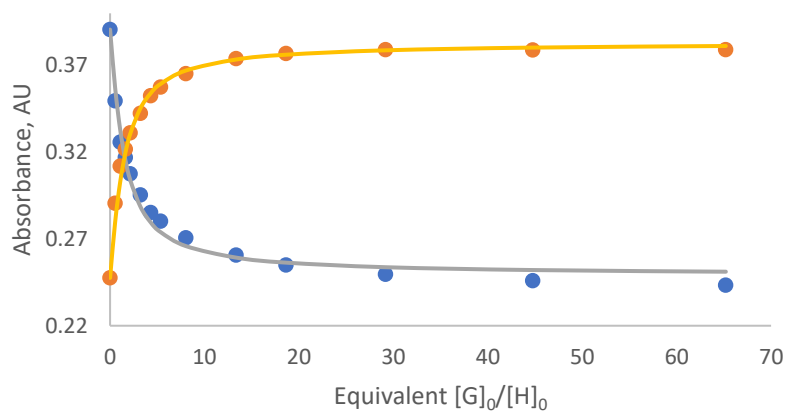

**Figure S30.** UV-Vis experimental (points) and 1:1 fitted (line) titration curves of **P9** and **1a** in CH<sub>2</sub>Cl<sub>2</sub>. [G]<sub>0</sub>/[H]<sub>0</sub> defines the ratio of **1a** guest and **P9** host. Blue points – absorption at 456.8 nm, orange points – absorption at 470.0 nm.

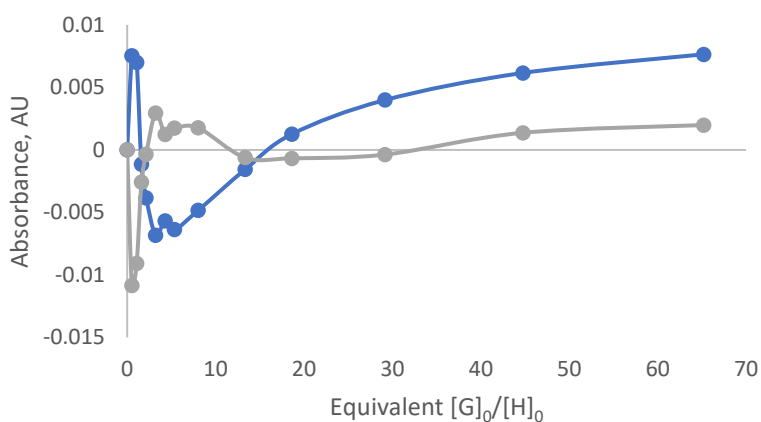

**Figure S31.** Residual analysis of UV-Vis titration between **P9** and **1a** in CH<sub>2</sub>Cl<sub>2</sub> using 1:1 model. [G]<sub>0</sub>/[H]<sub>0</sub> defines the ratio of **1a** guest and **P9** host. Blue points – absorption at 456.8 nm, grey points – absorption at 470.0 nm.

$$K_a (\mathbf{1a} + \mathbf{P9}) = (5.2 \pm 0.2) \times 10^5 \text{ M}^{-1}$$

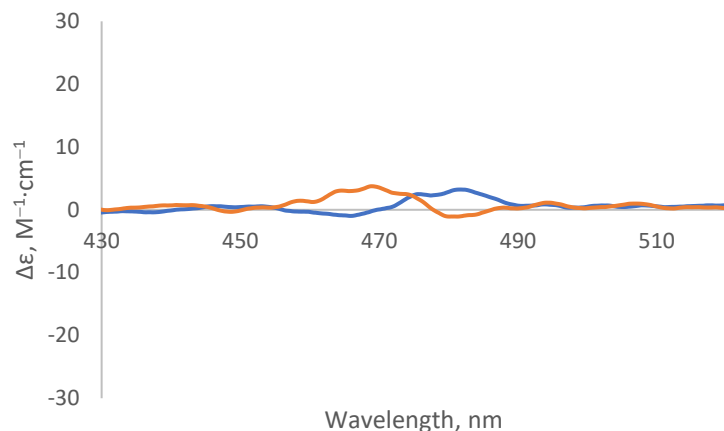

**Figure S32.** Experimental CD spectra generated by mixing host and guest. Blue line: **P9** ( $4.0 \cdot 10^{-6}$  M,  $\text{CH}_2\text{Cl}_2$ , 293 K) and (*R,R*)-**1a** ( $1.3 \cdot 10^{-4}$  M); orange line: **P9** ( $4.0 \cdot 10^{-6}$  M,  $\text{CH}_2\text{Cl}_2$ , 293 K) and (*S,S*)-**1a** ( $1.3 \cdot 10^{-4}$  M), >99% conversion to complex in both cases. Since the CD signal for complex (*R,R*)-**1a**·**P9** is small, complex (*S,S*)-**1a**·**P9** CD signal was measured for comparison.

#### Spectroscopic data of system **1b** + **P2**

**Table S10.** Absorptions (AU) of **P2** ( $2.0 \times 10^{-6}$  M) derived from the UV-Vis titration of **P2** with **1b** in  $\text{CH}_2\text{Cl}_2$  and concentrations of **1b** at 293 K.

| Sample no | AU 422.6 nm | AU 432.0 nm | $C_{1b}$ , M         |
|-----------|-------------|-------------|----------------------|
| 1         | 1.020       | 0.177       | 0.00                 |
| 2         | 0.967       | 0.233       | $2.24 \cdot 10^{-5}$ |
| 3         | 0.868       | 0.342       | $4.47 \cdot 10^{-5}$ |
| 4         | 0.804       | 0.408       | $6.69 \cdot 10^{-5}$ |
| 5         | 0.748       | 0.469       | $8.91 \cdot 10^{-5}$ |
| 6         | 0.705       | 0.514       | $1.11 \cdot 10^{-4}$ |
| 7         | 0.669       | 0.552       | $1.33 \cdot 10^{-4}$ |
| 8         | 0.633       | 0.591       | $1.55 \cdot 10^{-4}$ |
| 9         | 0.603       | 0.618       | $1.76 \cdot 10^{-4}$ |

|    |       |       |                      |
|----|-------|-------|----------------------|
| 10 | 0.570 | 0.655 | $1.98 \cdot 10^{-4}$ |
| 11 | 0.557 | 0.665 | $2.20 \cdot 10^{-4}$ |
| 12 | 0.533 | 0.692 | $2.41 \cdot 10^{-4}$ |
| 13 | 0.518 | 0.707 | $2.62 \cdot 10^{-4}$ |
| 14 | 0.503 | 0.723 | $2.83 \cdot 10^{-4}$ |
| 15 | 0.492 | 0.734 | $3.04 \cdot 10^{-4}$ |
| 16 | 0.479 | 0.746 | $3.25 \cdot 10^{-4}$ |
| 17 | 0.470 | 0.756 | $3.46 \cdot 10^{-4}$ |
| 18 | 0.461 | 0.766 | $3.67 \cdot 10^{-4}$ |
| 19 | 0.451 | 0.776 | $3.88 \cdot 10^{-4}$ |
| 20 | 0.443 | 0.784 | $4.09 \cdot 10^{-4}$ |
| 21 | 0.435 | 0.793 | $4.29 \cdot 10^{-4}$ |
| 22 | 0.421 | 0.806 | $4.70 \cdot 10^{-4}$ |
| 23 | 0.409 | 0.818 | $5.10 \cdot 10^{-4}$ |
| 24 | 0.395 | 0.837 | $5.50 \cdot 10^{-4}$ |
| 25 | 0.388 | 0.840 | $5.90 \cdot 10^{-4}$ |
| 26 | 0.379 | 0.852 | $6.29 \cdot 10^{-4}$ |
| 27 | 0.371 | 0.859 | $6.68 \cdot 10^{-4}$ |
| 28 | 0.363 | 0.868 | $7.07 \cdot 10^{-4}$ |
| 29 | 0.357 | 0.874 | $7.45 \cdot 10^{-4}$ |
| 30 | 0.351 | 0.880 | $7.83 \cdot 10^{-4}$ |
| 31 | 0.345 | 0.887 | $8.21 \cdot 10^{-4}$ |

|    |       |       |                      |
|----|-------|-------|----------------------|
| 32 | 0.338 | 0.892 | $8.58 \cdot 10^{-4}$ |
|----|-------|-------|----------------------|

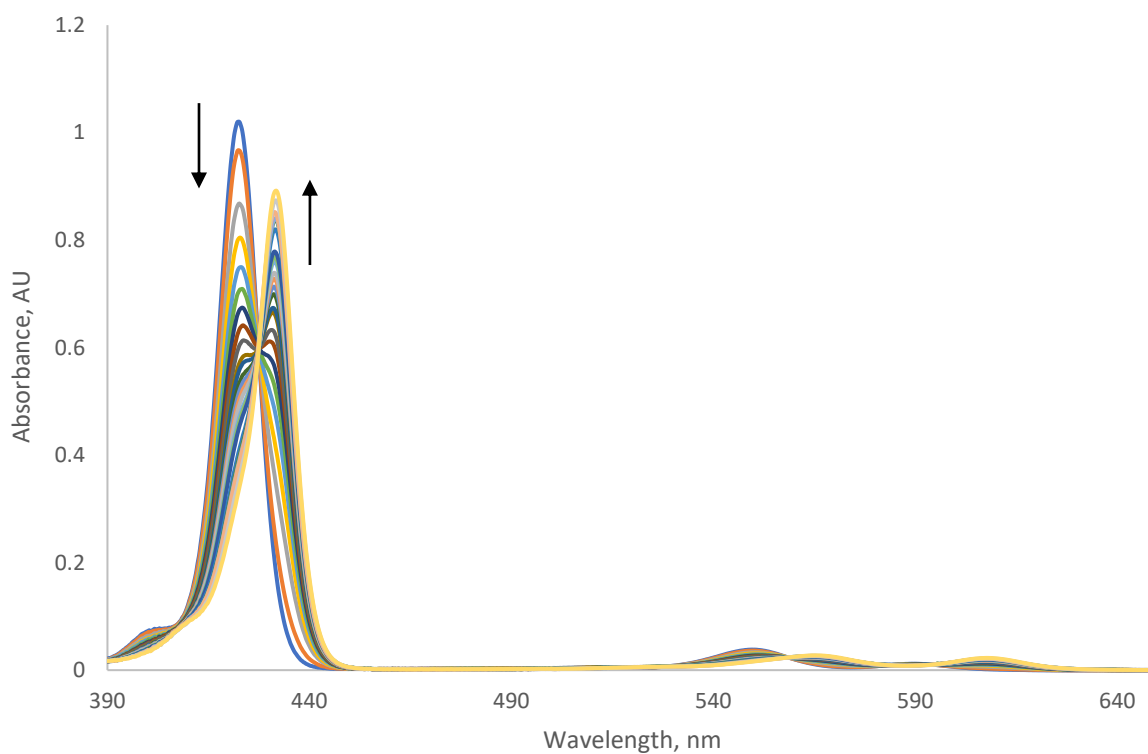

**Figure S33.** Changes in UV-Vis spectrum of **P2** ( $2.0 \times 10^{-6}$  M,  $\text{CH}_2\text{Cl}_2$ , 293 K) caused by portion-wise addition of guest **1b** ( $0$ – $8.58 \cdot 10^{-4}$  M).

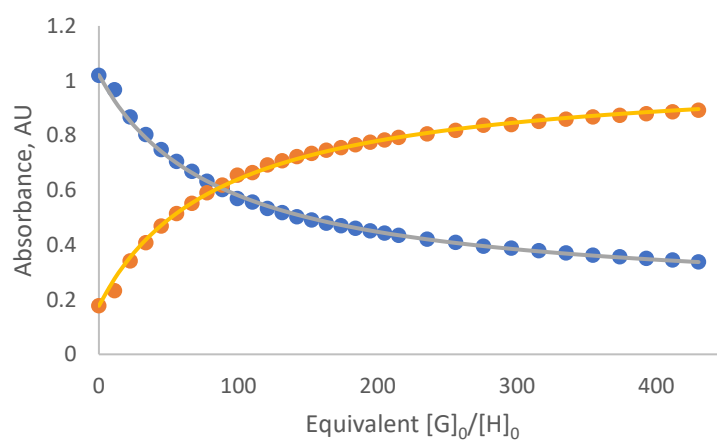

**Figure S34.** UV-Vis experimental (points) and 1:1 fitted (line) titration curves of **P2** and **1b** in  $\text{CH}_2\text{Cl}_2$ .  $[\text{G}]_0/[\text{H}]_0$  defines the ratio of **1b** guest and **P2** host. Blue points – absorbance at 422.6 nm, orange points – absorbance at 432.0 nm.

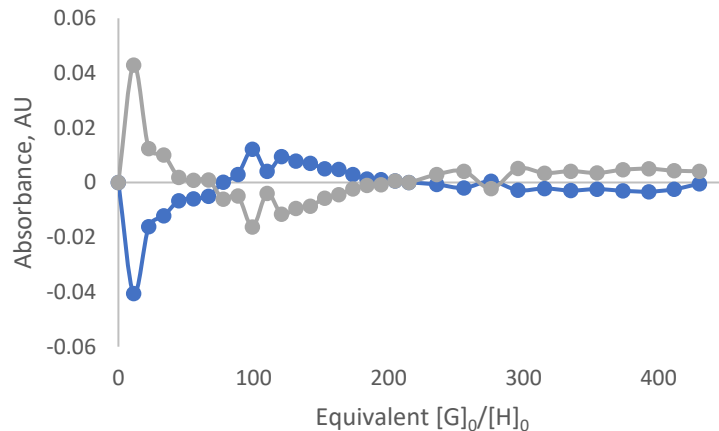

**Figure S35.** Residual analysis of UV-Vis titration between **P2** and **1b** in CH<sub>2</sub>Cl<sub>2</sub> using 1:1 model. [G]<sub>0</sub>/[H]<sub>0</sub> defines the ratio of **1b** guest and **P2** host. Blue points – absorption at 422.6 nm, grey points – absorption at 432.0 nm.

$$K_a (\mathbf{1b} + \mathbf{P2}) = (5.8 \pm 0.3) \times 10^3 \text{ M}^{-1}$$

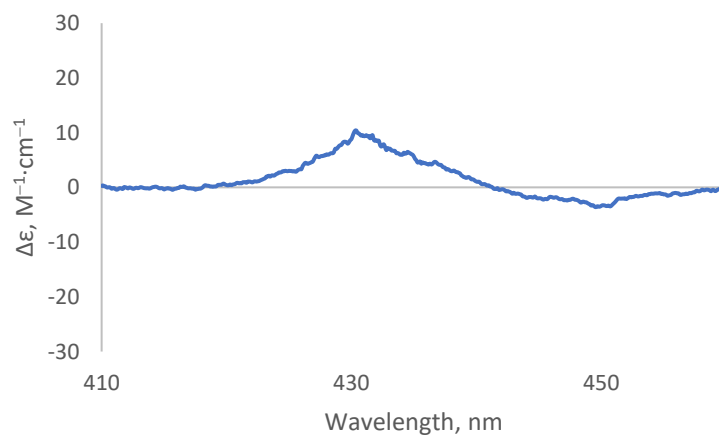

**Figure S36.** Experimental CD spectrum generated by mixing **P2** ( $2.1 \cdot 10^{-6}$  M, CH<sub>2</sub>Cl<sub>2</sub>, 293 K) and **1b** ( $3.6 \cdot 10^{-3}$  M), 97% conversion to complex.

### Spectroscopic data of system **1b** + **P5**

**Table S11.** Absorptions (AU) of **P5** ( $2.1 \times 10^{-6}$  M) derived from the UV-Vis titration of **P5** with **1b** in  $\text{CH}_2\text{Cl}_2$  and concentrations of **1b** at 293 K.

| Sample no | AU 418.0 nm | AU 428.6 nm | $C_{1b}$ , M         |
|-----------|-------------|-------------|----------------------|
| 1         | 1.281       | 0.108       | 0.00                 |
| 2         | 1.109       | 0.299       | $2.10 \cdot 10^{-5}$ |
| 3         | 0.974       | 0.444       | $4.18 \cdot 10^{-5}$ |
| 4         | 0.869       | 0.559       | $6.26 \cdot 10^{-5}$ |
| 5         | 0.788       | 0.641       | $8.33 \cdot 10^{-5}$ |
| 6         | 0.752       | 0.678       | $9.36 \cdot 10^{-5}$ |
| 7         | 0.711       | 0.726       | $1.04 \cdot 10^{-4}$ |
| 8         | 0.690       | 0.743       | $1.14 \cdot 10^{-4}$ |
| 9         | 0.655       | 0.781       | $1.24 \cdot 10^{-4}$ |
| 10        | 0.634       | 0.802       | $1.35 \cdot 10^{-4}$ |
| 11        | 0.612       | 0.824       | $1.45 \cdot 10^{-4}$ |
| 12        | 0.582       | 0.858       | $1.55 \cdot 10^{-4}$ |
| 13        | 0.572       | 0.864       | $1.65 \cdot 10^{-4}$ |
| 14        | 0.542       | 0.895       | $1.85 \cdot 10^{-4}$ |
| 15        | 0.509       | 0.934       | $2.05 \cdot 10^{-4}$ |
| 16        | 0.493       | 0.947       | $2.25 \cdot 10^{-4}$ |
| 17        | 0.465       | 0.979       | $2.45 \cdot 10^{-4}$ |
| 18        | 0.455       | 0.984       | $2.65 \cdot 10^{-4}$ |
| 19        | 0.436       | 1.008       | $2.85 \cdot 10^{-4}$ |

|    |       |       |                      |
|----|-------|-------|----------------------|
| 20 | 0.418 | 1.022 | $3.24 \cdot 10^{-4}$ |
| 21 | 0.397 | 1.042 | $3.63 \cdot 10^{-4}$ |
| 22 | 0.374 | 1.067 | $4.01 \cdot 10^{-4}$ |
| 23 | 0.346 | 1.096 | $4.39 \cdot 10^{-4}$ |
| 24 | 0.327 | 1.112 | $5.15 \cdot 10^{-4}$ |
| 25 | 0.327 | 1.112 | $5.89 \cdot 10^{-4}$ |

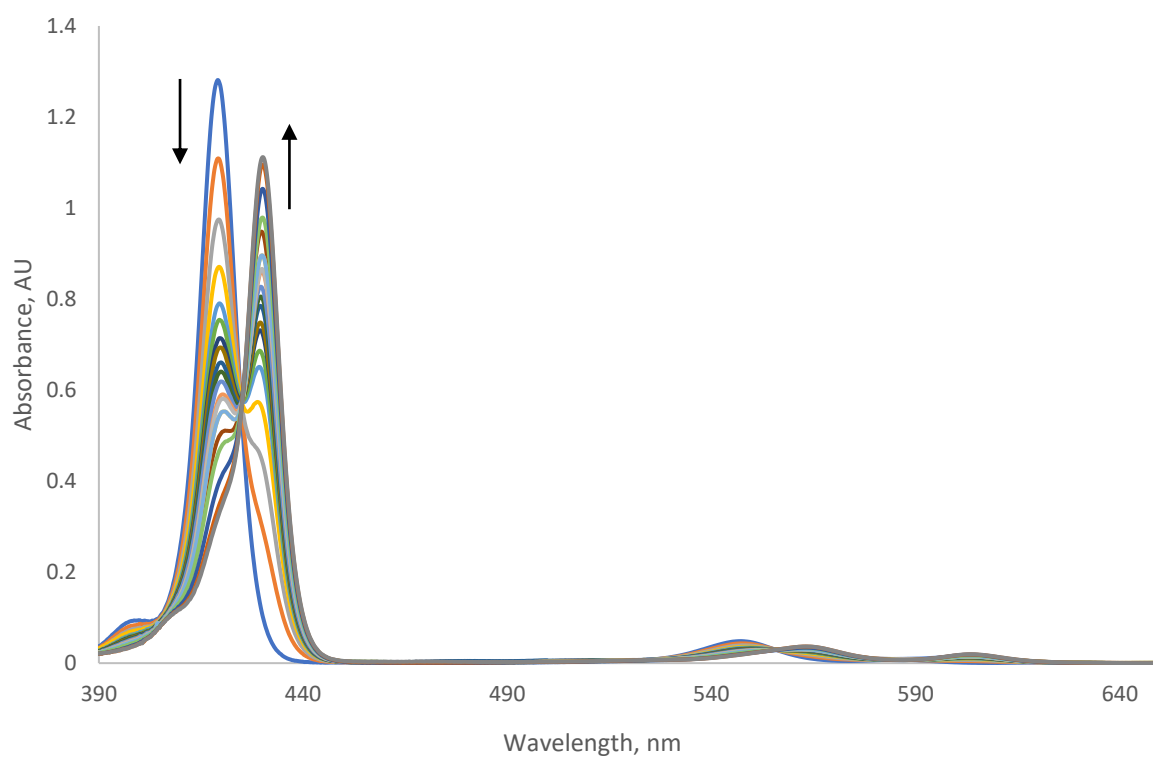

**Figure S37.** Changes in UV-Vis spectrum of **P5** ( $2.1 \times 10^{-6}$  M, CH<sub>2</sub>Cl<sub>2</sub>, 293 K) caused by portion-wise addition of guest **1b** ( $0$ – $5.89 \cdot 10^{-4}$  M).

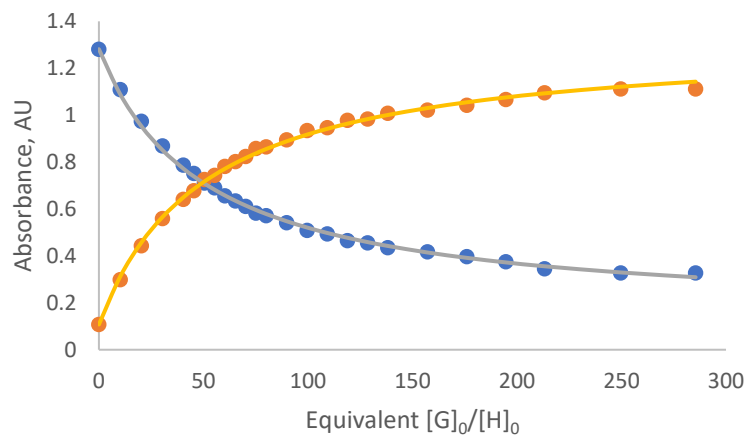

**Figure S38.** UV-Vis experimental (points) and 1:1 fitted (line) titration curves of **P5** and **1b** in  $\text{CH}_2\text{Cl}_2$ .  $[\text{G}]_0/[\text{H}]_0$  defines the ratio of **1b** guest and **P5** host. Blue points – absorption at 419.0 nm, orange points – absorption at 428.6 nm.

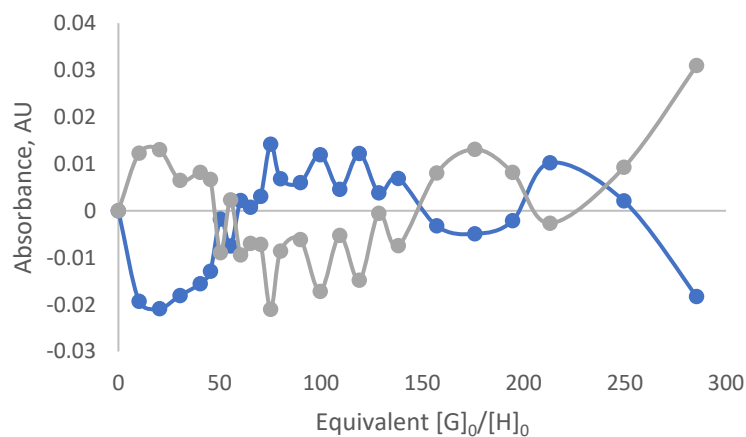

**Figure S39.** Residual analysis of UV-Vis titration between **P5** and **1b** in  $\text{CH}_2\text{Cl}_2$  using 1:1 model.  $[\text{G}]_0/[\text{H}]_0$  defines the ratio of **1b** guest and **P5** host. Blue points – absorption at 419.0 nm, grey points – absorption at 428.6 nm.

$$K_a (\mathbf{1b} + \mathbf{P5}) = (9.8 \pm 0.1) \times 10^3 \text{ M}^{-1}$$



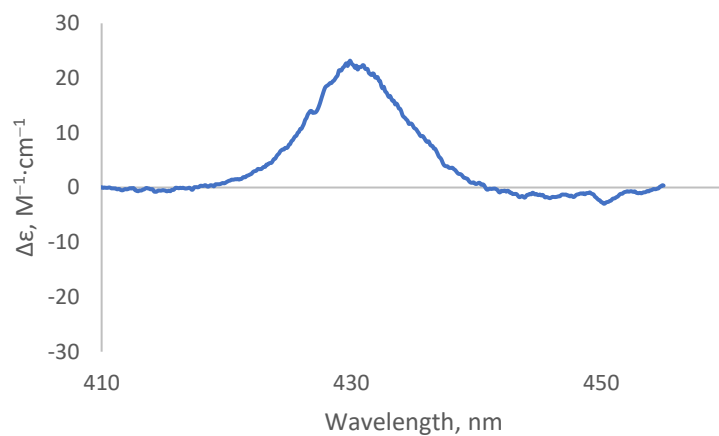

**Figure S40.** Experimental CD spectrum generated by mixing **P5** ( $2.1 \cdot 10^{-6}$  M,  $\text{CH}_2\text{Cl}_2$ , 293 K) and **1b** ( $3.7 \cdot 10^{-3}$  M), 98% conversion to complex.

#### Spectroscopic data of system **1b** + **P6**

**Table S12.** Absorptions (AU) of **P6** ( $2.0 \times 10^{-6}$  M) derived from the UV-Vis titration of **P6** with **1b** in  $\text{CH}_2\text{Cl}_2$  and concentrations of **1b** at 293 K.

| Sample no | AU 418.2 nm | AU 429.0 nm | $C_{1b}$ , M         |
|-----------|-------------|-------------|----------------------|
| 1         | 1.269       | 0.104       | 0.00                 |
| 2         | 1.088       | 0.301       | $1.40 \cdot 10^{-5}$ |
| 3         | 0.956       | 0.440       | $2.80 \cdot 10^{-5}$ |
| 4         | 0.858       | 0.545       | $4.19 \cdot 10^{-5}$ |
| 5         | 0.784       | 0.623       | $5.58 \cdot 10^{-5}$ |
| 6         | 0.733       | 0.676       | $6.68 \cdot 10^{-5}$ |
| 7         | 0.689       | 0.723       | $7.78 \cdot 10^{-5}$ |
| 8         | 0.651       | 0.762       | $8.87 \cdot 10^{-5}$ |
| 9         | 0.620       | 0.794       | $9.96 \cdot 10^{-5}$ |
| 10        | 0.590       | 0.823       | $1.10 \cdot 10^{-4}$ |

|    |       |       |                      |
|----|-------|-------|----------------------|
| 11 | 0.563 | 0.852 | $1.21 \cdot 10^{-4}$ |
| 12 | 0.539 | 0.876 | $1.32 \cdot 10^{-4}$ |
| 13 | 0.519 | 0.898 | $1.43 \cdot 10^{-4}$ |
| 14 | 0.500 | 0.916 | $1.54 \cdot 10^{-4}$ |
| 15 | 0.482 | 0.935 | $1.64 \cdot 10^{-4}$ |
| 16 | 0.467 | 0.952 | $1.75 \cdot 10^{-4}$ |
| 17 | 0.450 | 0.967 | $1.88 \cdot 10^{-4}$ |
| 18 | 0.434 | 0.984 | $2.01 \cdot 10^{-4}$ |
| 19 | 0.420 | 0.998 | $2.14 \cdot 10^{-4}$ |
| 20 | 0.406 | 1.010 | $2.27 \cdot 10^{-4}$ |
| 21 | 0.384 | 1.032 | $2.53 \cdot 10^{-4}$ |
| 22 | 0.367 | 1.048 | $2.79 \cdot 10^{-4}$ |
| 23 | 0.337 | 1.078 | $3.30 \cdot 10^{-4}$ |
| 24 | 0.299 | 1.118 | $4.28 \cdot 10^{-4}$ |
| 25 | 0.254 | 1.162 | $6.38 \cdot 10^{-4}$ |
| 26 | 0.230 | 1.187 | $8.32 \cdot 10^{-4}$ |

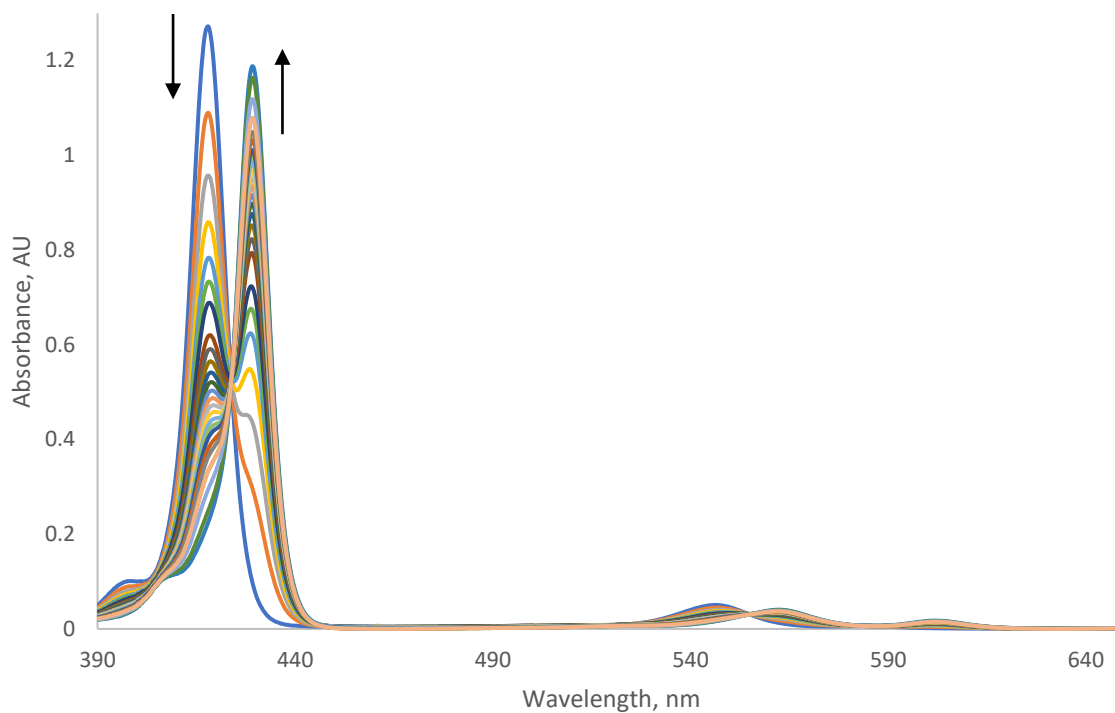

**Figure S41.** Changes in UV-Vis spectrum of **P6** ( $2.0 \times 10^{-6}$  M,  $\text{CH}_2\text{Cl}_2$ , 293 K) caused by portion-wise addition of guest **1b** ( $0$ – $8.32 \cdot 10^{-4}$  M).

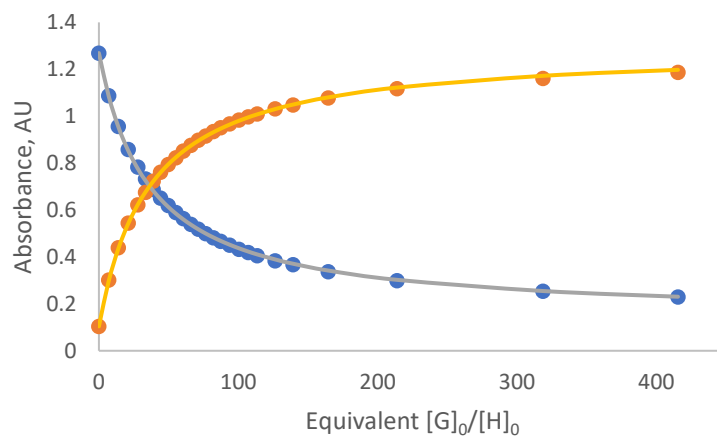

**Figure S42.** UV-Vis experimental (points) and 1:1 fitted (line) titration curves of **P6** and **1b** in  $\text{CH}_2\text{Cl}_2$ .  $[\text{G}]_0/[\text{H}]_0$  defines the ratio of **1b** guest and **P6** host. Blue points – absorbance at 418.2 nm, orange points – absorbance at 429.0 nm.

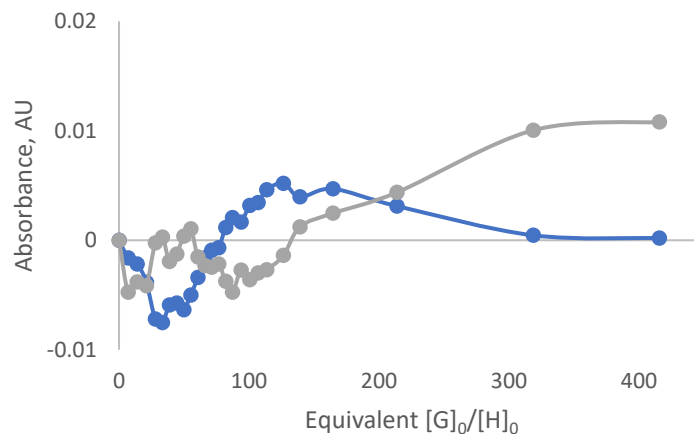

**Figure S43.** Residual analysis of UV-Vis titration between **P6** and **1b** in  $\text{CH}_2\text{Cl}_2$  using 1:1 model.  $[\text{G}]_0/[\text{H}]_0$  defines the ratio of **1b** guest and **P6** host. Blue points – absorption at 418.2 nm, grey points – absorption at 429.0 nm.

$$K_a (\mathbf{1b} + \mathbf{P6}) = (1.413 \pm 0.007) \times 10^4 \text{ M}^{-1}$$

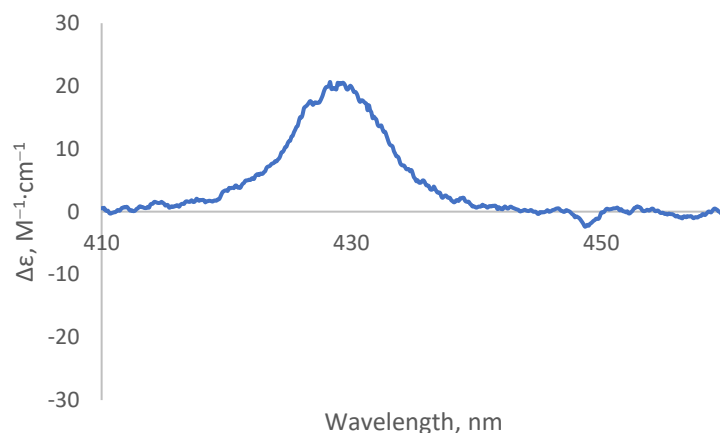

**Figure S44.** Experimental CD spectrum generated by mixing **P6** ( $1.9 \cdot 10^{-6} \text{ M}$ ,  $\text{CH}_2\text{Cl}_2$ , 293 K) and **1b** ( $1.7 \cdot 10^{-2} \text{ M}$ ), >99% conversion to complex.

### Spectroscopic data of system **1b** + **P7**

**Table S13.** Absorptions (AU) of **P7** ( $2.2 \times 10^{-6}$  M) derived from the UV-Vis titration of **P7** with **1b** in  $\text{CH}_2\text{Cl}_2$  and concentrations of **1b** at 293 K.

| Sample no | AU 420.6 nm | AU 432.0 nm | $C_{1b}$ , M         |
|-----------|-------------|-------------|----------------------|
| 1         | 0.918       | 0.114       | 0.00                 |
| 2         | 0.789       | 0.244       | $1.13 \cdot 10^{-5}$ |
| 3         | 0.686       | 0.347       | $2.25 \cdot 10^{-5}$ |
| 4         | 0.616       | 0.416       | $3.37 \cdot 10^{-5}$ |
| 5         | 0.550       | 0.482       | $4.49 \cdot 10^{-5}$ |
| 6         | 0.498       | 0.534       | $5.61 \cdot 10^{-5}$ |
| 7         | 0.468       | 0.560       | $6.73 \cdot 10^{-5}$ |
| 8         | 0.408       | 0.619       | $8.95 \cdot 10^{-5}$ |
| 9         | 0.366       | 0.662       | $1.12 \cdot 10^{-4}$ |
| 10        | 0.335       | 0.692       | $1.34 \cdot 10^{-4}$ |
| 11        | 0.307       | 0.719       | $1.55 \cdot 10^{-4}$ |
| 12        | 0.293       | 0.731       | $1.77 \cdot 10^{-4}$ |
| 13        | 0.264       | 0.759       | $2.21 \cdot 10^{-4}$ |
| 14        | 0.240       | 0.783       | $2.66 \cdot 10^{-4}$ |
| 15        | 0.227       | 0.795       | $3.06 \cdot 10^{-4}$ |
| 16        | 0.202       | 0.821       | $3.90 \cdot 10^{-4}$ |
| 17        | 0.191       | 0.830       | $4.72 \cdot 10^{-4}$ |
| 18        | 0.180       | 0.841       | $5.53 \cdot 10^{-4}$ |
| 19        | 0.173       | 0.847       | $6.32 \cdot 10^{-4}$ |

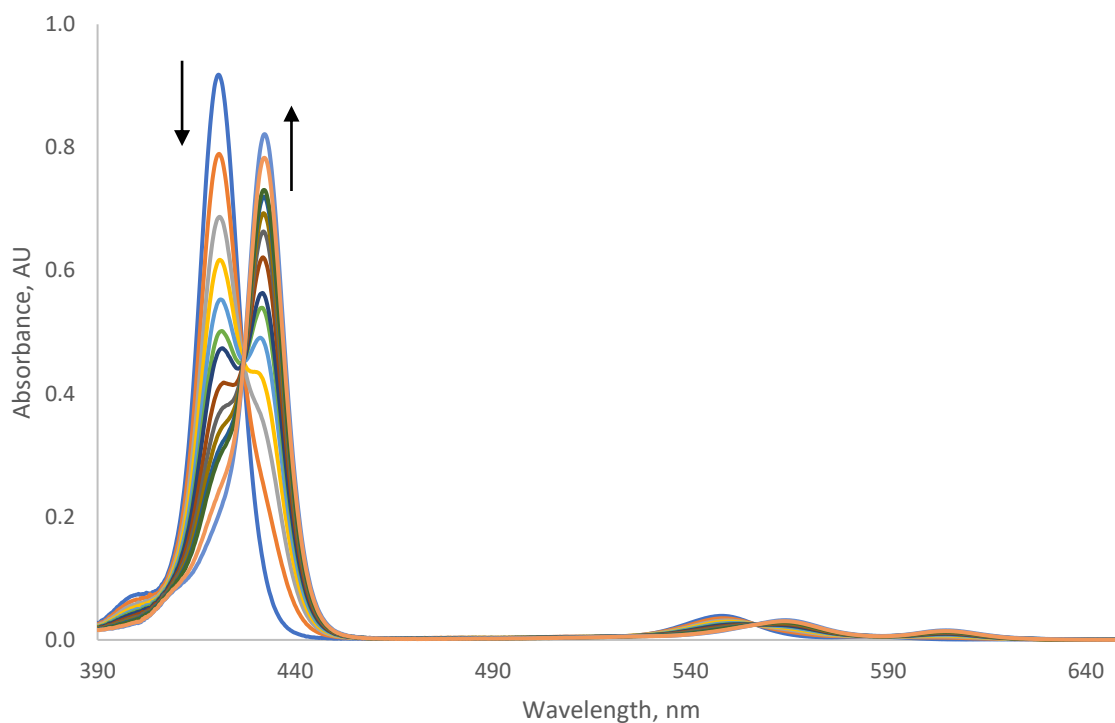

**Figure S45.** Changes in UV-Vis spectrum of **P7** ( $2.2 \times 10^{-6}$  M,  $\text{CH}_2\text{Cl}_2$ , 293 K) caused by portion-wise addition of guest **1b** ( $0\text{--}6.32 \cdot 10^{-4}$  M).

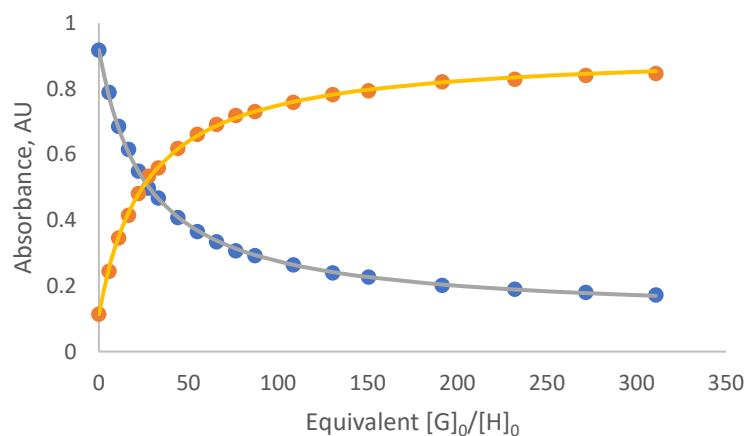

**Figure S46.** UV-Vis experimental (points) and 1:1 fitted (line) titration curves of **P7** and **1b** in  $\text{CH}_2\text{Cl}_2$ .  $[\text{G}]_0/[\text{H}]_0$  defines the ratio of **1b** guest and **P7** host. Blue points – absorption at 420.6 nm, orange points – absorption at 432.0 nm.

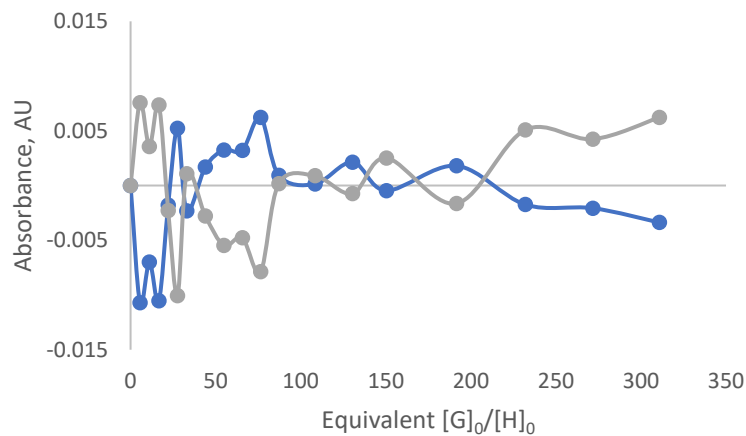

**Figure S47.** Residual analysis of UV-Vis titration between **P7** and **1b** in CH<sub>2</sub>Cl<sub>2</sub> using 1:1 model. [G]<sub>0</sub>/[H]<sub>0</sub> defines the ratio of **1b** guest and **P7** host. Blue points – absorption at 420.6 nm, grey points – absorption at 432.0 nm.

$$K_a (\mathbf{1b} + \mathbf{P7}) = (1.91 \pm 0.02) \times 10^4 \text{ M}^{-1}$$

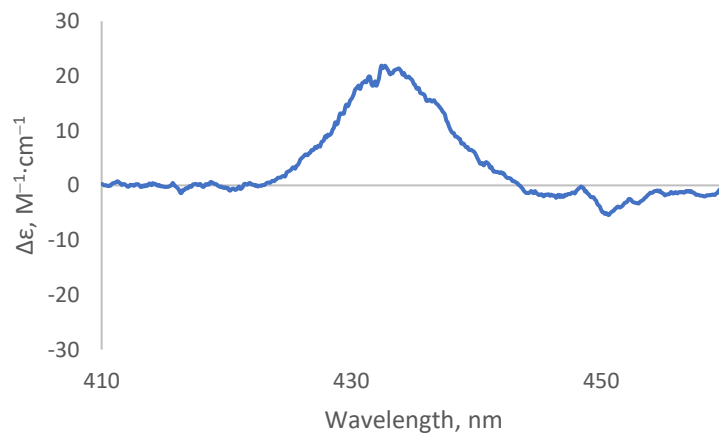

**Figure S48.** Experimental CD spectrum generated by mixing **P7** ( $2.1 \cdot 10^{-6}$  M, CH<sub>2</sub>Cl<sub>2</sub>, 293 K) and **1b** ( $4.1 \cdot 10^{-3}$  M), 99% conversion to complex.

### Spectroscopic data of system **1c** + **P1**

**Table S14.** Absorptions (AU) of **P1** ( $2.1 \times 10^{-6}$  M) derived from the UV-Vis titration of **P1** with **1c** in  $\text{CH}_2\text{Cl}_2$  and concentrations of **1c** at 293 K.

| Sample no | AU 423.0 nm | AU 433.0 nm | $C_{1c}$ , M         |
|-----------|-------------|-------------|----------------------|
| 1         | 1.103       | 0.182       | 0.00                 |
| 2         | 1.059       | 0.231       | $7.45 \cdot 10^{-6}$ |
| 3         | 1.013       | 0.285       | $1.49 \cdot 10^{-5}$ |
| 4         | 0.969       | 0.333       | $2.23 \cdot 10^{-5}$ |
| 5         | 0.930       | 0.376       | $2.97 \cdot 10^{-5}$ |
| 6         | 0.865       | 0.447       | $4.44 \cdot 10^{-5}$ |
| 7         | 0.810       | 0.510       | $5.91 \cdot 10^{-5}$ |
| 8         | 0.762       | 0.563       | $7.37 \cdot 10^{-5}$ |
| 9         | 0.722       | 0.608       | $8.82 \cdot 10^{-5}$ |
| 10        | 0.686       | 0.646       | $1.03 \cdot 10^{-4}$ |
| 11        | 0.656       | 0.681       | $1.17 \cdot 10^{-4}$ |
| 12        | 0.628       | 0.711       | $1.31 \cdot 10^{-4}$ |
| 13        | 0.604       | 0.739       | $1.46 \cdot 10^{-4}$ |
| 14        | 0.582       | 0.763       | $1.60 \cdot 10^{-4}$ |
| 15        | 0.563       | 0.784       | $1.74 \cdot 10^{-4}$ |
| 16        | 0.531       | 0.818       | $2.02 \cdot 10^{-4}$ |
| 17        | 0.504       | 0.848       | $2.30 \cdot 10^{-4}$ |
| 18        | 0.471       | 0.885       | $2.71 \cdot 10^{-4}$ |
| 19        | 0.437       | 0.921       | $3.25 \cdot 10^{-4}$ |



|    |       |       |                      |
|----|-------|-------|----------------------|
| 20 | 0.410 | 0.952 | $3.78 \cdot 10^{-4}$ |
| 21 | 0.373 | 0.991 | $4.82 \cdot 10^{-4}$ |
| 22 | 0.337 | 1.028 | $6.30 \cdot 10^{-4}$ |
| 23 | 0.302 | 1.065 | $8.40 \cdot 10^{-4}$ |
| 24 | 0.281 | 1.089 | $1.03 \cdot 10^{-3}$ |
| 25 | 0.267 | 1.101 | $1.21 \cdot 10^{-3}$ |
| 26 | 0.257 | 1.112 | $1.38 \cdot 10^{-3}$ |

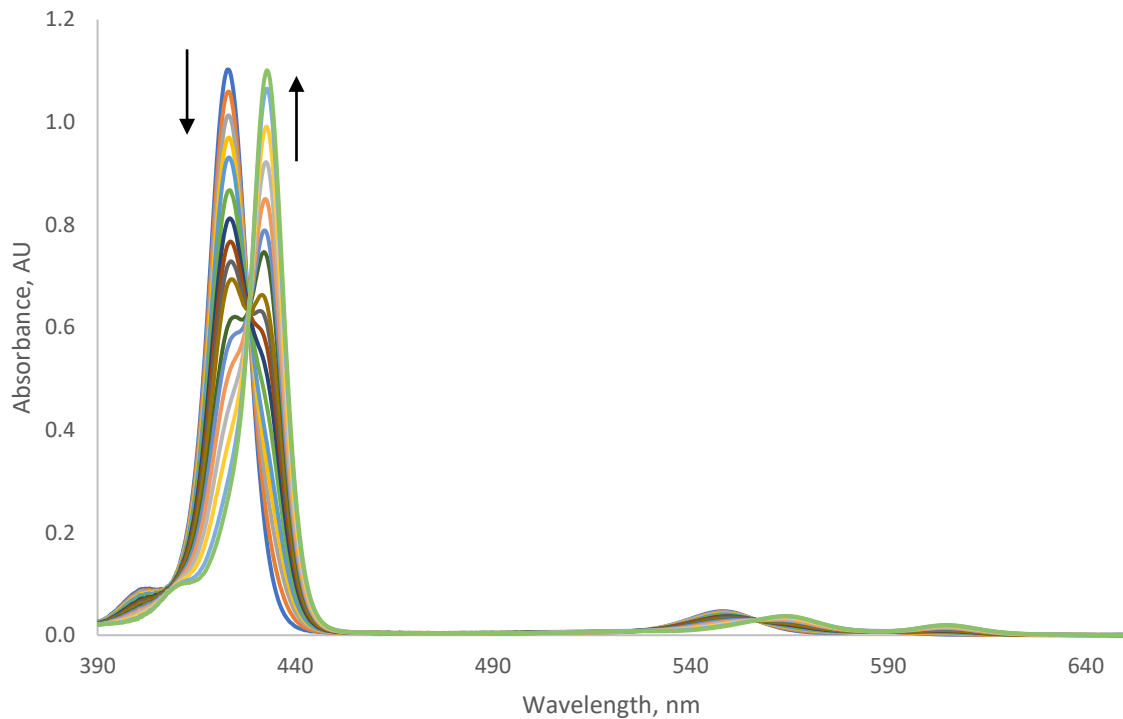

**Figure S49.** Changes in UV-Vis spectrum of **P1** ( $2.1 \times 10^{-6}$  M,  $\text{CH}_2\text{Cl}_2$ , 293 K) caused by portion-wise addition of guest **1c** ( $0$ – $1.38 \cdot 10^{-3}$  M).

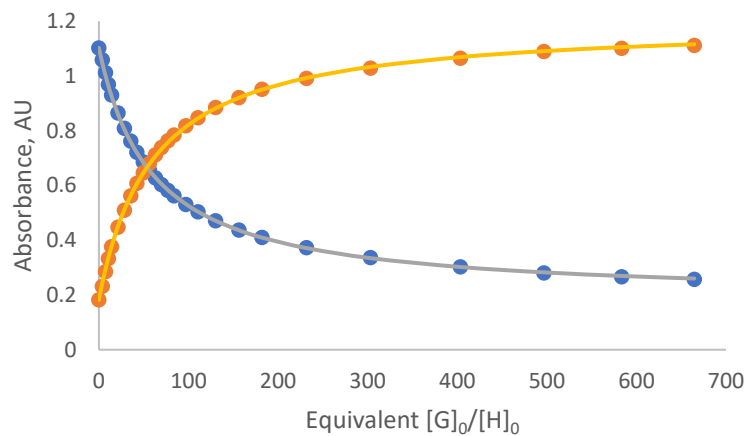

**Figure S50.** UV-Vis experimental (points) and 1:1 fitted (line) titration curves of **P1** and **1c** in CH<sub>2</sub>Cl<sub>2</sub>. [G]<sub>0</sub>/[H]<sub>0</sub> defines the ratio of **1c** guest and **P1** host. Blue points – absorption at 423.0 nm, orange points – absorption at 433.0 nm.

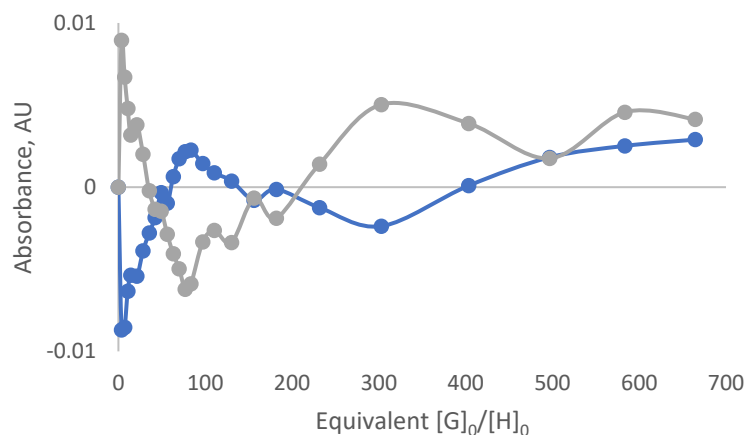

**Figure S51.** Residual analysis of UV-Vis titration between **P1** and **1c** in CH<sub>2</sub>Cl<sub>2</sub> using 1:1 model. [G]<sub>0</sub>/[H]<sub>0</sub> defines the ratio of **1c** guest and **P1** host. Blue points – absorption at 423.0 nm, grey points – absorption at 433.0 nm.

$$K_a (\mathbf{1c} + \mathbf{P1}) = (8.2 \pm 0.5) \times 10^3 \text{ M}^{-1}$$

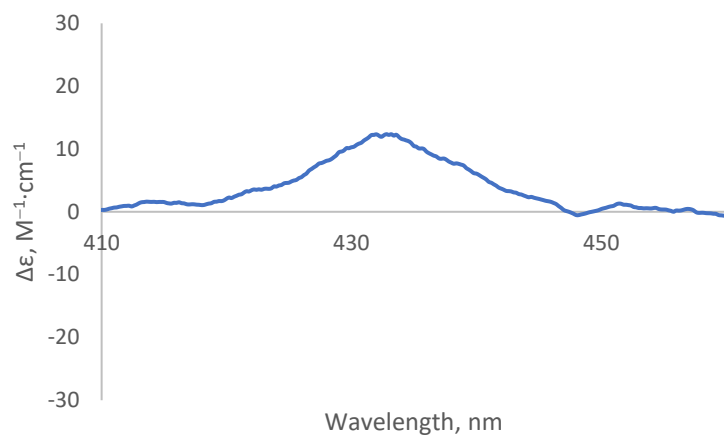

**Figure S52.** Experimental CD spectrum generated by mixing **P1** ( $2.1 \cdot 10^{-6}$  M,  $\text{CH}_2\text{Cl}_2$ , 293 K) and **1c** ( $1.4 \cdot 10^{-4}$  M), 92% conversion to complex.

#### Spectroscopic data of system **1c** + **P2**

**Table S15.** Absorptions (AU) of **P2** ( $2.0 \times 10^{-6}$  M) derived from the UV-Vis titration of **P2** with **1c** in  $\text{CH}_2\text{Cl}_2$  and concentrations of **1c** at 293 K.

| Sample no | AU 422.4 nm | AU 431.8 nm | $C_{1c}$ , M         |
|-----------|-------------|-------------|----------------------|
| 1         | 1.137       | 0.201       | 0.00                 |
| 2         | 0.994       | 0.356       | $2.30 \cdot 10^{-5}$ |
| 3         | 0.886       | 0.475       | $4.58 \cdot 10^{-5}$ |
| 4         | 0.803       | 0.564       | $6.86 \cdot 10^{-5}$ |
| 5         | 0.726       | 0.644       | $9.58 \cdot 10^{-5}$ |
| 6         | 0.688       | 0.686       | $1.14 \cdot 10^{-4}$ |
| 7         | 0.654       | 0.722       | $1.32 \cdot 10^{-4}$ |
| 8         | 0.622       | 0.755       | $1.50 \cdot 10^{-4}$ |
| 9         | 0.595       | 0.781       | $1.67 \cdot 10^{-4}$ |
| 10        | 0.571       | 0.807       | $1.85 \cdot 10^{-4}$ |

|    |       |       |                      |
|----|-------|-------|----------------------|
| 11 | 0.552 | 0.828 | $2.03 \cdot 10^{-4}$ |
| 12 | 0.534 | 0.847 | $2.21 \cdot 10^{-4}$ |
| 13 | 0.517 | 0.865 | $2.38 \cdot 10^{-4}$ |
| 14 | 0.502 | 0.879 | $2.56 \cdot 10^{-4}$ |
| 15 | 0.488 | 0.893 | $2.73 \cdot 10^{-4}$ |
| 16 | 0.475 | 0.908 | $2.90 \cdot 10^{-4}$ |
| 17 | 0.464 | 0.919 | $3.08 \cdot 10^{-4}$ |
| 18 | 0.441 | 0.940 | $3.51 \cdot 10^{-4}$ |
| 19 | 0.420 | 0.963 | $3.93 \cdot 10^{-4}$ |
| 20 | 0.404 | 0.979 | $4.35 \cdot 10^{-4}$ |
| 21 | 0.379 | 1.005 | $5.19 \cdot 10^{-4}$ |
| 22 | 0.357 | 1.029 | $6.01 \cdot 10^{-4}$ |
| 23 | 0.328 | 1.059 | $7.79 \cdot 10^{-4}$ |

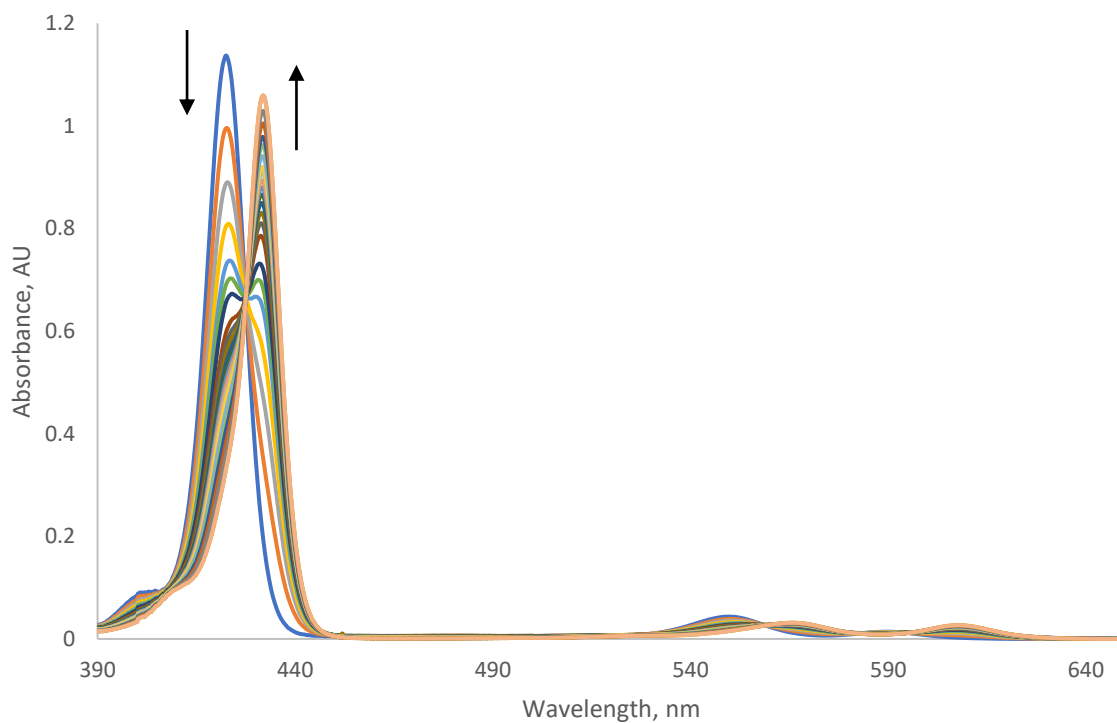

**Figure S53.** Changes in UV-Vis spectrum of **P2** ( $2.0 \times 10^{-6}$  M,  $\text{CH}_2\text{Cl}_2$ , 293 K) caused by portion-wise addition of guest **1c** ( $0-7.79 \cdot 10^{-4}$  M).

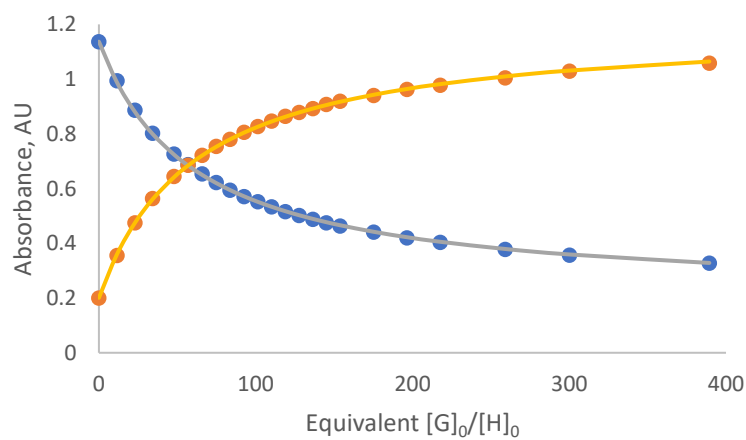

**Figure S54.** UV-Vis experimental (points) and 1:1 fitted (line) titration curves of **P2** and **1c** in  $\text{CH}_2\text{Cl}_2$ .  $[\text{G}]_0/[\text{H}]_0$  defines the ratio of **1c** guest and **P2** host. Blue points – absorbance at 422.4 nm, orange points – absorbance at 431.8 nm.

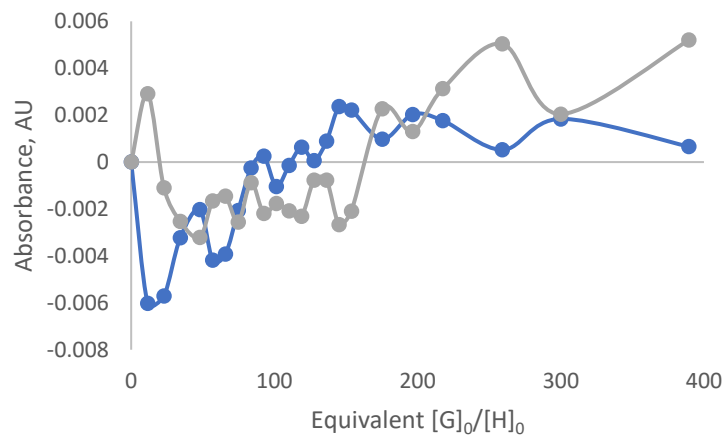

**Figure S55.** Residual analysis of UV-Vis titration between **P2** and **1c** in CH<sub>2</sub>Cl<sub>2</sub> using 1:1 model. [G]<sub>0</sub>/[H]<sub>0</sub> defines the ratio of **1c** guest and **P2** host. Blue points – absorption at 422.4 nm, grey points – absorption at 431.8 nm.

$$K_a(\mathbf{1c} + \mathbf{P2}) = (8.35 \pm 0.03) \times 10^3 \text{ M}^{-1}$$

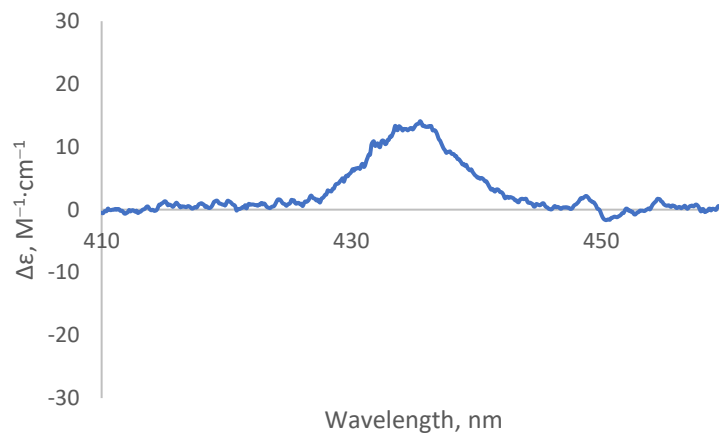

**Figure S56.** Experimental CD spectrum generated by mixing **P2** ( $2.0 \cdot 10^{-6}$  M, CH<sub>2</sub>Cl<sub>2</sub>, 293 K) and **1c** ( $7.8 \cdot 10^{-4}$  M), 87% conversion to complex.

### Spectroscopic data of system **1c** + **P4**

**Table S16.** Absorptions (AU) of **P4** ( $2.0 \times 10^{-6}$  M) derived from the UV-Vis titration of **P4** with **1c** in  $\text{CH}_2\text{Cl}_2$  and concentrations of **1c** at 293 K.

| Sample no | AU 417.8 nm | AU 428.8 nm | $C_{1c}$ , M         |
|-----------|-------------|-------------|----------------------|
| 1         | 1.182       | 0.085       | 0.00                 |
| 2         | 1.047       | 0.238       | $1.45 \cdot 10^{-5}$ |
| 3         | 0.937       | 0.359       | $2.90 \cdot 10^{-5}$ |
| 4         | 0.870       | 0.428       | $4.05 \cdot 10^{-5}$ |
| 5         | 0.818       | 0.485       | $5.19 \cdot 10^{-5}$ |
| 6         | 0.763       | 0.544       | $6.62 \cdot 10^{-5}$ |
| 7         | 0.716       | 0.595       | $8.04 \cdot 10^{-5}$ |
| 8         | 0.676       | 0.639       | $9.45 \cdot 10^{-5}$ |
| 9         | 0.642       | 0.676       | $1.09 \cdot 10^{-4}$ |
| 10        | 0.612       | 0.706       | $1.23 \cdot 10^{-4}$ |
| 11        | 0.587       | 0.733       | $1.37 \cdot 10^{-4}$ |
| 12        | 0.565       | 0.760       | $1.50 \cdot 10^{-4}$ |
| 13        | 0.544       | 0.778       | $1.64 \cdot 10^{-4}$ |
| 14        | 0.526       | 0.799       | $1.78 \cdot 10^{-4}$ |
| 15        | 0.509       | 0.814       | $1.92 \cdot 10^{-4}$ |
| 16        | 0.495       | 0.828       | $2.05 \cdot 10^{-4}$ |
| 17        | 0.483       | 0.839       | $2.19 \cdot 10^{-4}$ |
| 18        | 0.472       | 0.851       | $2.32 \cdot 10^{-4}$ |
| 19        | 0.462       | 0.862       | $2.46 \cdot 10^{-4}$ |

|    |       |       |                      |
|----|-------|-------|----------------------|
| 20 | 0.444 | 0.880 | $2.72 \cdot 10^{-4}$ |
| 21 | 0.427 | 0.899 | $2.99 \cdot 10^{-4}$ |
| 22 | 0.414 | 0.912 | $3.25 \cdot 10^{-4}$ |
| 23 | 0.393 | 0.932 | $3.77 \cdot 10^{-4}$ |
| 24 | 0.376 | 0.952 | $4.28 \cdot 10^{-4}$ |
| 25 | 0.357 | 0.973 | $5.02 \cdot 10^{-4}$ |
| 26 | 0.336 | 0.997 | $6.10 \cdot 10^{-4}$ |
| 27 | 0.321 | 1.012 | $7.14 \cdot 10^{-4}$ |
| 28 | 0.299 | 1.034 | $9.32 \cdot 10^{-4}$ |

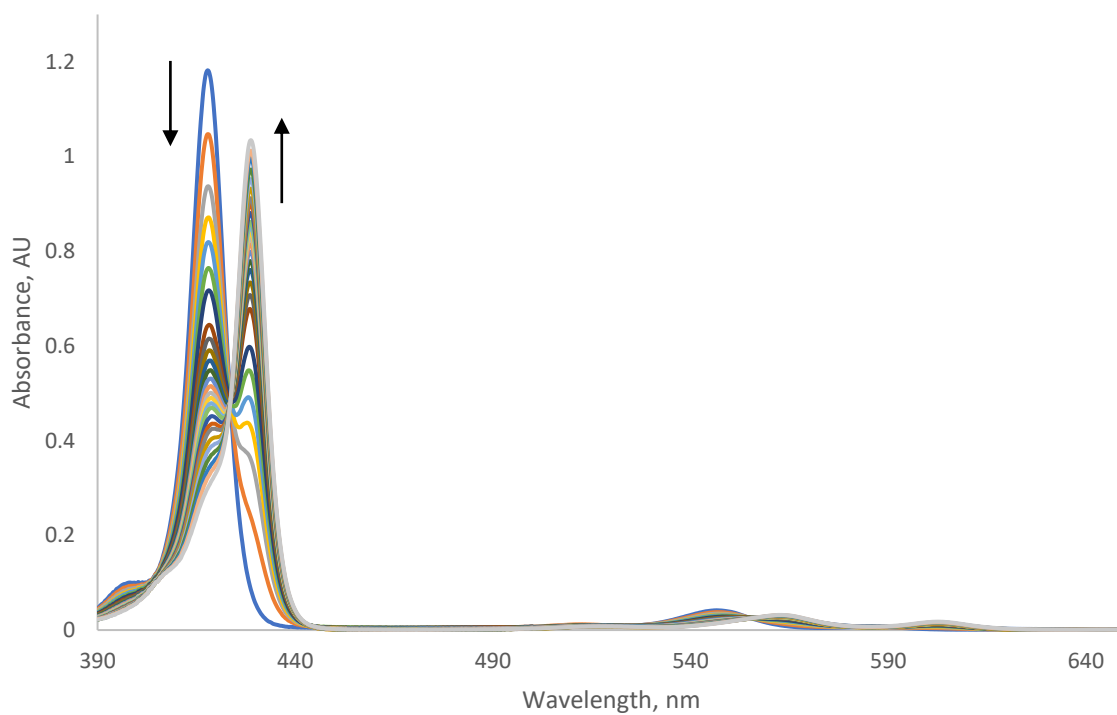

**Figure S57.** Changes in UV-Vis spectrum of **P4** ( $2.0 \times 10^{-6}$  M,  $\text{CH}_2\text{Cl}_2$ , 293 K) caused by portion-wise addition of guest **1c** ( $0$ – $9.32 \cdot 10^{-4}$  M).



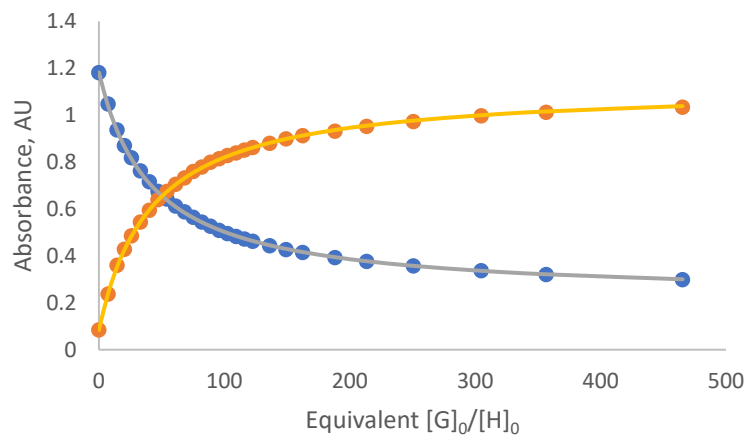

**Figure S58.** UV-Vis experimental (points) and 1:1 fitted (line) titration curves of **P4** and **1c** in CH<sub>2</sub>Cl<sub>2</sub>. [G]<sub>0</sub>/[H]<sub>0</sub> defines the ratio of **1c** guest and **P4** host. Blue points – absorption at 417.8 nm, orange points – absorption at 428.8 nm.

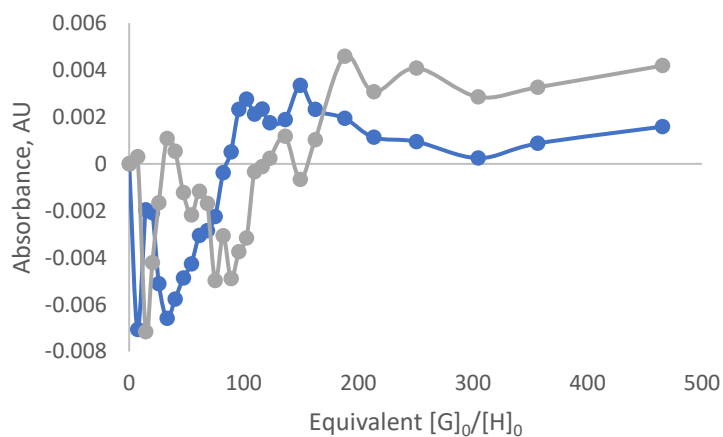

**Figure S59.** Residual analysis of UV-Vis titration between **P4** and **1c** in CH<sub>2</sub>Cl<sub>2</sub> using 1:1 model. [G]<sub>0</sub>/[H]<sub>0</sub> defines the ratio of **1c** guest and **P4** host. Blue points – absorption at 417.8 nm, grey points – absorption at 428.8 nm.

$$K_a (\mathbf{1c} + \mathbf{P4}) = (1.221 \pm 0.005) \times 10^4 \text{ M}^{-1}$$

### Spectroscopic data of system **1c** + **P5**

**Table S17.** Absorptions (AU) of **P5** ( $2.0 \times 10^{-6}$  M) derived from the UV-Vis titration of **P5** with **1c** in  $\text{CH}_2\text{Cl}_2$  and concentrations of **1c** at 293 K.

| Sample no | AU 419.4nm | AU 430.4 nm | $C_{1c}$ , M         |
|-----------|------------|-------------|----------------------|
| 1         | 1.268      | 0.110       | 0.00                 |
| 2         | 1.086      | 0.311       | $1.37 \cdot 10^{-5}$ |
| 3         | 0.981      | 0.423       | $2.73 \cdot 10^{-5}$ |
| 4         | 0.882      | 0.531       | $4.09 \cdot 10^{-5}$ |
| 5         | 0.811      | 0.606       | $5.44 \cdot 10^{-5}$ |
| 6         | 0.751      | 0.670       | $6.78 \cdot 10^{-5}$ |
| 7         | 0.696      | 0.728       | $8.12 \cdot 10^{-5}$ |
| 8         | 0.665      | 0.761       | $9.19 \cdot 10^{-5}$ |
| 9         | 0.639      | 0.787       | $1.03 \cdot 10^{-4}$ |
| 10        | 0.611      | 0.817       | $1.13 \cdot 10^{-4}$ |
| 11        | 0.587      | 0.843       | $1.24 \cdot 10^{-4}$ |
| 12        | 0.564      | 0.870       | $1.34 \cdot 10^{-4}$ |
| 13        | 0.544      | 0.887       | $1.45 \cdot 10^{-4}$ |
| 14        | 0.524      | 0.910       | $1.55 \cdot 10^{-4}$ |
| 15        | 0.507      | 0.928       | $1.65 \cdot 10^{-4}$ |
| 16        | 0.491      | 0.944       | $1.76 \cdot 10^{-4}$ |
| 17        | 0.476      | 0.959       | $1.86 \cdot 10^{-4}$ |
| 18        | 0.461      | 0.975       | $1.96 \cdot 10^{-4}$ |
| 19        | 0.449      | 0.986       | $2.07 \cdot 10^{-4}$ |

|    |       |       |                      |
|----|-------|-------|----------------------|
| 20 | 0.437 | 1.002 | $2.17 \cdot 10^{-4}$ |
| 21 | 0.413 | 1.024 | $2.42 \cdot 10^{-4}$ |
| 22 | 0.390 | 1.049 | $2.67 \cdot 10^{-4}$ |
| 23 | 0.368 | 1.071 | $2.92 \cdot 10^{-4}$ |
| 24 | 0.352 | 1.089 | $3.17 \cdot 10^{-4}$ |
| 25 | 0.338 | 1.102 | $3.41 \cdot 10^{-4}$ |
| 26 | 0.326 | 1.116 | $3.65 \cdot 10^{-4}$ |
| 27 | 0.306 | 1.137 | $4.13 \cdot 10^{-4}$ |
| 28 | 0.275 | 1.174 | $5.17 \cdot 10^{-4}$ |
| 29 | 0.255 | 1.197 | $6.18 \cdot 10^{-4}$ |

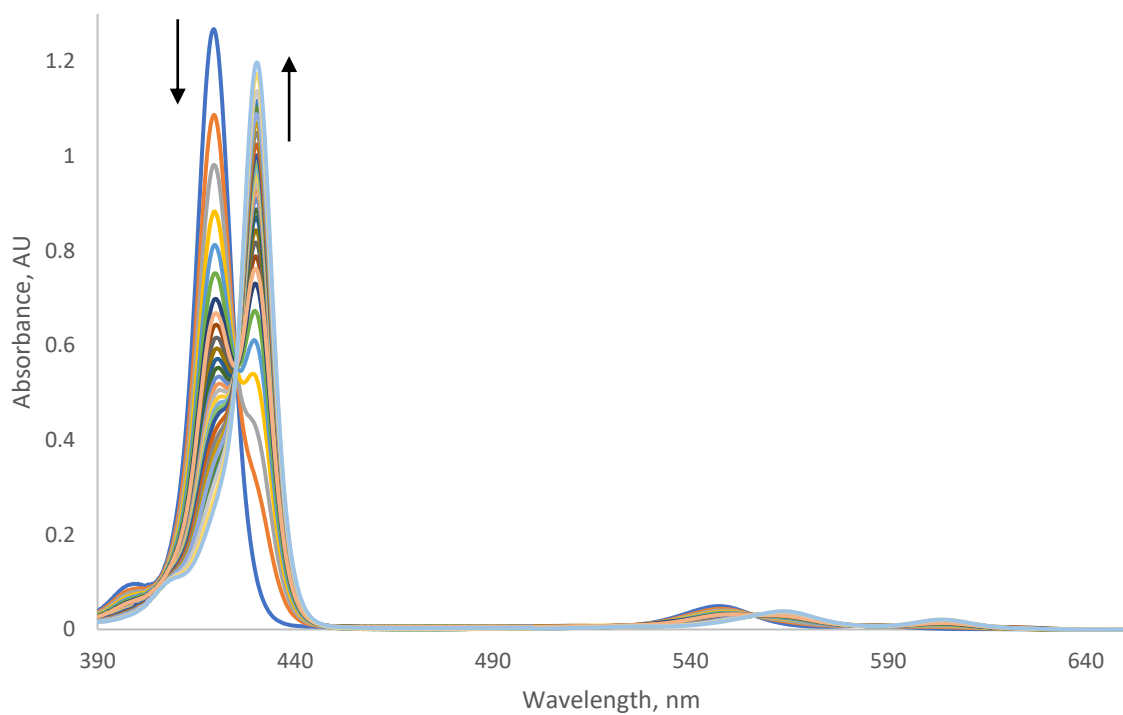

**Figure S60.** Changes in UV-Vis spectrum of **P5** ( $2.0 \times 10^{-6}$  M,  $\text{CH}_2\text{Cl}_2$ , 293 K) caused by portion-wise addition of guest **1c** ( $0$ – $6.18 \cdot 10^{-4}$  M).

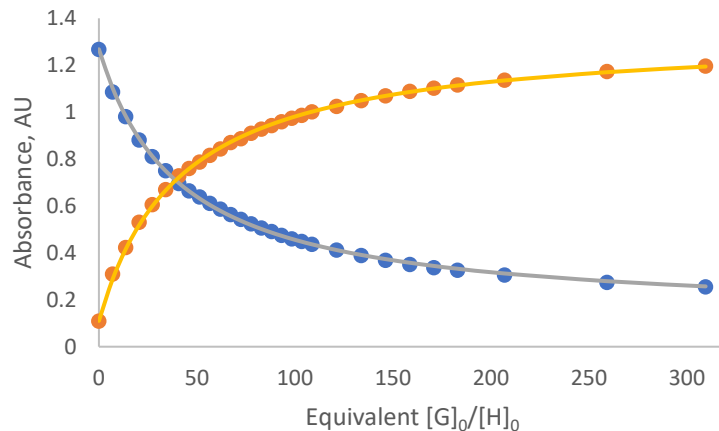

**Figure S61.** UV-Vis experimental (points) and 1:1 fitted (line) titration curves of **P5** and **1c** in CH<sub>2</sub>Cl<sub>2</sub>.  $[G]_0/[H]_0$  defines the ratio of **1c** guest and **P5** host. Blue points – absorption at 419.4 nm, orange points – absorption at 430.4 nm.

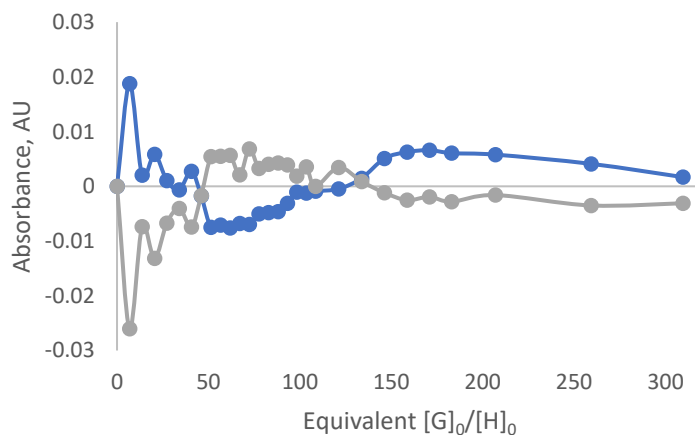

**Figure S62.** Residual analysis of UV-Vis titration between **P5** and **1c** in CH<sub>2</sub>Cl<sub>2</sub> using 1:1 model.  $[G]_0/[H]_0$  defines the ratio of **1c** guest and **P5** host. Blue points – absorption at 419.4 nm, grey points – absorption at 430.4 nm.

$$K_a (\mathbf{1c} + \mathbf{P5}) = (1.24 \pm 0.01) \times 10^4 \text{ M}^{-1}$$

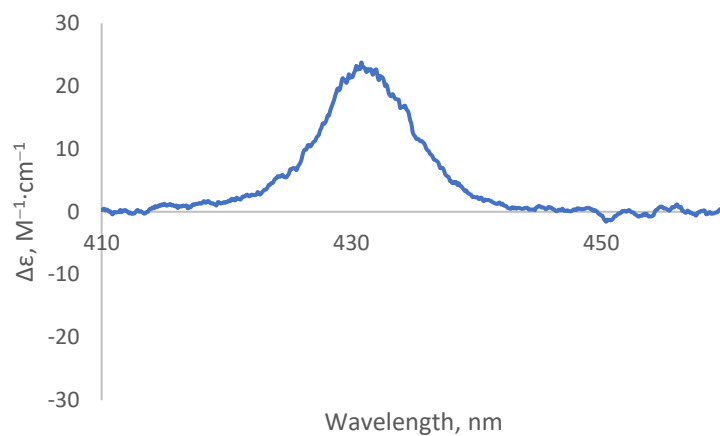

**Figure S63.** Experimental CD spectrum generated by mixing **P5** ( $2.1 \cdot 10^{-6}$  M,  $\text{CH}_2\text{Cl}_2$ , 293 K) and **1c** ( $6.2 \cdot 10^{-4}$  M), 88% conversion to complex.

#### Spectroscopic data of system **1c** + **P6**

**Table S18.** Absorptions (AU) of **P6** ( $2.0 \times 10^{-6}$  M) derived from the UV-Vis titration of **P6** with **1c** in  $\text{CH}_2\text{Cl}_2$  and concentrations of **1c** at 293 K.

| Sample no | Abs 417.8 nm | Abs 429.4 nm | $C_{1c}$ , M         |
|-----------|--------------|--------------|----------------------|
| 1         | 1.228        | 0.086        | 0.00                 |
| 2         | 1.094        | 0.233        | $7.20 \cdot 10^{-6}$ |
| 3         | 0.969        | 0.365        | $1.44 \cdot 10^{-5}$ |
| 4         | 0.883        | 0.458        | $2.15 \cdot 10^{-5}$ |
| 5         | 0.817        | 0.528        | $2.86 \cdot 10^{-5}$ |
| 6         | 0.756        | 0.591        | $3.56 \cdot 10^{-5}$ |
| 7         | 0.705        | 0.646        | $4.27 \cdot 10^{-5}$ |
| 8         | 0.663        | 0.689        | $4.97 \cdot 10^{-5}$ |
| 9         | 0.626        | 0.725        | $5.66 \cdot 10^{-5}$ |
| 10        | 0.593        | 0.760        | $6.36 \cdot 10^{-5}$ |

|    |       |       |                      |
|----|-------|-------|----------------------|
| 11 | 0.559 | 0.791 | $7.04 \cdot 10^{-5}$ |
| 12 | 0.539 | 0.815 | $7.73 \cdot 10^{-5}$ |
| 13 | 0.513 | 0.842 | $8.41 \cdot 10^{-5}$ |
| 14 | 0.491 | 0.866 | $9.09 \cdot 10^{-5}$ |
| 15 | 0.472 | 0.883 | $9.77 \cdot 10^{-5}$ |
| 16 | 0.455 | 0.900 | $1.04 \cdot 10^{-4}$ |
| 17 | 0.439 | 0.916 | $1.11 \cdot 10^{-4}$ |
| 18 | 0.414 | 0.940 | $1.24 \cdot 10^{-4}$ |
| 19 | 0.390 | 0.965 | $1.38 \cdot 10^{-4}$ |
| 20 | 0.371 | 0.982 | $1.51 \cdot 10^{-4}$ |
| 21 | 0.354 | 0.999 | $1.64 \cdot 10^{-4}$ |
| 22 | 0.329 | 1.029 | $1.89 \cdot 10^{-4}$ |
| 23 | 0.308 | 1.047 | $2.14 \cdot 10^{-4}$ |
| 24 | 0.285 | 1.071 | $2.51 \cdot 10^{-4}$ |
| 25 | 0.260 | 1.098 | $3.05 \cdot 10^{-4}$ |
| 26 | 0.230 | 1.126 | $4.06 \cdot 10^{-4}$ |

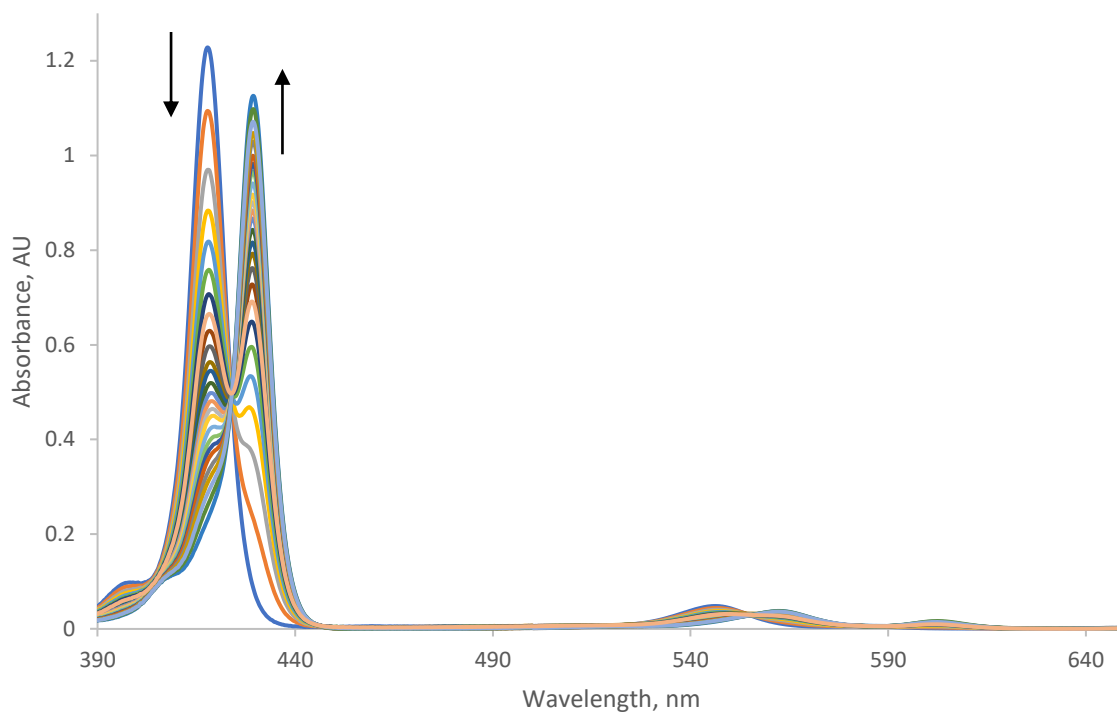

**Figure S64.** Changes in UV-Vis spectrum of **P6** ( $2.0 \times 10^{-6}$  M,  $\text{CH}_2\text{Cl}_2$ , 293 K) caused by portion-wise addition of guest **1c** ( $0$ – $4.06 \cdot 10^{-4}$  M).

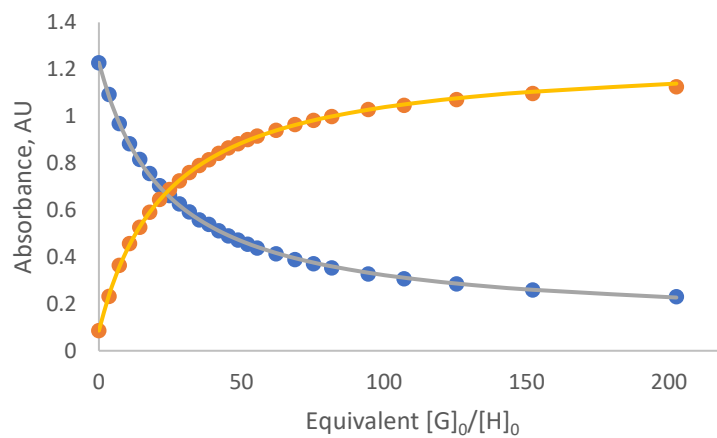

**Figure S65.** UV-Vis experimental (points) and 1:1 fitted (line) titration curves of **P6** and **1c** in  $\text{CH}_2\text{Cl}_2$ .  $[\text{G}]_0/[\text{H}]_0$  defines the ratio of **1c** guest and **P6** host. Blue points – absorbance at 417.8 nm, orange points – absorbance at 429.4 nm.

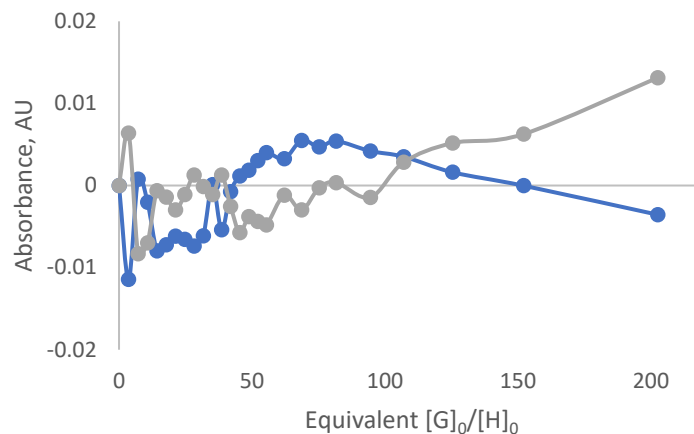

**Figure S66.** Residual analysis of UV-Vis titration between **P6** and **1c** in CH<sub>2</sub>Cl<sub>2</sub> using 1:1 model. [G]<sub>0</sub>/[H]<sub>0</sub> defines the ratio of **1c** guest and **P6** host. Blue points – absorption at 417.8 nm, grey points – absorption at 429.4 nm.

$$K_a(\mathbf{1c} + \mathbf{P6}) = (2.16 \pm 0.01) \times 10^4 \text{ M}^{-1}$$

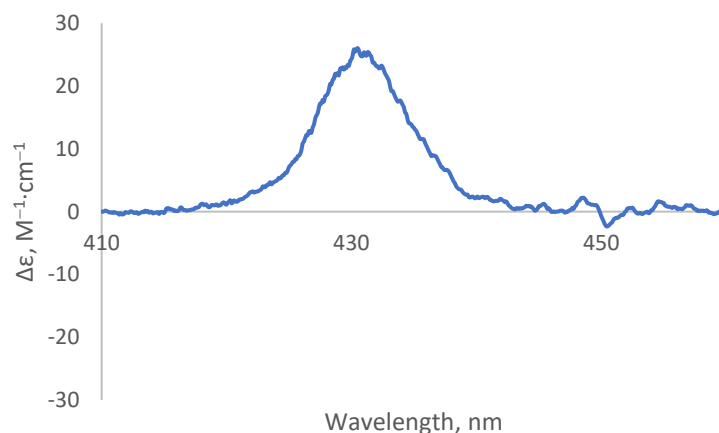

**Figure S67.** Experimental CD spectrum generated by mixing **P6** ( $2.1 \cdot 10^{-6}$  M, CH<sub>2</sub>Cl<sub>2</sub>, 293 K) and **1c** ( $1.8 \cdot 10^{-2}$  M), >99% conversion to complex.



Spectroscopic data of system **1c** + **P7**

**Table S19.** Absorptions (AU) of **P7** ( $2.0 \times 10^{-6}$  M) derived from the UV-Vis titration of **P7** with **1c** in  $\text{CH}_2\text{Cl}_2$  and concentrations of **1c** at 293 K.

| Sample no | AU 420.6 nm | AU 432.6 nm | $C_{1c}$ , M         |
|-----------|-------------|-------------|----------------------|
| 1         | 0.850       | 0.094       | 0.00                 |
| 2         | 0.689       | 0.255       | $1.13 \cdot 10^{-5}$ |
| 3         | 0.579       | 0.367       | $2.26 \cdot 10^{-5}$ |
| 4         | 0.503       | 0.441       | $3.38 \cdot 10^{-5}$ |
| 5         | 0.446       | 0.497       | $4.50 \cdot 10^{-5}$ |
| 6         | 0.402       | 0.543       | $5.62 \cdot 10^{-5}$ |
| 7         | 0.339       | 0.605       | $7.85 \cdot 10^{-5}$ |
| 8         | 0.320       | 0.621       | $8.96 \cdot 10^{-5}$ |
| 9         | 0.284       | 0.657       | $1.12 \cdot 10^{-4}$ |
| 10        | 0.260       | 0.681       | $1.34 \cdot 10^{-4}$ |
| 11        | 0.240       | 0.701       | $1.56 \cdot 10^{-4}$ |
| 12        | 0.223       | 0.718       | $1.77 \cdot 10^{-4}$ |
| 13        | 0.205       | 0.732       | $2.21 \cdot 10^{-4}$ |
| 14        | 0.189       | 0.748       | $2.64 \cdot 10^{-4}$ |
| 15        | 0.177       | 0.761       | $3.06 \cdot 10^{-4}$ |
| 16        | 0.163       | 0.772       | $3.90 \cdot 10^{-4}$ |
| 17        | 0.152       | 0.783       | $4.73 \cdot 10^{-4}$ |
| 18        | 0.143       | 0.783       | $5.53 \cdot 10^{-4}$ |
| 19        | 0.138       | 0.797       | $6.33 \cdot 10^{-4}$ |

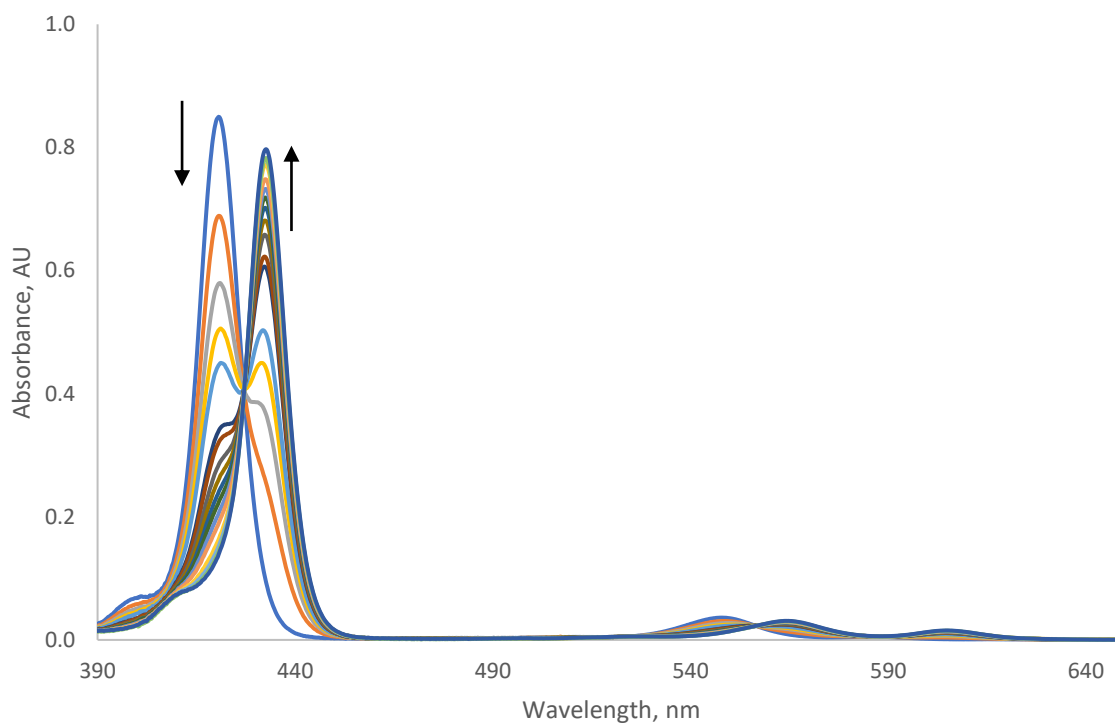

**Figure S68.** Changes in UV-Vis spectrum of **P7** ( $2.0 \times 10^{-6}$  M,  $\text{CH}_2\text{Cl}_2$ , 293 K) caused by portion-wise addition of guest **1c** ( $0$ – $6.63 \cdot 10^{-4}$  M).

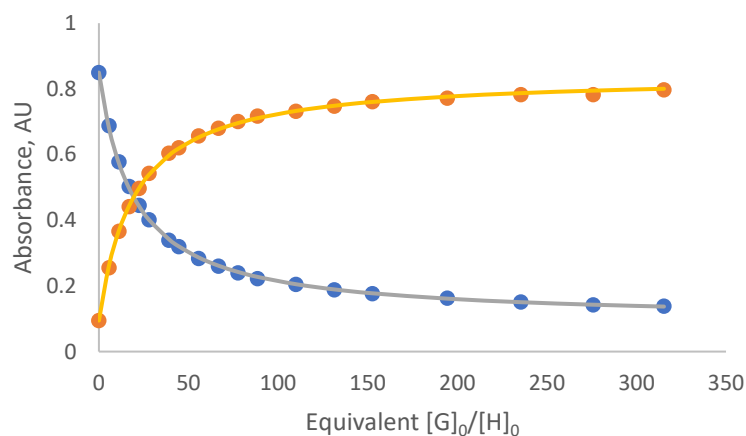

**Figure S69.** UV-Vis experimental (points) and 1:1 fitted (line) titration curves of **P7** and **1c** in  $\text{CH}_2\text{Cl}_2$ .  $[\text{G}]_0/[\text{H}]_0$  defines the ratio of **1c** guest and **P7** host. Blue points – absorption at 420.6 nm, orange points – absorption at 432.6 nm.

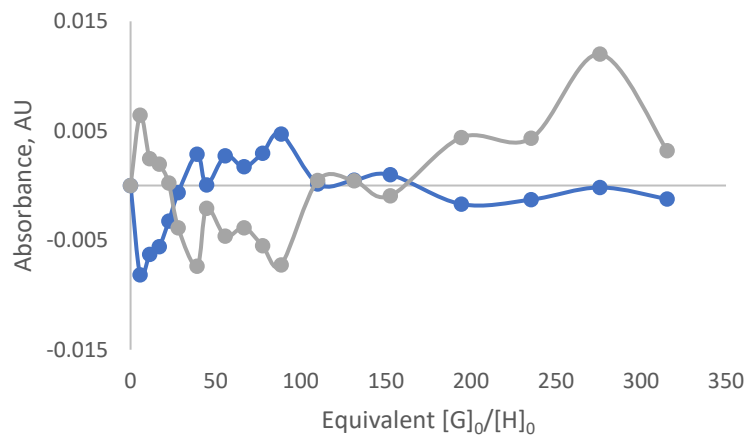

**Figure S70.** Residual analysis of UV-Vis titration between **P7** and **1c** in  $\text{CH}_2\text{Cl}_2$  using 1:1 model.  $[\text{G}]_0/[\text{H}]_0$  defines the ratio of **1c** guest and **P7** host. Blue points – absorption at 420.6 nm, grey points – absorption at 432.6 nm.

$$K_a (\mathbf{1c} + \mathbf{P7}) = (2.66 \pm 0.03) \times 10^4 \text{ M}^{-1}$$

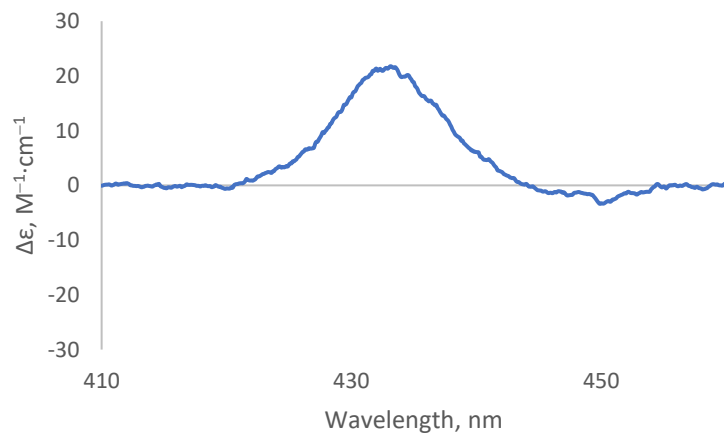

**Figure S71.** Experimental CD spectrum generated by mixing **P7** ( $2.0 \cdot 10^{-6} \text{ M}$ ,  $\text{CH}_2\text{Cl}_2$ , 293 K) and **1c** ( $6.0 \cdot 10^{-3} \text{ M}$ ), 95% conversion to complex.

### Spectroscopic data of system **1c** + **P8**

**Table S20.** Absorptions (AU) of **P8** ( $2.0 \times 10^{-6}$  M) derived from the UV-Vis titration of **P8** with **1c** in  $\text{CH}_2\text{Cl}_2$  and concentrations of **1c** at 293 K.

| Sample no | AU 412.8 nm | AU 425.0 nm | $C_{1c}$ , M         |
|-----------|-------------|-------------|----------------------|
| 1         | 0.960       | 0.022       | 0.00                 |
| 2         | 0.931       | 0.051       | $6.15 \cdot 10^{-7}$ |
| 3         | 0.892       | 0.079       | $1.23 \cdot 10^{-6}$ |
| 4         | 0.849       | 0.145       | $1.84 \cdot 10^{-6}$ |
| 5         | 0.796       | 0.200       | $2.45 \cdot 10^{-6}$ |
| 6         | 0.750       | 0.252       | $3.06 \cdot 10^{-6}$ |
| 7         | 0.707       | 0.300       | $3.67 \cdot 10^{-6}$ |
| 8         | 0.660       | 0.352       | $4.28 \cdot 10^{-6}$ |
| 9         | 0.633       | 0.384       | $4.88 \cdot 10^{-6}$ |
| 10        | 0.605       | 0.414       | $5.49 \cdot 10^{-6}$ |
| 11        | 0.580       | 0.441       | $6.09 \cdot 10^{-6}$ |
| 12        | 0.557       | 0.468       | $6.69 \cdot 10^{-6}$ |
| 13        | 0.536       | 0.492       | $7.29 \cdot 10^{-6}$ |
| 14        | 0.518       | 0.512       | $7.89 \cdot 10^{-6}$ |
| 15        | 0.500       | 0.532       | $8.48 \cdot 10^{-6}$ |
| 16        | 0.469       | 0.567       | $9.67 \cdot 10^{-6}$ |
| 17        | 0.450       | 0.587       | $1.09 \cdot 10^{-5}$ |
| 18        | 0.422       | 0.619       | $1.20 \cdot 10^{-5}$ |
| 19        | 0.388       | 0.659       | $1.44 \cdot 10^{-5}$ |

|    |       |       |                      |
|----|-------|-------|----------------------|
| 20 | 0.358 | 0.691 | $1.67 \cdot 10^{-5}$ |
| 21 | 0.325 | 0.728 | $2.01 \cdot 10^{-5}$ |
| 22 | 0.297 | 0.760 | $2.35 \cdot 10^{-5}$ |
| 23 | 0.271 | 0.791 | $2.80 \cdot 10^{-5}$ |
| 24 | 0.252 | 0.812 | $3.23 \cdot 10^{-5}$ |
| 25 | 0.224 | 0.845 | $4.09 \cdot 10^{-5}$ |
| 26 | 0.201 | 0.873 | $5.31 \cdot 10^{-5}$ |
| 27 | 0.180 | 0.899 | $7.03 \cdot 10^{-5}$ |
| 28 | 0.165 | 0.918 | $8.62 \cdot 10^{-5}$ |
| 29 | 0.156 | 0.931 | $1.01 \cdot 10^{-4}$ |

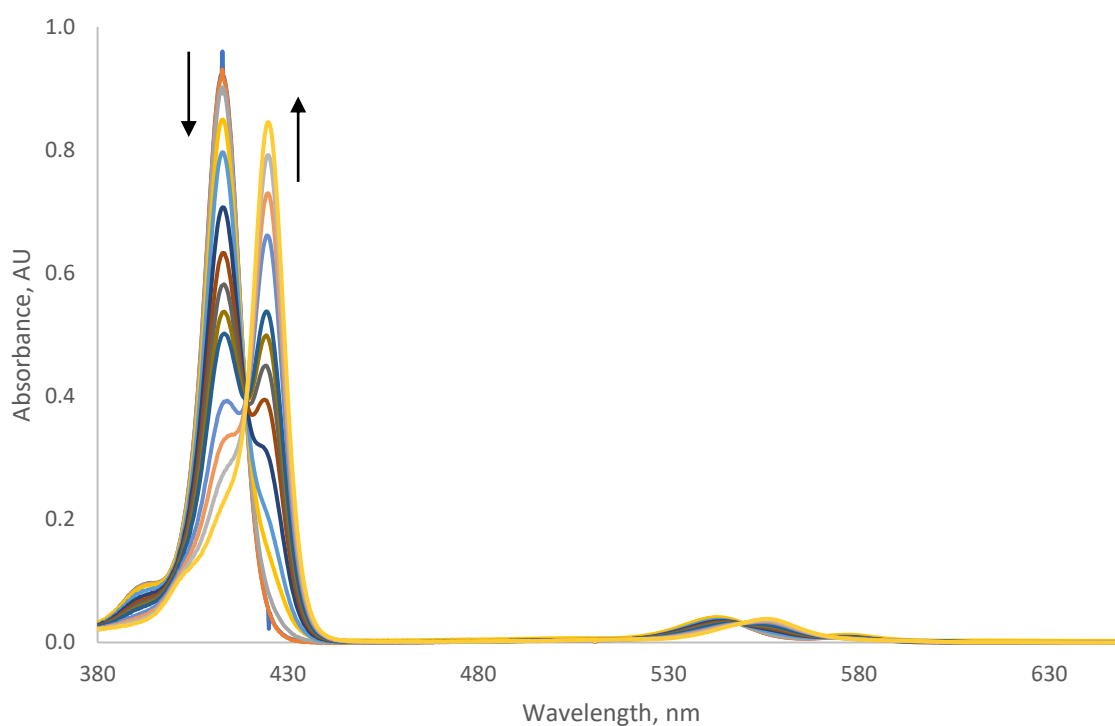

**Figure S72.** Changes in UV-Vis spectrum of **P8** ( $2.0 \times 10^{-6}$  M,  $\text{CH}_2\text{Cl}_2$ , 293 K) caused by portion-wise addition of guest **1c** ( $0 - 1.01 \cdot 10^{-4}$  M).

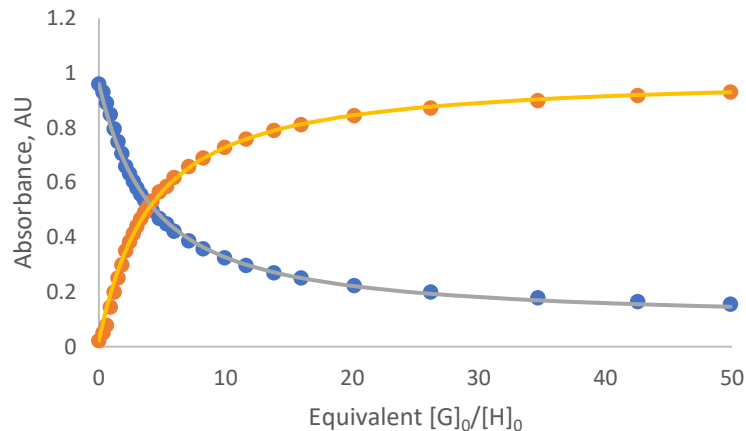

**Figure S73.** UV-Vis experimental (points) and 1:1 fitted (line) titration curves of **P8** and **1c** in CH<sub>2</sub>Cl<sub>2</sub>. [G]<sub>0</sub>/[H]<sub>0</sub> defines the ratio of **1c** guest and **P8** host. Blue points – absorption at 412.8 nm, orange points – absorption at 425.0 nm.

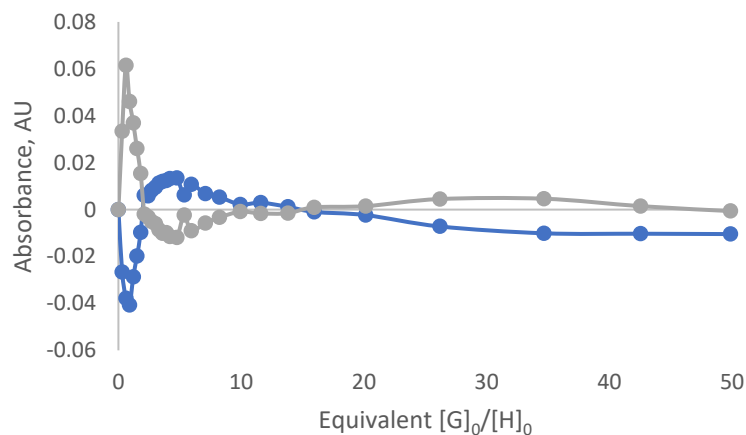

**Figure S74.** Residual analysis of UV-Vis titration between **P8** and **1c** in CH<sub>2</sub>Cl<sub>2</sub> using 1:1 model. [G]<sub>0</sub>/[H]<sub>0</sub> defines the ratio of **1c** guest and **P8** host. Blue points – absorption at 412.8 nm, grey points – absorption at 425.0 nm.

$$K_a (\mathbf{1c} + \mathbf{P8}) = (1.41 \pm 0.04) \times 10^5 \text{ M}^{-1}$$

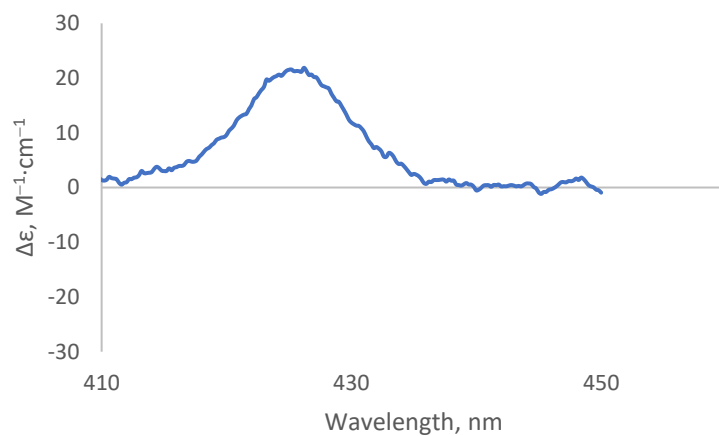

**Figure S75.** Experimental CD spectrum generated by mixing **P8** ( $2.1\cdot 10^{-6}$  M,  $\text{CH}_2\text{Cl}_2$ , 293 K) and **1c** ( $1.4\cdot 10^{-4}$  M), 92% conversion to complex.

#### Spectroscopic data of system **1d** + **P8**

**Table S21.** Absorptions (AU) of **P8** ( $2.3\cdot 10^{-6}$  M) derived from the UV-Vis titration of **P8** with **1d** in  $\text{CH}_2\text{Cl}_2$  and concentrations of **1d** at 293 K.

| Sample no | AU 412.8 nm | AU 425.0 nm | $C_{1d}$ , M        |
|-----------|-------------|-------------|---------------------|
| 1         | 1.047       | 0.072       | 0.00                |
| 2         | 1.027       | 0.088       | $1.96\cdot 10^{-5}$ |
| 3         | 1.016       | 0.104       | $3.92\cdot 10^{-5}$ |
| 4         | 0.999       | 0.118       | $7.83\cdot 10^{-5}$ |
| 5         | 0.979       | 0.132       | $1.17\cdot 10^{-4}$ |
| 6         | 0.960       | 0.148       | $1.56\cdot 10^{-4}$ |
| 7         | 0.939       | 0.166       | $1.94\cdot 10^{-4}$ |
| 8         | 0.922       | 0.182       | $2.33\cdot 10^{-4}$ |
| 9         | 0.899       | 0.201       | $3.09\cdot 10^{-4}$ |
| 10        | 0.875       | 0.223       | $3.84\cdot 10^{-4}$ |

|    |       |       |                      |
|----|-------|-------|----------------------|
| 11 | 0.843 | 0.249 | $4.96 \cdot 10^{-4}$ |
| 12 | 0.811 | 0.275 | $6.06 \cdot 10^{-4}$ |
| 13 | 0.778 | 0.305 | $7.51 \cdot 10^{-4}$ |
| 14 | 0.747 | 0.330 | $8.93 \cdot 10^{-4}$ |
| 15 | 0.718 | 0.358 | $1.03 \cdot 10^{-3}$ |
| 16 | 0.684 | 0.390 | $1.17 \cdot 10^{-3}$ |
| 17 | 0.659 | 0.413 | $1.30 \cdot 10^{-3}$ |
| 18 | 0.635 | 0.437 | $1.44 \cdot 10^{-3}$ |
| 19 | 0.602 | 0.467 | $1.69 \cdot 10^{-3}$ |
| 20 | 0.574 | 0.494 | $1.94 \cdot 10^{-3}$ |
| 21 | 0.533 | 0.536 | $2.30 \cdot 10^{-3}$ |
| 22 | 0.500 | 0.570 | $2.64 \cdot 10^{-3}$ |
| 23 | 0.459 | 0.616 | $3.12 \cdot 10^{-3}$ |
| 24 | 0.426 | 0.653 | $3.57 \cdot 10^{-3}$ |
| 25 | 0.394 | 0.694 | $3.99 \cdot 10^{-3}$ |
| 26 | 0.374 | 0.723 | $4.39 \cdot 10^{-3}$ |
| 27 | 0.354 | 0.750 | $4.76 \cdot 10^{-3}$ |
| 28 | 0.346 | 0.772 | $4.90 \cdot 10^{-3}$ |
| 29 | 0.330 | 0.790 | $5.19 \cdot 10^{-3}$ |
| 30 | 0.319 | 0.810 | $5.94 \cdot 10^{-3}$ |
| 31 | 0.302 | 0.830 | $7.04 \cdot 10^{-3}$ |



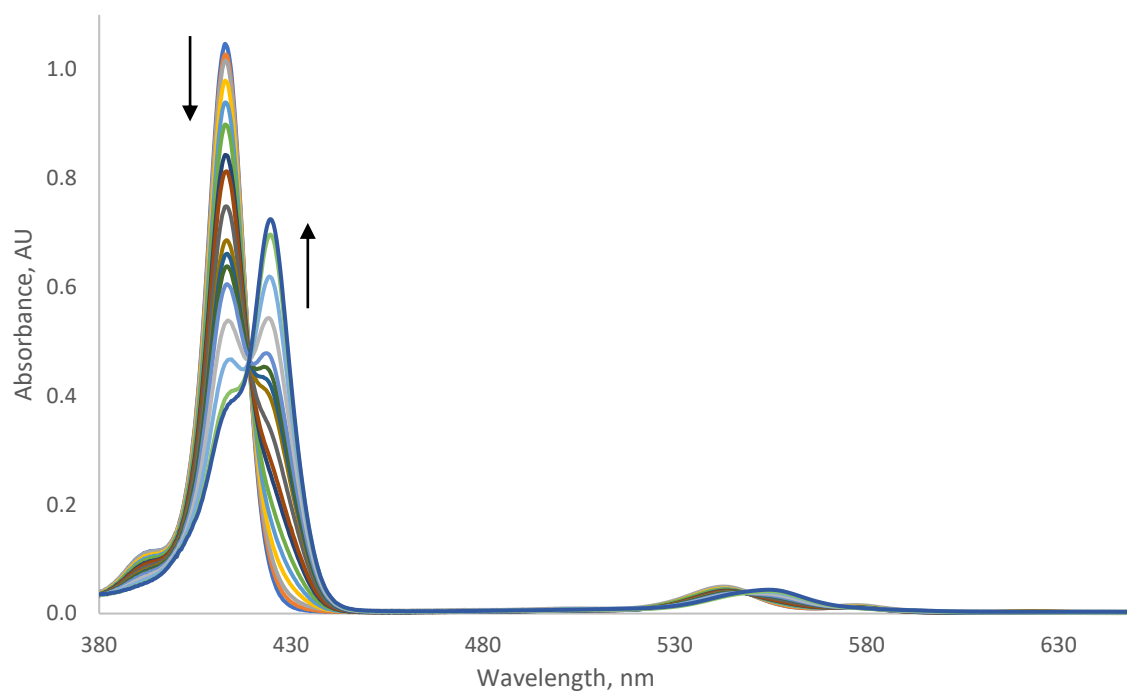

**Figure S76.** Changes in UV-Vis spectrum of **P8** ( $2.3 \times 10^{-6}$  M,  $\text{CH}_2\text{Cl}_2$ , 293 K) caused by portion-wise addition of guest **1d** ( $0-7.04 \cdot 10^{-3}$  M).

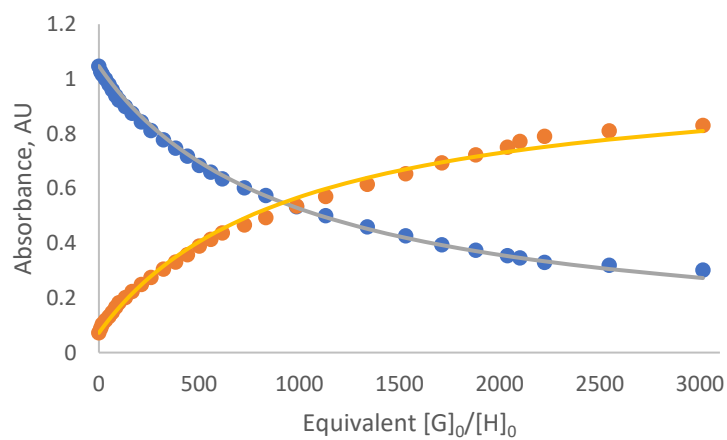

**Figure S77.** UV-Vis experimental (points) and 1:1 fitted (line) titration curves of **P8** and **1d** in  $\text{CH}_2\text{Cl}_2$ .  $[\text{G}]_0/[\text{H}]_0$  defines the ratio of **1d** guest and **P8** host. Blue points – absorbance at 412.8 nm, orange points – absorbance at 425.0 nm.

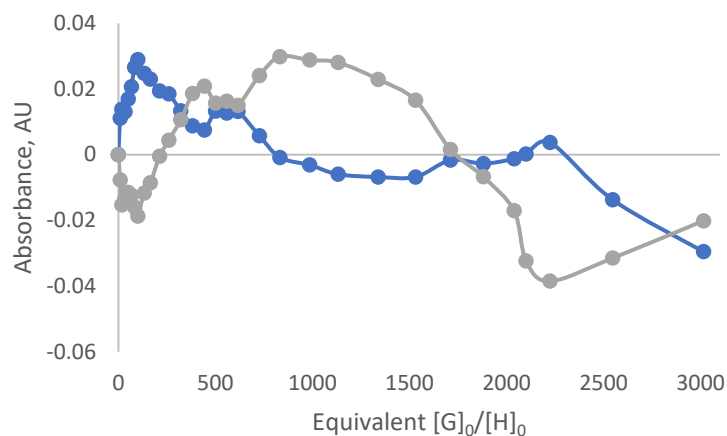

**Figure S78.** Residual analysis of UV-Vis titration between **P8** and **1d** in  $\text{CH}_2\text{Cl}_2$  using 1:1 model.  $[\text{G}]_0/[\text{H}]_0$  defines the ratio of **1d** guest and **P8** host. Blue points – absorption at 412.8 nm, grey points – absorption at 425.0 nm.

$$K_a (\mathbf{1d} + \mathbf{P8}) = (4.5 \pm 0.1) \times 10^2 \text{ M}^{-1}$$

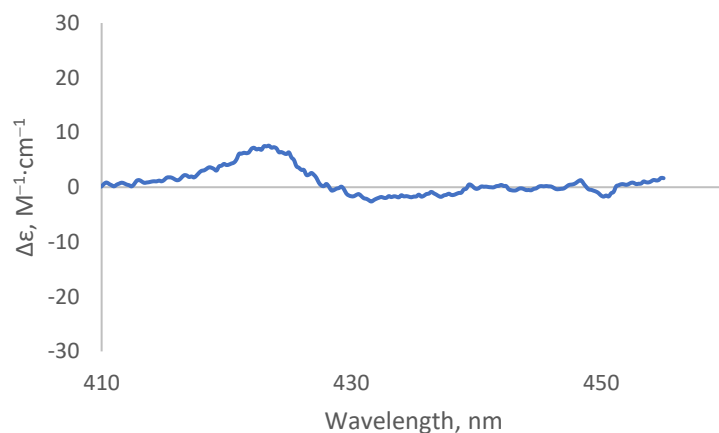

**Figure S79.** Experimental CD spectrum generated by mixing **P8** ( $2.3 \cdot 10^{-6} \text{ M}$ ,  $\text{CH}_2\text{Cl}_2$ , 293 K) and **1d** ( $1.8 \cdot 10^{-2} \text{ M}$ ), 90% conversion to complex.

### Spectroscopic data of system **1d** + **P9**

**Table S22.** Absorptions (AU) of **P9** ( $1.9 \times 10^{-6}$  M) derived from the UV-Vis titration of **P9** with **1d** in  $\text{CH}_2\text{Cl}_2$  and concentrations of **1d** at 293 K.

| Sample no | AU 455.8 nm | AU 472.4 nm | $C_{1d}$ , M         |
|-----------|-------------|-------------|----------------------|
| 1         | 0.368       | 0.187       | 0.00                 |
| 2         | 0.326       | 0.210       | $2.59 \cdot 10^{-5}$ |
| 3         | 0.297       | 0.227       | $5.18 \cdot 10^{-5}$ |
| 4         | 0.276       | 0.240       | $7.75 \cdot 10^{-5}$ |
| 5         | 0.261       | 0.250       | $1.03 \cdot 10^{-4}$ |
| 6         | 0.248       | 0.260       | $1.29 \cdot 10^{-4}$ |
| 7         | 0.240       | 0.267       | $1.55 \cdot 10^{-4}$ |
| 8         | 0.228       | 0.277       | $2.06 \cdot 10^{-4}$ |
| 9         | 0.221       | 0.285       | $2.56 \cdot 10^{-4}$ |
| 10        | 0.212       | 0.293       | $3.57 \cdot 10^{-4}$ |
| 11        | 0.206       | 0.299       | $5.07 \cdot 10^{-4}$ |
| 12        | 0.201       | 0.305       | $7.03 \cdot 10^{-4}$ |
| 13        | 0.198       | 0.309       | $8.95 \cdot 10^{-4}$ |
| 14        | 0.196       | 0.310       | $1.08 \cdot 10^{-3}$ |
| 15        | 0.196       | 0.312       | $1.27 \cdot 10^{-3}$ |

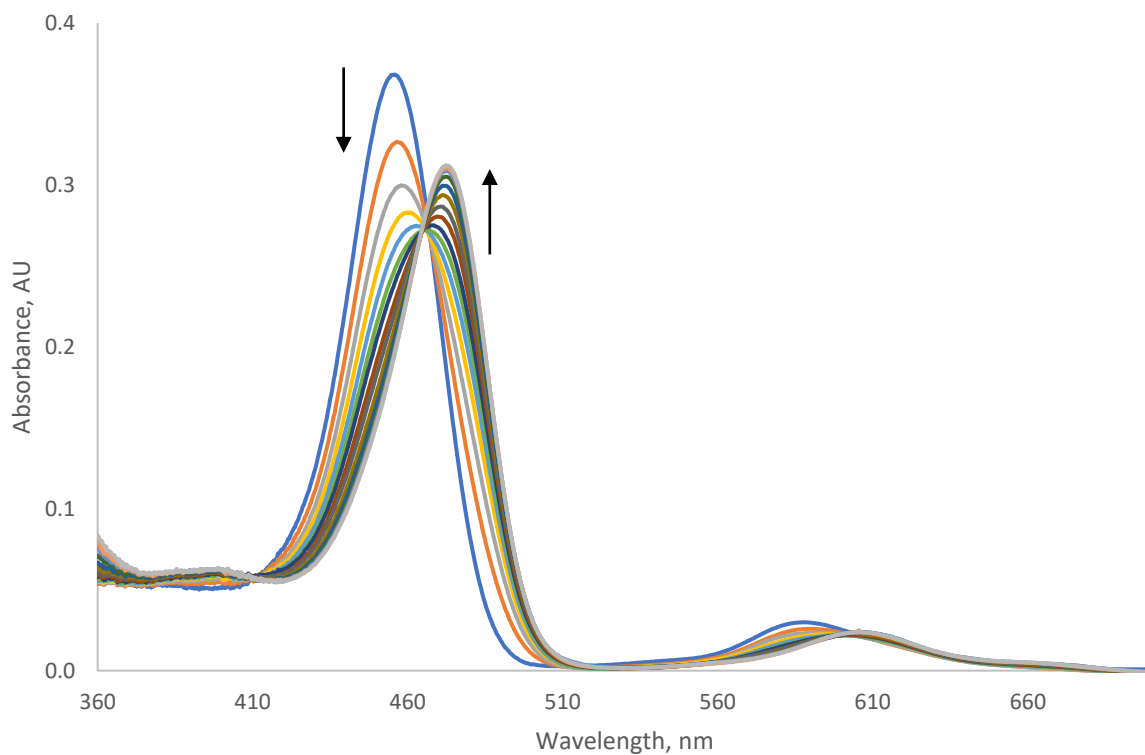

**Figure S80.** Changes in UV-Vis spectrum of **P9** ( $1.9 \times 10^{-6}$  M,  $\text{CH}_2\text{Cl}_2$ , 293 K) caused by portion-wise addition of guest **1d** ( $0$ – $1.27 \cdot 10^{-3}$  M).

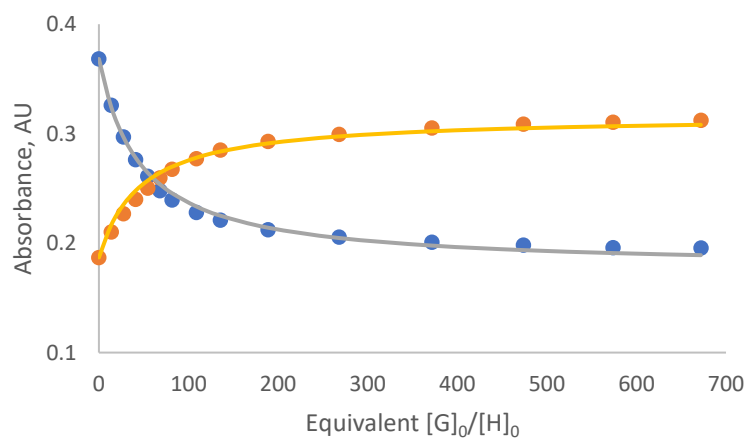

**Figure S81.** UV-Vis experimental (points) and 1:1 fitted (line) titration curves of **P9** and **1d** in  $\text{CH}_2\text{Cl}_2$ .  $[\text{G}]_0/[\text{H}]_0$  defines the ratio of **1d** guest and **P9** host. Blue points – absorbance at 455.8 nm, orange points – absorbance at 472.4 nm.

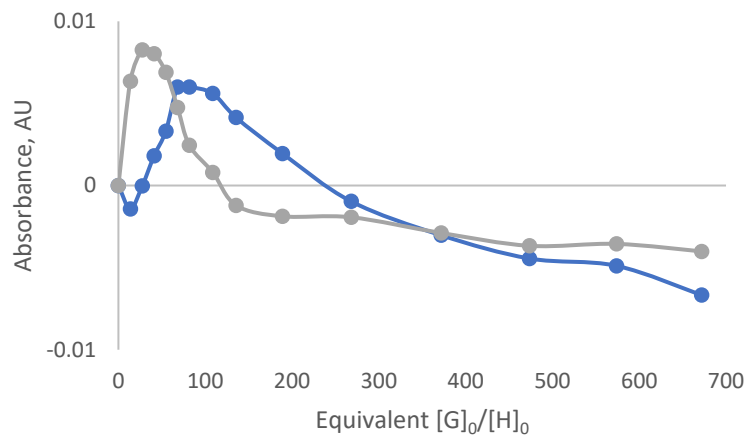

**Figure S82.** Residual analysis of UV-Vis titration between **P9** and **1d** in  $\text{CH}_2\text{Cl}_2$  using 1:1 model.  $[\text{G}]_0/[\text{H}]_0$  defines the ratio of **1d** guest and **P9** host. Blue points – absorption at 455.8 nm, grey points – absorption at 472.4 nm.

$$K_a (\mathbf{1d} + \mathbf{P9}) = (1.16 \pm 0.07) \times 10^4 \text{ M}^{-1}$$

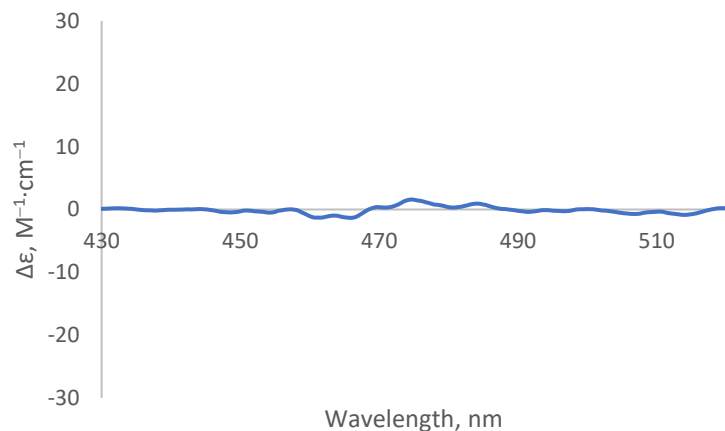

**Figure S83.** Experimental CD spectrum generated by mixing **P9** ( $4.0 \cdot 10^{-6} \text{ M}$ ,  $\text{CH}_2\text{Cl}_2$ , 293 K) and **1d** ( $1.3 \cdot 10^{-3} \text{ M}$ ), 96% conversion to complex.

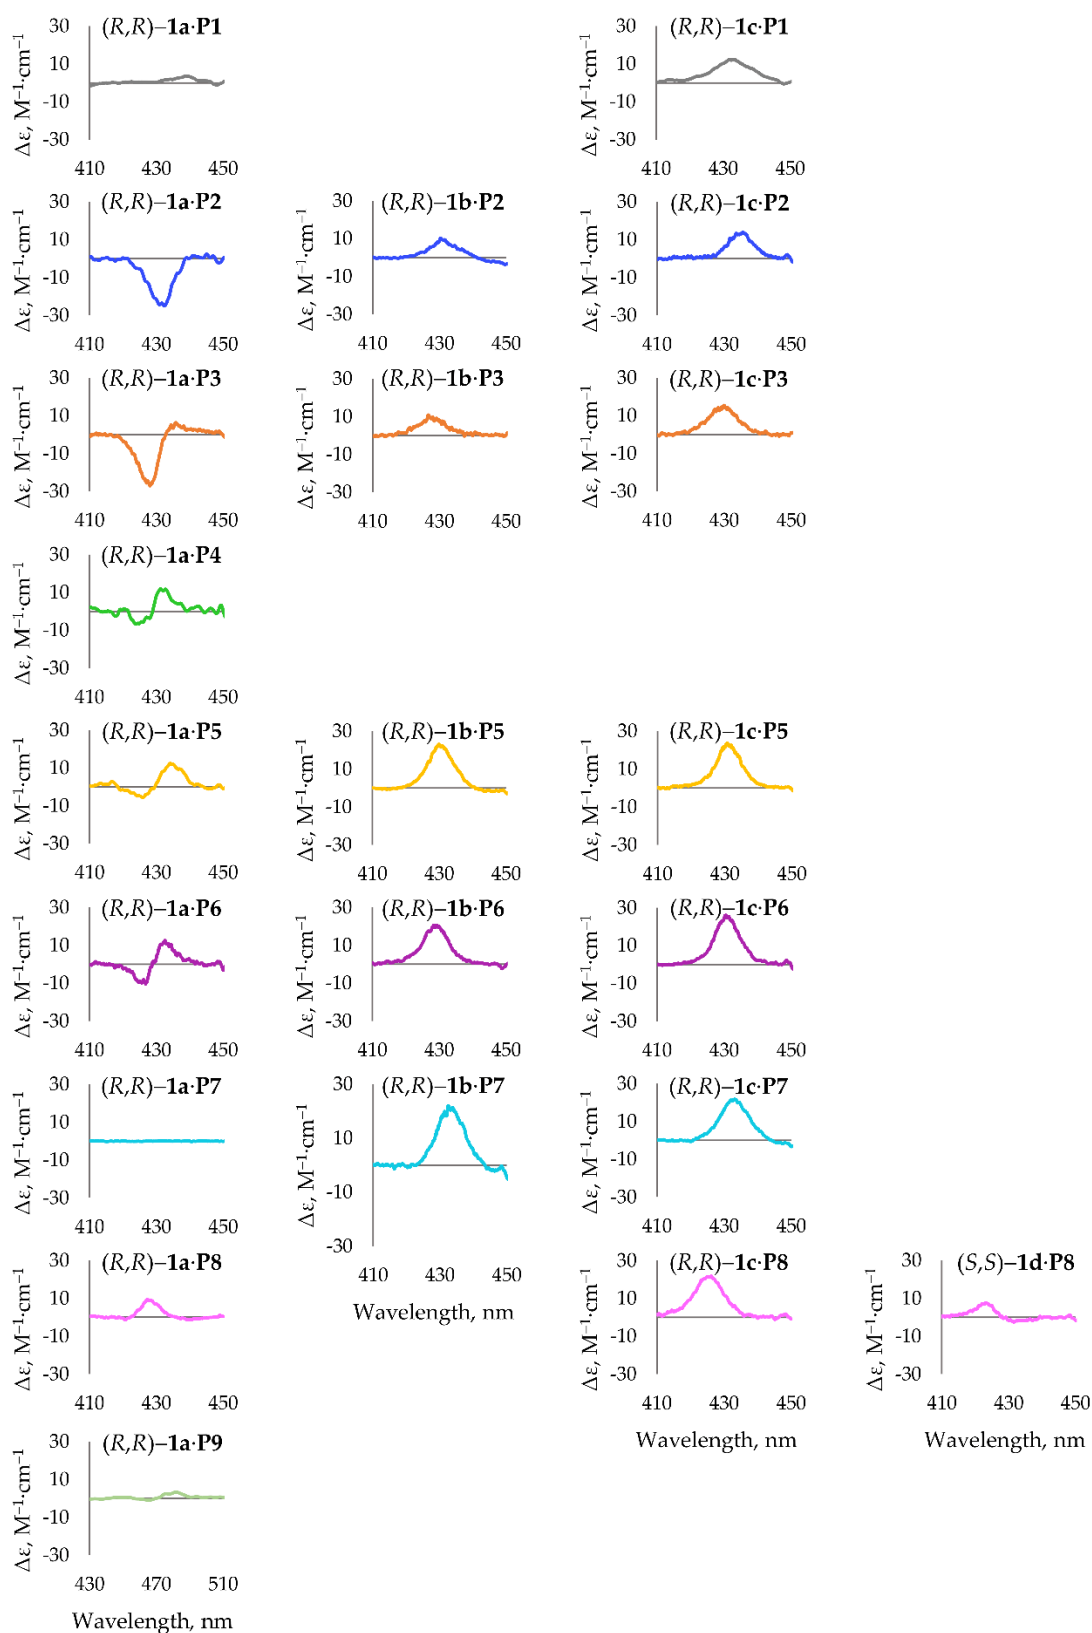

**Figure S84.** Overview of experimental CD spectra obtained for the complexes of thioureas **1a-d** with zinc porphyrins **P1-P9** ( $\text{CH}_2\text{Cl}_2$ , 293 K).

## 2. UV-Vis and CD spectra of compound 1a

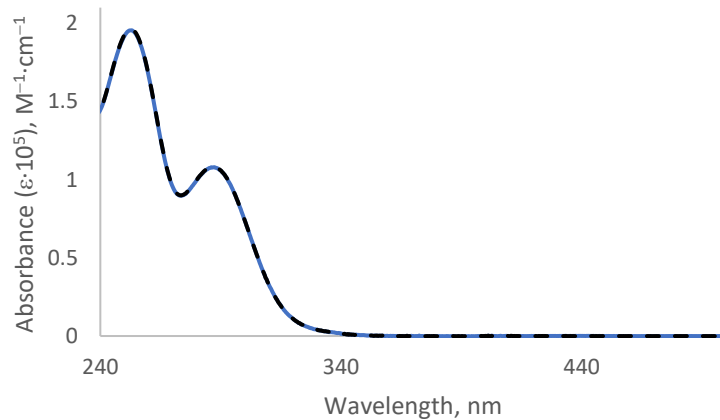

**Figure S85.** Experimental UV-Vis spectra of (*R,R*)-**1a** ( $5.25 \cdot 10^{-5}$  M,  $CH_2Cl_2$ , 293 K, blue solid line) and (*S,S*)-**1a** ( $5.24 \cdot 10^{-5}$  M,  $CH_2Cl_2$ , 293 K, black dotted line). The solvent cutoff is at 239 nm.

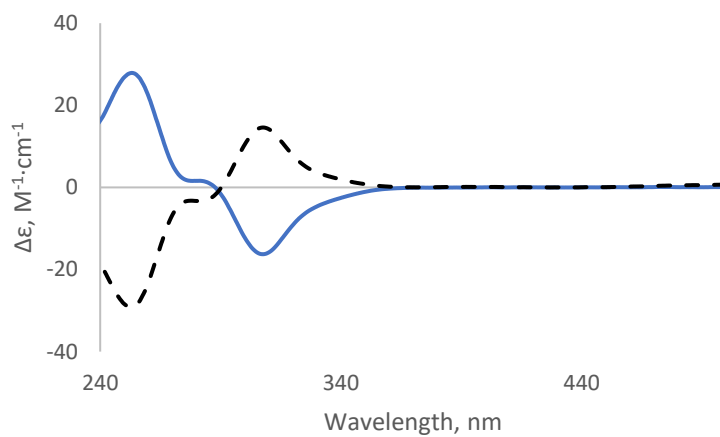

**Figure S86.** Experimental CD spectra of (*R,R*)-**1a** ( $5.25 \cdot 10^{-5}$  M,  $CH_2Cl_2$ , 293 K, blue solid line) and (*S,S*)-**1a** ( $5.24 \cdot 10^{-5}$  M,  $CH_2Cl_2$ , 293 K, black dotted line). The solvent cutoff is at 239 nm.

### 3. NSD distortion analysis for the porphyrin core in 1b-P5 complex

The porphyrin core was extracted from X-ray data (CCDC 2081478). All atoms were deleted except 24 atoms of the porphyrin core. The porphyrin core was subjected to NSD analysis with on-line tool [2–4].

**Table S23.** Summary of the NSD (in Å)

| <b>basis</b> | <b><math>\Delta_{ip}</math></b>  | <b><math>\delta_{ip}</math></b>  | <b><math>B_{2g}</math></b> | <b><math>B_{1g}</math></b> | <b><math>E_u(x)</math></b> | <b><math>E_u(y)</math></b> | <b><math>A_{1g}</math></b> | <b><math>A_{2g}</math></b> |
|--------------|----------------------------------|----------------------------------|----------------------------|----------------------------|----------------------------|----------------------------|----------------------------|----------------------------|
| min.         | 0.20                             | 0.00                             | 0.00                       | 0.01                       | 0.00                       | 0.02                       | 0.20                       | -0.01                      |
| ext.         | 0.20                             | 0.00                             | 0.00                       | 0.01                       | 0.00                       | 0.02                       | 0.20                       | -0.01                      |
|              |                                  |                                  | 0.01                       | 0.00                       | 0.00                       | -0.01                      | -0.02                      | -0.01                      |
| total        | 0.20                             | 0.00                             | 0.00                       | 0.01                       | 0.00                       | 0.02                       | 0.20                       | -0.01                      |
|              |                                  |                                  | 0.01                       | 0.00                       | 0.00                       | -0.01                      | -0.02                      | -0.01                      |
|              |                                  |                                  | -0.01                      | 0.01                       | 0.00                       | 0.00                       | 0.02                       | 0.00                       |
|              |                                  |                                  | 0.00                       | 0.00                       | 0.00                       | 0.00                       | -0.01                      | 0.00                       |
|              |                                  |                                  | 0.00                       | 0.00                       | -0.01                      | 0.00                       | 0.01                       | -0.01                      |
|              |                                  |                                  | 0.01                       | -0.01                      | 0.00                       | 0.00                       | 0.00                       |                            |
|              |                                  |                                  |                            |                            | 0.00                       | 0.01                       |                            |                            |
|              |                                  |                                  |                            |                            | 0.01                       | 0.00                       |                            |                            |
|              |                                  |                                  |                            |                            | 0.01                       | 0.00                       |                            |                            |
|              |                                  |                                  |                            |                            | 0.00                       | 0.00                       |                            |                            |
|              |                                  |                                  |                            |                            | 0.00                       | 0.00                       |                            |                            |
| comp.        | 0.20                             | 0.00                             | 0.01                       | 0.01                       | 0.02                       | 0.02                       | 0.20                       | 0.02                       |
| <b>basis</b> | <b><math>\Delta_{oop}</math></b> | <b><math>\delta_{oop}</math></b> | <b><math>B_{2u}</math></b> | <b><math>B_{1u}</math></b> | <b><math>A_{2u}</math></b> | <b><math>E_g(x)</math></b> | <b><math>E_g(y)</math></b> | <b><math>A_{1u}</math></b> |
| min.         | 0.45                             | 0.00                             | 0.35                       | -0.24                      | 0.02                       | 0.03                       | 0.14                       | 0.00                       |
| ext.         | 0.46                             | 0.00                             | 0.35                       | -0.24                      | 0.02                       | 0.03                       | 0.14                       | 0.00                       |
|              |                                  |                                  | -0.06                      | 0.00                       | 0.02                       | -0.06                      | 0.09                       | 0.00                       |
| total        | 0.46                             | 0.00                             | 0.35                       | -0.24                      | 0.02                       | 0.03                       | 0.14                       | 0.00                       |
|              |                                  |                                  | -0.06                      | 0.00                       | 0.02                       | -0.06                      | 0.09                       | 0.00                       |
|              |                                  |                                  | 0.00                       | 0.00                       | -0.01                      | 0.01                       | 0.00                       |                            |
|              |                                  |                                  |                            |                            |                            | 0.01                       | -0.01                      |                            |
|              |                                  |                                  |                            |                            |                            | 0.00                       | 0.01                       |                            |
| comp.        | 0.46                             | 0.00                             | 0.35                       | 0.24                       | 0.03                       | 0.07                       | 0.17                       | 0.00                       |



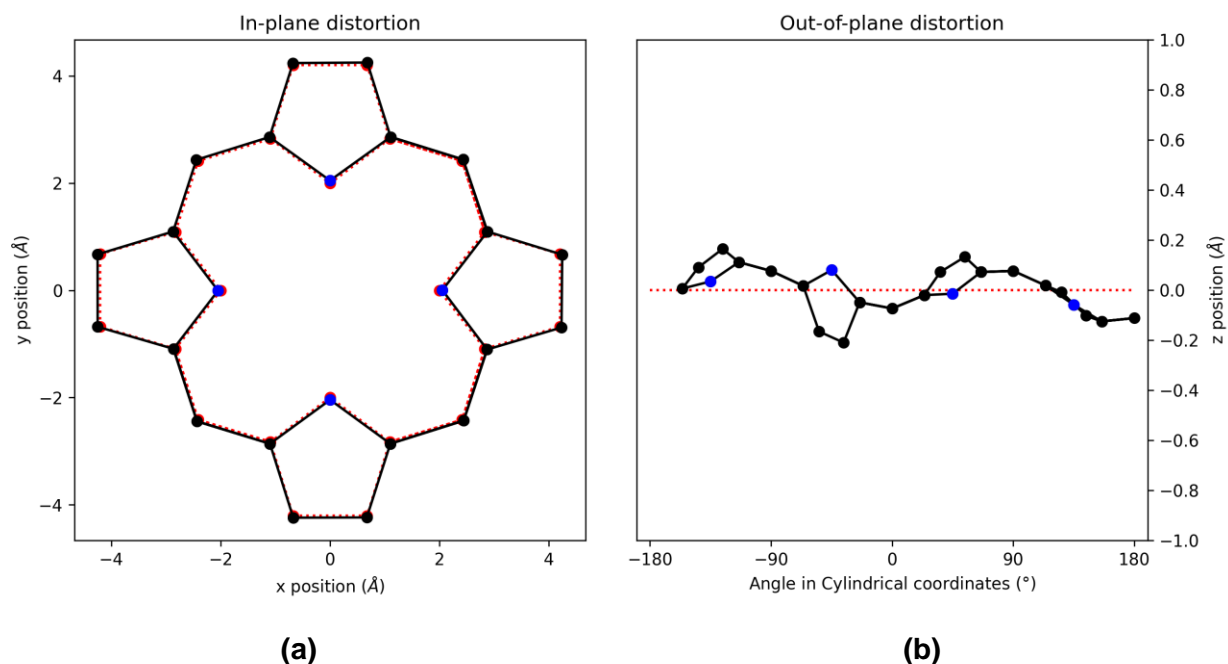

**Figure S87.** (a) in-plane and (b) out-of-plane skeletal plots of the porphyrin core. Porphyrin is represented in black (C) and blue (N), with the reference structure (CuTPP) in red dotted lines.

**Table S24.** Summary of structural parameters

| Bond Distances,<br>Bond Angles,<br>Atom Displacements | Mean Value<br>(standard error) | Units |
|-------------------------------------------------------|--------------------------------|-------|
| N–C <sub>a</sub>                                      | 1.373(6)                       | (Å)   |
| C <sub>a</sub> –C <sub>b</sub>                        | 1.444(6)                       | (Å)   |
| C <sub>a</sub> –C <sub>m</sub>                        | 1.405(9)                       | (Å)   |
| C <sub>b</sub> –C <sub>b</sub>                        | 1.355(5)                       | (Å)   |
| ∠C <sub>a</sub> C <sub>b</sub> C <sub>b</sub>         | 107.1(3)                       | (°)   |
| ∠NC <sub>a</sub> C <sub>b</sub>                       | 109.6(4)                       | (°)   |
| ∠NC <sub>a</sub> C <sub>m</sub>                       | 125.6(4)                       | (°)   |
| ∠C <sub>a</sub> NC <sub>a</sub>                       | 106.7(4)                       | (°)   |
| ∠C <sub>m</sub> C <sub>a</sub> C <sub>b</sub>         | 124.8(3)                       | (°)   |
| ∠C <sub>a</sub> C <sub>m</sub> C <sub>a</sub>         | 125.4(4)                       | (°)   |
| Δ <sub>24</sub>                                       | 0.0786                         | (Å)   |
| Δ <sub>N</sub>                                        | 0.05(3)                        | (Å)   |
| ΔC <sub>a</sub>                                       | 0.05(5)                        | (Å)   |
| ΔC <sub>b</sub>                                       | 0.12(5)                        | (Å)   |
| ΔC <sub>m</sub>                                       | 0.08(2)                        | (Å)   |
| ∠ pyrrole tilt                                        | 4.7(14)                        | (°)   |
| N···N dist (adj)                                      | 2.897(4)                       | (Å)   |

| Bond Distances,<br>Bond Angles,<br>Atom Displacements | Mean Value<br>(standard error) | Units |
|-------------------------------------------------------|--------------------------------|-------|
| N...N dist (opp)                                      | 4.097(5)                       | (Å)   |

**Table S25.** Porphyrin structure tests

| test                                                              | value                                |
|-------------------------------------------------------------------|--------------------------------------|
| Probable correct structure ( $\Sigma$ residual total values = 0): | True                                 |
| Solution symmetry guess (ip > 0.2, oop > 0.5):                    | D4h                                  |
| Crystal phase symmetry guess (ip > 0.03, oop > 0.1):              | C1                                   |
| Exact centrosymmetry ( $\Sigma \text{ungerade}  > 0.01$ ):        | False                                |
| Approx. centrosymmetry ( $\Sigma \text{ungerade}  > 0.1$ ):       | False                                |
| B <sub>2g</sub> tests:                                            |                                      |
| B <sub>1g</sub> tests:                                            |                                      |
| A <sub>1g</sub> tests:                                            | Expanded porphyrin core<br>(Zn-like) |
| A <sub>2g</sub> tests:                                            |                                      |
| B <sub>2u</sub> tests:                                            |                                      |
| B <sub>1u</sub> tests:                                            |                                      |
| A <sub>2u</sub> tests:                                            |                                      |
| CCDC most similar in plane (leastsq):                             | <a href="#">NANZAG</a>               |
| CCDC most similar out of plane (leastsq):                         | <a href="#">NEFTUN</a>               |
| CCDC most similar in plane (leastsum):                            | <a href="#">HALXEX</a>               |
| CCDC most similar out of plane (leastsum):                        | <a href="#">NEFTUN</a>               |
| PDB most similar in plane (leastsq):                              | <a href="#">1SHR_HEM_A_142</a>       |
| PDB most similar out of plane (leastsq):                          | <a href="#">4YBN_HEM_B_301</a>       |
| PDB most similar in plane (leastsum):                             | <a href="#">2LDO_HEM_A_154</a>       |
| PDB most similar out of plane (leastsum):                         | <a href="#">1MPW_HEM_A_417</a>       |
| mode energy calc:                                                 | 15.4 kJ/mol                          |

#### 4. Determination of dimerization constants for **1a** and **1c** by $^1\text{H}$ NMR spectroscopy

Dimerization constants were determined by tracking changes in the chemical shifts of diagnostic NH protons in **1a** and **1c** upon dilution [5, 6]. To determine the dimerization constants, the experimental data were fitted using numpy (1.18.5) and scipy (1.4.1) libraries of Python 3. Fitting of the experimental data points was performed with the simplest dimerization model [5, 6], which does not take into account the conformational changes [7, 8] and continuous aggregation [9].

Equilibrium constant for a dimerization process is defined as follows:

$$2\text{M} \rightleftharpoons \text{D}, \quad K_{dim} = \frac{[\text{D}]}{[\text{M}]^2} \quad (1),$$

where the sum of monomer  $[\text{M}]$  and dimer  $[\text{D}]$  concentrations gives the initial concentration,  $[\text{M}]_0$

$$[\text{M}]_0 = [\text{M}] + 2[\text{D}] \quad (2)$$

The observed chemical shift,  $\delta_{obs}$ , is defined as follows:

$$\delta_{obs} = \delta_M + (\delta_D - \delta_M)\chi_D \quad (3)$$

$$\delta_{obs} = \delta_M + (\delta_D - \delta_M)\left(1 - \frac{[\text{M}]}{[\text{M}]_0}\right) \quad (4)$$

where  $\delta_M$  and  $\delta_D$  are the chemical shifts of monomer and dimer, respectively, and  $\chi_D$  is the mole fraction of dimer. From the equations (1–4), the following equation (5) was derived and used for fitting the experimental data:

$$K_{dim} = \frac{(\delta_D - \delta_M)(\delta_{obs} - \delta_M)}{2(\delta_D - \delta_{obs})^2 [\text{M}]_0} \quad (5)$$

It was found for both **1a** and **1c** that chemical shifts values remain virtually constant in the concentrations range  $10^{-4}$ – $10^{-2}$  M used for UV-Vis titrations (Figures S86-88 below). This result confirms the dominance of monomeric species in the diluted solutions. The chemical shifts showed a significant change only at concentrations higher than  $10^{-2}$  M.

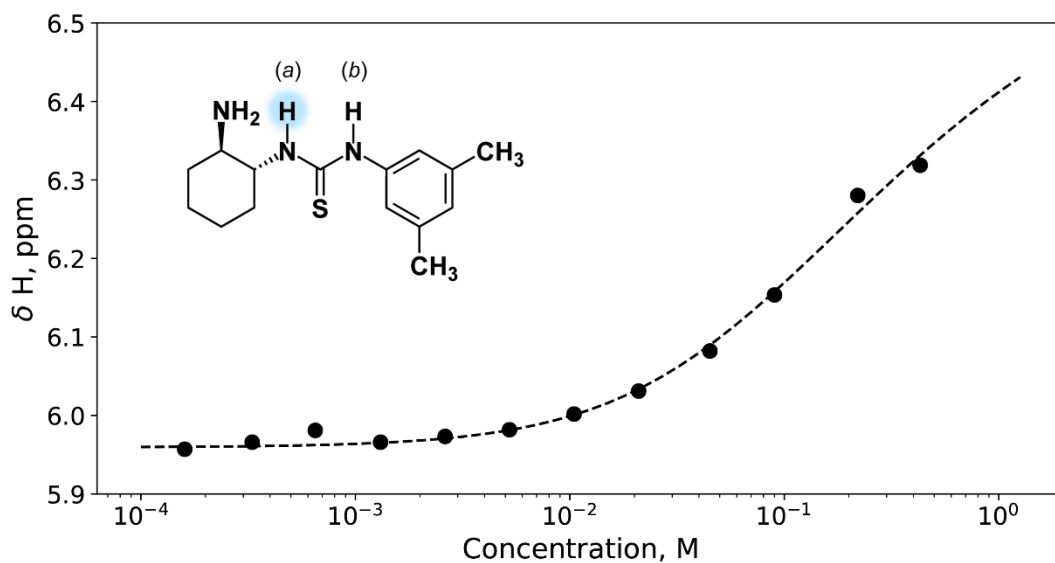

**Figure S88.** Concentration dependence of the chemical shift of NH(a) proton for thiourea **1c** (293 K,  $\text{CDCl}_3$ ).

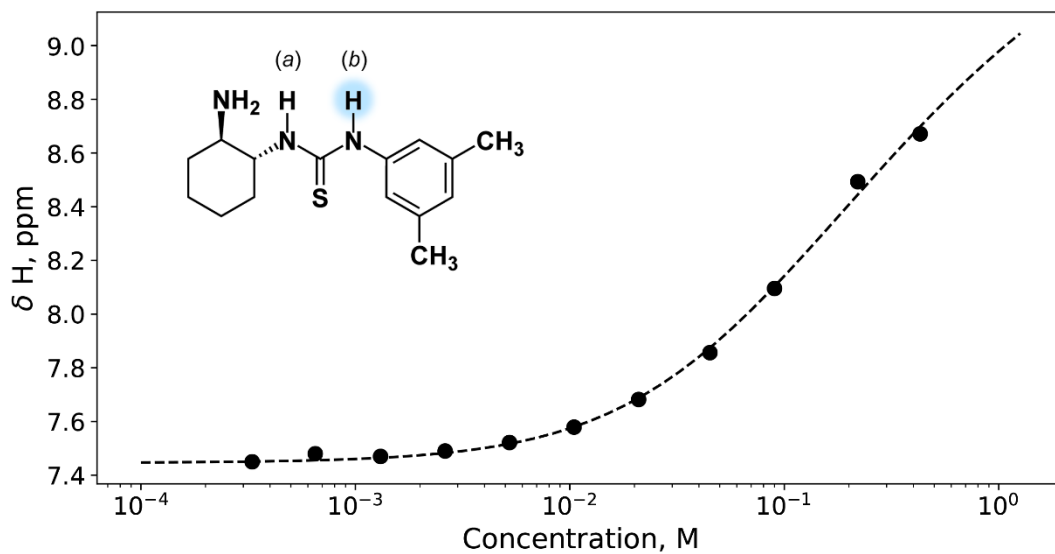

**Figure S89.** Concentration dependence of the chemical shift of NH(b) proton for thiourea **1c** (293 K,  $\text{CDCl}_3$ ).

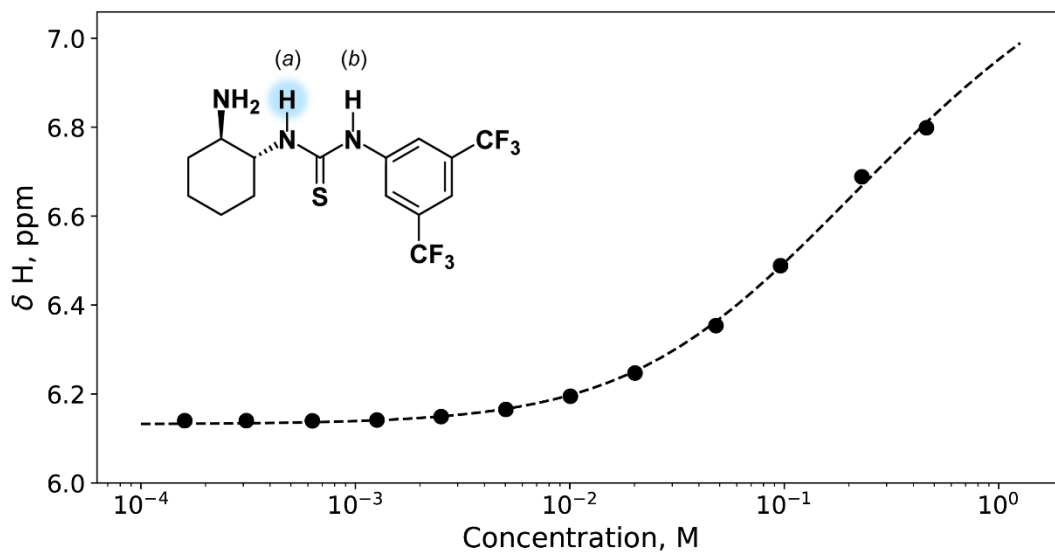

**Figure S90.** Concentration dependence of the chemical shift of NH(a) proton for thiourea **1a** (293 K, CDCl<sub>3</sub>).

**Table S26.** Sample data and fitting results for compound **1c**

| [M] <sub>0</sub> , M        | $\delta_{obs}$ , ppm            |                                 |
|-----------------------------|---------------------------------|---------------------------------|
|                             | NH(a)                           | NH(b)                           |
| 0.43                        | 6.3187                          | 8.6713                          |
| 0.22                        | 6.2802                          | 8.4932                          |
| 0.090                       | 6.1535                          | 8.0953                          |
| 0.045                       | 6.0821                          | 7.8564                          |
| 0.0209                      | 6.0311                          | 7.682                           |
| 0.0105                      | 6.0018                          | 7.579                           |
| 0.00523                     | 5.9818                          | 7.5217                          |
| 0.00262                     | 5.9733                          | 7.49                            |
| 0.00131                     | 5.966                           | 7.47                            |
| 0.00065                     | 5.981                           | 7.48                            |
| 0.00033                     | 5.966                           | 7.45                            |
| 0.00016                     | 5.957                           | –                               |
| $\delta_D$ , ppm            | $6.62 \pm 0.04$                 | $9.72 \pm 0.10$                 |
| $\delta_M$ , ppm            | $5.959 \pm 0.006$               | $7.45 \pm 0.02$                 |
| $K_{dim}$ , M <sup>-1</sup> | <b><math>3.4 \pm 0.6</math></b> | <b><math>3.2 \pm 0.4</math></b> |
| $R^2$                       | 0.995                           | 0.998                           |
| $\chi^2$                    | $1.20 \times 10^{-4}$           | $4.23 \times 10^{-4}$           |

**Table S27.** Sample data and fitting results for compound **1a**

| <b>[M]<sub>0</sub>, M</b>                   | <b><math>\delta_{obs}</math>, ppm</b> |
|---------------------------------------------|---------------------------------------|
|                                             | <b>NH(a)</b>                          |
| 0.46                                        | 6.7986                                |
| 0.23                                        | 6.6884                                |
| 0.096                                       | 6.4885                                |
| 0.048                                       | 6.3538                                |
| 0.0201                                      | 6.2472                                |
| 0.0101                                      | 6.195                                 |
| 0.00503                                     | 6.1653                                |
| 0.00251                                     | 6.1492                                |
| 0.00126                                     | 6.1416                                |
| 0.00063                                     | 6.1398                                |
| 0.00031                                     | 6.1401                                |
| 0.00016                                     | 6.1401                                |
| $\delta_D$ , ppm                            | $7.37 \pm 0.04$                       |
| $\delta_M$ , ppm                            | $6.132 \pm 0.004$                     |
| <b><math>K_{dim}</math>, M<sup>-1</sup></b> | <b><math>2.9 \pm 0.2</math></b>       |
| $R^2$                                       | 0.999                                 |
| $\chi^2$                                    | $1.09 \times 10^{-4}$                 |

## 5. Computational studies

**Table S28.** Electronic energies, zero point energies, enthalpies, entropies, relative energies and Boltzmann distribution of conformer of complex **1a·P6** (two most abundant conformers are highlighted in blue).

|                                          | Complex 1a·P6     |                   |                   |                   |                   |                   |
|------------------------------------------|-------------------|-------------------|-------------------|-------------------|-------------------|-------------------|
| Conformer                                | 1                 | 2                 | 3                 | 4                 | 5                 | 6                 |
| E <sub>electr,def2-SV(P)</sub> . Hartree | -6780.62524395849 | -6780.62656054079 | -6780.62335277556 | -6780.62142767010 | -6780.62802170832 | -6780.61881009232 |
| E <sub>electr,def2-TZVP</sub> . Hartree  | -6786.26514959499 | -6786.26488763996 | -6786.26400398201 | -6786.26110608537 | -6786.26614867179 | -6786.25935256310 |
| ZPE. Hartree                             | 0.9147005         | 0.9149808         | 0.9137806         | 0.9139507         | 0.9147805         | 0.9134594         |
| H. kJ/mol/K                              | 2584.3            | 2587.08           | 2579.83           | 2582.15           | 2584.13           | 2583.95           |
| S. kJ/mol                                | 1.72756           | 1.74105           | 1.7054            | 1.71126           | 1.70668           | 1.74421           |
| Relative energy                          |                   |                   |                   |                   |                   |                   |
| def2-SV(P). kJ/mol                       | 4.66              | 0.00              | 11.69             | 17.34             | 3.35              | 16.29             |
| def2-TZVP. kJ/mol                        | 0.51              | 0.00              | 5.59              | 13.79             | 3.88              | 10.47             |
|                                          |                   |                   |                   |                   |                   |                   |
| Boltzmann. %                             | 37.9              | 46.6              | 4.9               | 0.2               | 9.7               | 0.7               |

**Table S29.** Selected structural parameters for the six conformers of complexes **1a-P6** and **1a-P3** (two most abundant conformers are highlighted in blue).

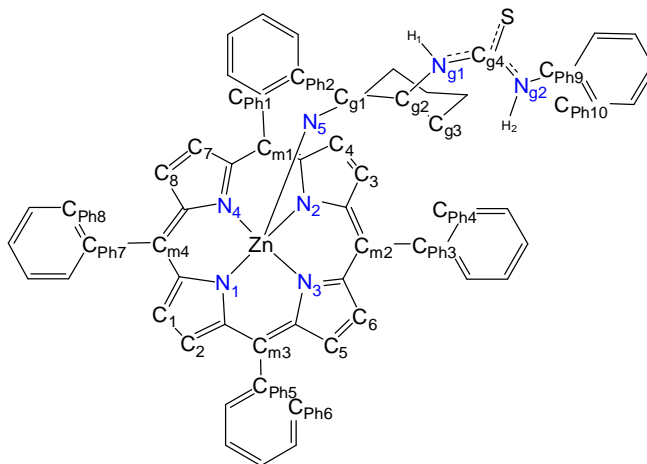

|                                                        | Complex 1a-P6 |        |         |         |        |         | Complex 1a-P3 |        |         |         |        |         |
|--------------------------------------------------------|---------------|--------|---------|---------|--------|---------|---------------|--------|---------|---------|--------|---------|
| Conformer                                              | 1             | 2      | 3       | 4       | 5      | 6       | 1             | 2      | 3       | 4       | 5      | 6       |
| Abundance                                              | 37.9          | 46.6   | 4.9     | 0.2     | 9.7    | 0.7     | 10.7          | 7.4    | 48.6    | 4.1     | 24.5   | 4.7     |
| Zn-N5. Å                                               | 2.158         | 2.155  | 2.135   | 2.151   | 2.156  | 2.137   | 2.198         | 2.191  | 2.129   | 2.150   | 2.139  | 2.142   |
| Averaged Zn-N5. Å*                                     | 2.155         |        |         |         |        |         | 2.145         |        |         |         |        |         |
| N1-Zn-N5                                               | 90.34         | 90.86  | 93.96   | 91.7    | 89.09  | 91.51   | 89.9          | 89.9   | 93.22   | 92.99   | 88.74  | 93.33   |
| N3-Zn-N5                                               | 108.51        | 106.27 | 113.78  | 113.34  | 105.25 | 109.69  | 105.02        | 105.02 | 114.88  | 115.06  | 102.18 | 114.85  |
| N2-Zn-N5-Cg1                                           | -28.48        | -28.19 | 5.19    | -19.95  | -20.88 | -10.57  | 25.1          | 25.1   | -19.81  | -16.78  | 49.5   | -12.88  |
| Porphyrin                                              |               |        |         |         |        |         |               |        |         |         |        |         |
| C1-C2-C3-C4                                            | 8.98          | 9.95   | -0.41   | 4.67    | 9.84   | 3.38    | 6.14          | 6.14   | 6.24    | 5.01    | 9.49   | 5.23    |
| C5-C6-C7-C8                                            | -8.05         | -9.42  | 1.97    | -3.11   | -9.41  | -3.5    | -5.57         | -5.57  | -5.16   | -3.68   | -9.71  | -5.55   |
| N1-Zn-N2                                               | 158.33        | 159.72 | 158.88  | 159.48  | 160.71 | 159.89  | 160.61        | 160.61 | 158.45  | 157.68  | 158.93 | 157.24  |
| N3-Zn-N4                                               | 161.98        | 160.36 | 163.02  | 161.54  | 159.96 | 163.16  | 164.66        | 164.66 | 160.84  | 160.09  | 159.73 | 160.56  |
| Aryl in host                                           |               |        |         |         |        |         |               |        |         |         |        |         |
| C7-C <sub>m1</sub> -C <sub>Ph1</sub> -C <sub>Ph2</sub> | 65.9          | 113.25 | 109.01  | -114.05 | 66.61  | -100.31 | 70.5          | 70.5   | 109.98  | 67.22   | 60.53  | 66.43   |
| C3-C <sub>m2</sub> -C <sub>Ph3</sub> -C <sub>Ph4</sub> | 119.01        | 118.71 | 120.89  | 123.42  | 115.82 | 119.02  | 117.2         | 117.2  | 124.78  | 124.67  | 73.35  | 122.55  |
| C5-C <sub>m3</sub> -C <sub>Ph5</sub> -C <sub>Ph6</sub> | 63.38         | 65.69  | 60.24   | 59.12   | 117.04 | 115.09  | 66.35         | 66.35  | 57.73   | 61.14   | 117.71 | 116.86  |
| C1-C <sub>m4</sub> -C <sub>Ph7</sub> -C <sub>Ph8</sub> | 116.04        | 65.79  | 115.42  | 70.57   | 64.56  | 112.83  | 112.41        | 112.41 | 115.99  | 67.84   | 65.94  | 115.13  |
| Guest conf.                                            |               |        |         |         |        |         |               |        |         |         |        |         |
| Cg3-Cg2-Ng1-H1                                         | -73.86        | -76.97 | 82.37   | 90.77   | -86.57 | 89.29   | -24.68        | -24.68 | -0.95   | -20.59  | -1.51  | -14.37  |
| H1-Ng1-Cg4-S                                           | 169.66        | 169.87 | -169.33 | -169.77 | 169.82 | -168.97 | -89.67        | -89.67 | 83.97   | 92.48   | -86.87 | 92.54   |
| S-Cg4-Ng2-H2                                           | 18.99         | 20.1   | -27.3   | 164.55  | 17.3   | 168.32  | 170.62        | 170.62 | -170.28 | -171.13 | 170.23 | -170.83 |
| H2-Ng2-C <sub>Ph9</sub> -C <sub>Ph10</sub>             | 24.87         | 26.11  | -16     | -10.88  | 24.35  | -5.8    | 16.75         | 16.75  | -23.51  | 166.55  | 14.95  | 167.41  |

\* Boltzmann-averaged distance



**Table S30.** Topological analysis (QTAIM) of the electron density of main conformers in complexes **1a·P6** and **1a·P3**.

weak dispersion –  $\rho(r) < 0.005$  a.u., positive Laplacian [10],

strong noncovalent interactions –  $0.005 < \rho(r) < 0.05$  a.u., positive Laplacian [10],

$\sigma/\pi$  interactions –  $0.007 < \rho(r) < 0.010$  a.u., positive Laplacian [11],

$\pi$ – $\pi$  stacking –  $\rho(r) < 0.0125$  a.u., positive Laplacian, the presence of a C...C bond path between the C atoms belonging to different rings [12],

covalent bond –  $\rho(r) > 0.100$  a.u., negative Laplacian [13].

| Atoms                                                                                                                                                                                                                | Electron<br>Delocalization<br>Index. | Electron<br>Density<br>( $\rho(r)$ ),<br>a.u. | Laplacian<br>of Rho |
|----------------------------------------------------------------------------------------------------------------------------------------------------------------------------------------------------------------------|--------------------------------------|-----------------------------------------------|---------------------|
| <b>Complex 1a·P6</b>                                                                                                                                                                                                 |                                      |                                               |                     |
| <b>BCP (bond critical point)</b>                                                                                                                                                                                     |                                      |                                               |                     |
| C <sub>69</sub> H <sub>58</sub>                                                                                                                                                                                      | 0.015                                | 0.008                                         | 0.029               |
| C <sub>61</sub> H <sub>33</sub>                                                                                                                                                                                      | 0.023                                | 0.010                                         | 0.031               |
| H <sub>50</sub> H <sub>65</sub>                                                                                                                                                                                      | 0.011                                | 0.005                                         | 0.021               |
| C <sub>77</sub> H <sub>33</sub>                                                                                                                                                                                      | 0.03                                 | 0.011                                         | 0.042               |
| C <sub>73</sub> H <sub>66</sub>                                                                                                                                                                                      | 0.89                                 | 0.009                                         | 0.029               |
| S <sub>55</sub> H <sub>70</sub>                                                                                                                                                                                      | 0.037                                | 0.007                                         | 0.019               |
| C <sub>75</sub> F <sub>124</sub>                                                                                                                                                                                     | 0.018                                | 0.005                                         | 0.021               |
| C <sub>75</sub> F <sub>125</sub>                                                                                                                                                                                     | 0.012                                | 0.004                                         | 0.016               |
| H <sub>48</sub> H <sub>100</sub>                                                                                                                                                                                     | 0.015                                | 0.006                                         | 0.021               |
| F <sub>116</sub> F <sub>125</sub>                                                                                                                                                                                    | 0.016                                | 0.005                                         | 0.027               |
| F <sub>126</sub> F <sub>130</sub>                                                                                                                                                                                    | 0.001                                | 0.000                                         | 0.005               |
| H <sub>50</sub> F <sub>128</sub>                                                                                                                                                                                     | 0.011                                | 0.003                                         | 0.016               |
| <b>Complex 1a·P3</b>                                                                                                                                                                                                 |                                      |                                               |                     |
| H <sub>14</sub> C <sub>118</sub>                                                                                                                                                                                     | 0.027                                | 0.011                                         | 0.045               |
| F <sub>75</sub> H <sub>14</sub>                                                                                                                                                                                      | 0.010                                | 0.003                                         | 0.018               |
| C <sub>63</sub> C <sub>112</sub>                                                                                                                                                                                     | 0.030                                | 0.008                                         | 0.022               |
| F <sub>73</sub> C <sub>114</sub>                                                                                                                                                                                     | 0.018                                | 0.004                                         | 0.017               |
| F <sub>75</sub> C <sub>116</sub>                                                                                                                                                                                     | 0.016                                | 0.004                                         | 0.015               |
| F <sub>72</sub> H <sub>113</sub>                                                                                                                                                                                     | 0.019                                | 0.006                                         | 0.029               |
| H <sub>111</sub> F <sub>72</sub>                                                                                                                                                                                     | 0.013                                | 0.005                                         | 0.024               |
| <b>Complex 1a·P6</b>                                                                                                                                                                                                 |                                      |                                               |                     |
| <b>RCP (ring critical point)</b>                                                                                                                                                                                     |                                      |                                               |                     |
| C <sub>15</sub> C <sub>17</sub> H <sub>33</sub> H <sub>77</sub> C <sub>68</sub> C <sub>26</sub>                                                                                                                      | 0.010                                | 0.048                                         |                     |
| H <sub>33</sub> C <sub>61</sub> C <sub>64</sub> C <sub>113</sub> F <sub>124</sub> C <sub>75</sub> C <sub>77</sub><br>F <sub>125</sub>                                                                                | 0.003                                | 0.011                                         |                     |
| C <sub>37</sub> C <sub>38</sub> H <sub>48</sub> H <sub>100</sub> C <sub>99</sub> F <sub>128</sub> H <sub>50</sub>                                                                                                    | 0.001                                | 0.006                                         |                     |
| C <sub>17</sub> C <sub>21</sub> C <sub>19</sub> C <sub>22</sub> C <sub>90</sub> C <sub>99</sub> F <sub>128</sub> C <sub>112</sub><br>C <sub>62</sub> C <sub>60</sub> C <sub>59</sub> C <sub>61</sub> H <sub>33</sub> | 0.001                                | 0.001                                         |                     |
| N <sub>4</sub> C <sub>15</sub> C <sub>26</sub> C <sub>68</sub> C <sub>69</sub> H <sub>58</sub> N <sub>57</sub> C <sub>54</sub><br>N <sub>53</sub>                                                                    | 0.003                                | 0.011                                         |                     |
| C <sub>36</sub> C <sub>37</sub> H <sub>50</sub> H <sub>65</sub> C <sub>60</sub> H <sub>56</sub> N <sub>53</sub>                                                                                                      | 0.005                                | 0.020                                         |                     |

|                                                                                                                                                                                                                                                                                                                                                                                                                                            |       |       |  |
|--------------------------------------------------------------------------------------------------------------------------------------------------------------------------------------------------------------------------------------------------------------------------------------------------------------------------------------------------------------------------------------------------------------------------------------------|-------|-------|--|
| N <sub>57</sub> H <sub>58</sub> C <sub>69</sub> C <sub>71</sub> C <sub>73</sub> H <sub>66</sub> C <sub>61</sub> C <sub>59</sub>                                                                                                                                                                                                                                                                                                            | 0.004 | 0.016 |  |
| C <sub>17</sub> C <sub>21</sub> H <sub>56</sub> C <sub>60</sub> C <sub>59</sub> C <sub>61</sub> H <sub>33</sub>                                                                                                                                                                                                                                                                                                                            | 0.006 | 0.017 |  |
| H <sub>33</sub> C <sub>61</sub> H <sub>66</sub> C <sub>73</sub> C <sub>75</sub> C <sub>77</sub>                                                                                                                                                                                                                                                                                                                                            | 0.004 | 0.012 |  |
| C <sub>73</sub> C <sub>74</sub> F <sub>116</sub> F <sub>125</sub> C <sub>75</sub>                                                                                                                                                                                                                                                                                                                                                          | 0.003 | 0.016 |  |
| C <sub>54</sub> S <sub>55</sub> H <sub>70</sub> C <sub>69</sub> H <sub>58</sub> N <sub>57</sub>                                                                                                                                                                                                                                                                                                                                            | 0.005 | 0.020 |  |
| C <sub>61</sub> C <sub>64</sub> C <sub>113</sub> F <sub>125</sub> C <sub>75</sub> C <sub>73</sub> H <sub>66</sub>                                                                                                                                                                                                                                                                                                                          | 0.004 | 0.015 |  |
| C <sub>75</sub> F <sub>124</sub> C <sub>113</sub> F <sub>125</sub>                                                                                                                                                                                                                                                                                                                                                                         | 0.004 | 0.016 |  |
| H <sub>50</sub> H <sub>65</sub> C <sub>60</sub> C <sub>62</sub> C <sub>112</sub> F <sub>128</sub>                                                                                                                                                                                                                                                                                                                                          | 0.003 | 0.013 |  |
| C <sub>95</sub> C <sub>96</sub> F <sub>130</sub> F <sub>126</sub> C <sub>112</sub> F <sub>128</sub> C <sub>99</sub><br>C <sub>97</sub>                                                                                                                                                                                                                                                                                                     | 0.000 | 0.004 |  |
| <b>CCP (cage critical point)</b>                                                                                                                                                                                                                                                                                                                                                                                                           |       |       |  |
| N <sub>4</sub> C <sub>17</sub> C <sub>19</sub> C <sub>20</sub> C <sub>21</sub> C <sub>22</sub> C <sub>23</sub> H <sub>33</sub><br>C <sub>36</sub> C <sub>37</sub> C <sub>38</sub> H <sub>48</sub> H <sub>50</sub> H <sub>52</sub> N <sub>53</sub> H <sub>56</sub><br>C <sub>59</sub> C <sub>60</sub> C <sub>61</sub> C <sub>62</sub> H <sub>65</sub> C <sub>90</sub> C <sub>99</sub> H <sub>100</sub><br>C <sub>112</sub> F <sub>128</sub> | 0.001 | 0.003 |  |
| N <sub>4</sub> C <sub>15</sub> C <sub>17</sub> C <sub>21</sub> C <sub>26</sub> H <sub>33</sub> N <sub>53</sub> C <sub>54</sub><br>H <sub>56</sub> N <sub>57</sub> H <sub>58</sub> C <sub>59</sub> C <sub>60</sub> C <sub>61</sub> H <sub>66</sub> C <sub>68</sub><br>C <sub>69</sub> C <sub>71</sub> C <sub>73</sub> C <sub>75</sub> C <sub>77</sub>                                                                                       | 0.003 | 0.010 |  |
| H <sub>33</sub> C <sub>61</sub> C <sub>64</sub> H <sub>66</sub> C <sub>73</sub> C <sub>75</sub> C <sub>77</sub> C <sub>113</sub><br>F <sub>124</sub> F <sub>125</sub>                                                                                                                                                                                                                                                                      | 0.003 | 0.010 |  |
| <b>Complex 1a-P3</b>                                                                                                                                                                                                                                                                                                                                                                                                                       |       |       |  |
| <b>RCP</b>                                                                                                                                                                                                                                                                                                                                                                                                                                 |       |       |  |
| C <sub>13</sub> H <sub>14</sub> C <sub>118</sub> C <sub>109</sub> C <sub>27</sub> C <sub>25</sub>                                                                                                                                                                                                                                                                                                                                          | 0.011 | 0.051 |  |
| C <sub>59</sub> C <sub>60</sub> C <sub>62</sub> C <sub>63</sub> C <sub>64</sub> C <sub>61</sub> C <sub>110</sub> H <sub>111</sub><br>C <sub>112</sub>                                                                                                                                                                                                                                                                                      | 0.004 | 0.011 |  |
| C <sub>13</sub> H <sub>14</sub> F <sub>75</sub> C <sub>68</sub> C <sub>62</sub> C <sub>60</sub> H <sub>65</sub>                                                                                                                                                                                                                                                                                                                            | 0.003 | 0.017 |  |
| C <sub>13</sub> C <sub>25</sub> C <sub>27</sub> C <sub>109</sub> C <sub>110</sub> C <sub>112</sub> C <sub>63</sub><br>C <sub>62</sub> C <sub>60</sub> H <sub>65</sub>                                                                                                                                                                                                                                                                      | 0.003 | 0.009 |  |
| C <sub>63</sub> C <sub>64</sub> C <sub>69</sub> F <sub>72</sub> H <sub>113</sub> C <sub>112</sub>                                                                                                                                                                                                                                                                                                                                          | 0.004 | 0.016 |  |
| C <sub>63</sub> C <sub>64</sub> C <sub>69</sub> F <sub>72</sub> H <sub>111</sub> C <sub>110</sub> C <sub>112</sub>                                                                                                                                                                                                                                                                                                                         | 0.004 | 0.019 |  |
| <b>CCP</b>                                                                                                                                                                                                                                                                                                                                                                                                                                 |       |       |  |
| C <sub>68</sub> F <sub>73</sub> C <sub>114</sub> C <sub>116</sub> F <sub>75</sub>                                                                                                                                                                                                                                                                                                                                                          | 0.003 | 0.012 |  |
| C <sub>62</sub> C <sub>63</sub> C <sub>112</sub> C <sub>114</sub> F <sub>73</sub> C <sub>68</sub>                                                                                                                                                                                                                                                                                                                                          | 0.003 | 0.012 |  |
| F <sub>72</sub> H <sub>111</sub> C <sub>110</sub> C <sub>112</sub> H <sub>113</sub>                                                                                                                                                                                                                                                                                                                                                        | 0.004 | 0.022 |  |
| H <sub>14</sub> F <sub>75</sub> C <sub>116</sub> C <sub>118</sub>                                                                                                                                                                                                                                                                                                                                                                          | 0.002 | 0.010 |  |

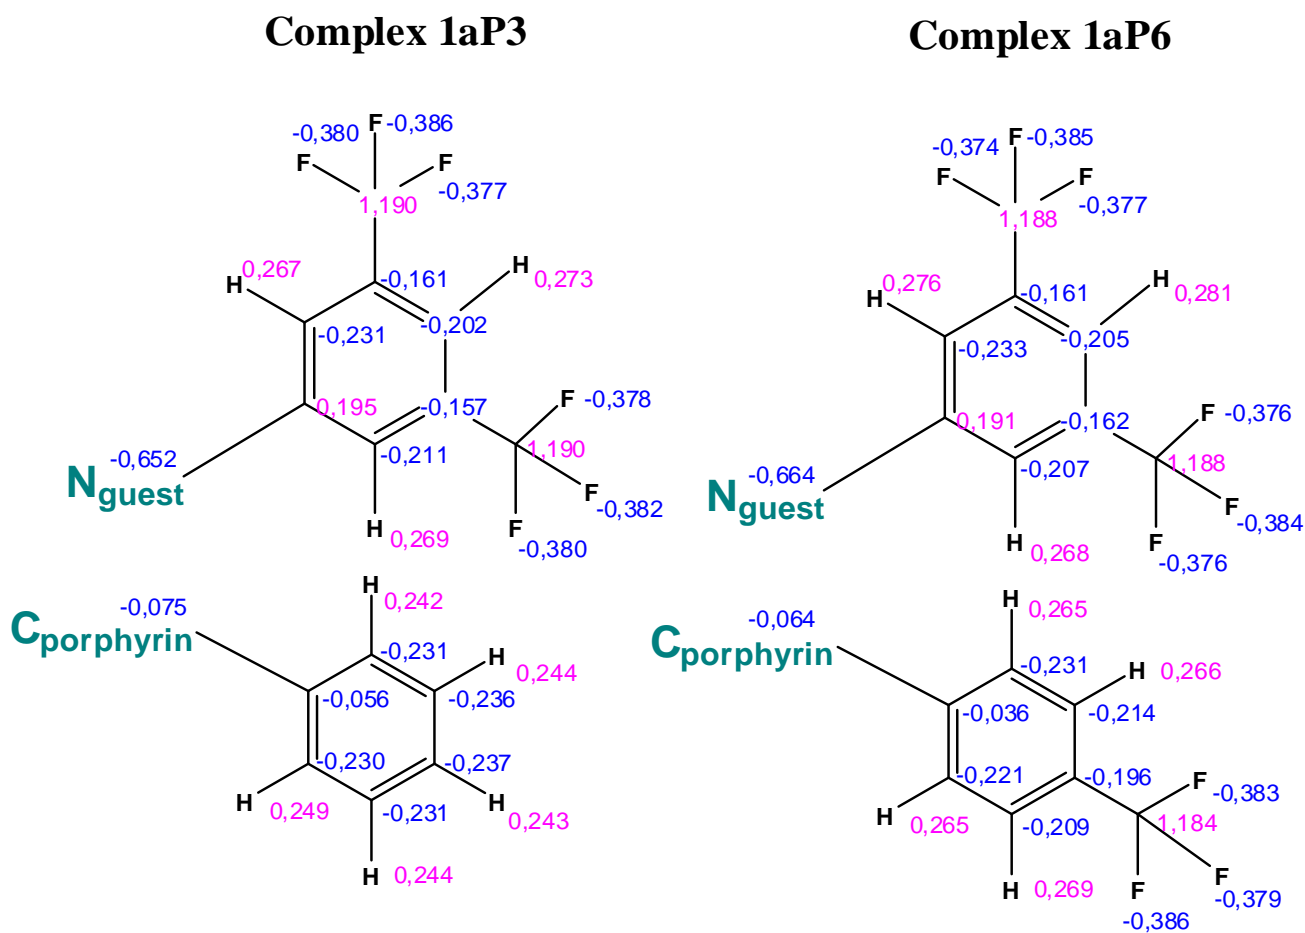

**Figure S91.** NBO partial atomic charges of main conformers in complexes **1a-P3** and **1a-P6**.

**Table S31.** NBO partial atomic charges of main conformers in complexes **1a-P6** and **1a-P3**.

| No | Atom | Natural Charge |  | No | Atom | Natural Charge |
|----|------|----------------|--|----|------|----------------|
| 1  | Zn   | 1.16739        |  | 1  | Zn   | 1.14926        |
| 2  | N    | -0.65638       |  | 2  | N    | -0.65663       |
| 3  | N    | -0.65835       |  | 3  | N    | -0.66114       |
| 4  | N    | -0.66374       |  | 4  | N    | -0.65117       |
| 5  | N    | -0.66657       |  | 5  | N    | -0.66347       |
| 6  | C    | -0.25865       |  | 6  | C    | -0.25195       |
| 7  | C    | -0.06327       |  | 7  | C    | -0.05896       |
| 8  | C    | -0.25874       |  | 8  | C    | -0.25673       |
| 9  | C    | 0.19927        |  | 9  | C    | 0.20022        |

|    |   |          |  |    |   |          |
|----|---|----------|--|----|---|----------|
| 10 | C | 0.19741  |  | 10 | C | 0.19899  |
| 11 | C | -0.25767 |  | 11 | C | -0.25329 |
| 12 | H | 0.26248  |  | 12 | H | 0.25396  |
| 13 | C | -0.25931 |  | 13 | C | -0.26361 |
| 14 | H | 0.26185  |  | 14 | H | 0.2549   |
| 15 | C | 0.19855  |  | 15 | C | 0.18744  |
| 16 | C | 0.19292  |  | 16 | C | 0.19234  |
| 17 | C | -0.26601 |  | 17 | C | -0.2548  |
| 18 | C | -0.25574 |  | 18 | C | -0.25741 |
| 19 | C | 0.18431  |  | 19 | C | 0.19294  |
| 20 | C | 0.19437  |  | 20 | C | 0.19213  |
| 21 | C | -0.26707 |  | 21 | C | -0.25857 |
| 22 | C | -0.0716  |  | 22 | C | -0.06764 |
| 23 | C | -0.25845 |  | 23 | C | -0.25451 |
| 24 | C | 0.20146  |  | 24 | C | 0.19649  |
| 25 | C | 0.19779  |  | 25 | C | 0.19876  |
| 26 | C | -0.06449 |  | 26 | C | -0.06537 |
| 27 | C | -0.0641  |  | 27 | C | -0.07494 |
| 28 | H | 0.26333  |  | 28 | H | 0.25441  |
| 29 | H | 0.26331  |  | 29 | H | 0.25518  |
| 30 | H | 0.26324  |  | 30 | H | 0.25528  |
| 31 | H | 0.26225  |  | 31 | H | 0.2537   |
| 32 | H | 0.26205  |  | 32 | H | 0.25494  |
| 33 | H | 0.25643  |  | 33 | H | 0.25419  |
| 34 | N | -0.96082 |  | 34 | N | -0.95574 |
| 35 | C | -0.03631 |  | 35 | C | -0.02581 |
| 36 | C | -0.03644 |  | 36 | C | -0.04206 |
| 37 | C | -0.45722 |  | 37 | C | -0.44842 |
| 38 | C | -0.45002 |  | 38 | C | -0.43936 |
| 39 | C | -0.45936 |  | 39 | C | -0.45345 |
| 40 | C | -0.44741 |  | 40 | C | -0.44018 |
| 41 | H | 0.42878  |  | 41 | H | 0.42016  |
| 42 | H | 0.42272  |  | 42 | H | 0.42228  |
| 43 | H | 0.23141  |  | 43 | H | 0.22582  |
| 44 | H | 0.24517  |  | 44 | H | 0.24114  |
| 45 | H | 0.24517  |  | 45 | H | 0.2254   |

|    |   |          |  |    |   |          |
|----|---|----------|--|----|---|----------|
| 46 | H | 0.24095  |  | 46 | H | 0.23928  |
| 47 | H | 0.22709  |  | 47 | H | 0.21925  |
| 48 | H | 0.22315  |  | 48 | H | 0.22337  |
| 49 | H | 0.24472  |  | 49 | H | 0.23908  |
| 50 | H | 0.24131  |  | 50 | H | 0.24204  |
| 51 | H | 0.2353   |  | 51 | H | 0.22609  |
| 52 | H | 0.24988  |  | 52 | H | 0.25523  |
| 53 | N | -0.66542 |  | 53 | N | -0.65699 |
| 54 | C | 0.37006  |  | 54 | C | 0.37518  |
| 55 | S | -0.32718 |  | 55 | S | -0.31285 |
| 56 | H | 0.44829  |  | 56 | H | 0.44364  |
| 57 | N | -0.66437 |  | 57 | N | -0.65233 |
| 58 | H | 0.45986  |  | 58 | H | 0.45572  |
| 59 | C | 0.19133  |  | 59 | C | 0.19473  |
| 60 | C | -0.23267 |  | 60 | C | -0.21086 |
| 61 | C | -0.20703 |  | 61 | C | -0.23141 |
| 62 | C | -0.16112 |  | 62 | C | -0.1566  |
| 63 | C | -0.20474 |  | 63 | C | -0.20219 |
| 64 | C | -0.16238 |  | 64 | C | -0.16128 |
| 65 | H | 0.2764   |  | 65 | H | 0.2688   |
| 66 | H | 0.268    |  | 66 | H | 0.26683  |
| 67 | H | 0.28068  |  | 67 | H | 0.27288  |
| 68 | C | -0.03633 |  | 68 | C | 1.19027  |
| 69 | C | -0.23101 |  | 69 | C | 1.18989  |
| 70 | H | 0.26519  |  | 70 | F | -0.38005 |
| 71 | C | -0.21439 |  | 71 | F | -0.37711 |
| 72 | H | 0.26584  |  | 72 | F | -0.38581 |
| 73 | C | -0.19571 |  | 73 | F | -0.37816 |
| 74 | C | 1.18382  |  | 74 | F | -0.37952 |
| 75 | C | -0.20945 |  | 75 | F | -0.38201 |
| 76 | H | 0.26868  |  | 76 | C | -0.05941 |
| 77 | C | -0.22127 |  | 77 | C | -0.22326 |
| 78 | H | 0.26524  |  | 78 | H | 0.24863  |
| 79 | C | -0.0414  |  | 79 | C | -0.2334  |
| 80 | C | -0.21811 |  | 80 | H | 0.24437  |
| 81 | H | 0.26167  |  | 81 | C | -0.23821 |

|     |   |          |  |     |   |          |
|-----|---|----------|--|-----|---|----------|
| 82  | C | -0.20728 |  | 82  | H | 0.24307  |
| 83  | H | 0.26352  |  | 83  | C | -0.23357 |
| 84  | C | -0.19122 |  | 84  | H | 0.24431  |
| 85  | C | 1.18308  |  | 85  | C | -0.22588 |
| 86  | C | -0.20917 |  | 86  | H | 0.24756  |
| 87  | H | 0.26543  |  | 87  | C | -0.05983 |
| 88  | C | -0.21715 |  | 88  | C | -0.22551 |
| 89  | H | 0.26258  |  | 89  | H | 0.24842  |
| 90  | C | -0.04211 |  | 90  | C | -0.2331  |
| 91  | C | -0.21794 |  | 91  | H | 0.2441   |
| 92  | H | 0.26256  |  | 92  | C | -0.24033 |
| 93  | C | -0.2096  |  | 93  | H | 0.24273  |
| 94  | H | 0.26565  |  | 94  | C | -0.23368 |
| 95  | C | -0.19144 |  | 95  | H | 0.24337  |
| 96  | C | 1.1833   |  | 96  | C | -0.22534 |
| 97  | C | -0.20265 |  | 97  | H | 0.24611  |
| 98  | H | 0.26295  |  | 98  | C | -0.05818 |
| 99  | C | -0.21385 |  | 99  | C | -0.22534 |
| 100 | H | 0.25434  |  | 100 | H | 0.24348  |
| 101 | C | -0.04026 |  | 101 | C | -0.23373 |
| 102 | C | -0.21594 |  | 102 | H | 0.24437  |
| 103 | H | 0.2573   |  | 103 | C | -0.23625 |
| 104 | C | -0.20706 |  | 104 | H | 0.24345  |
| 105 | H | 0.26336  |  | 105 | C | -0.23293 |
| 106 | C | -0.19092 |  | 106 | H | 0.24479  |
| 107 | C | 1.18313  |  | 107 | C | -0.22363 |
| 108 | C | -0.20854 |  | 108 | H | 0.24963  |
| 109 | H | 0.2657   |  | 109 | C | -0.05614 |
| 110 | C | -0.21796 |  | 110 | C | -0.23099 |
| 111 | H | 0.26289  |  | 111 | H | 0.2424   |
| 112 | C | 1.18844  |  | 112 | C | -0.23565 |
| 113 | C | 1.18808  |  | 113 | H | 0.24448  |
| 114 | F | -0.37853 |  | 114 | C | -0.23715 |
| 115 | F | -0.38288 |  | 115 | H | 0.24313  |
| 116 | F | -0.38568 |  | 116 | C | -0.2307  |
| 117 | F | -0.38195 |  | 117 | H | 0.2443   |

|     |   |          |  |     |   |          |
|-----|---|----------|--|-----|---|----------|
| 118 | F | -0.38399 |  | 118 | C | -0.22958 |
| 119 | F | -0.38345 |  | 119 | H | 0.24923  |
| 120 | F | -0.38172 |  |     |   |          |
| 121 | F | -0.38397 |  |     |   |          |
| 122 | F | -0.38366 |  |     |   |          |
| 123 | F | -0.37589 |  |     |   |          |
| 124 | F | -0.38441 |  |     |   |          |
| 125 | F | -0.37564 |  |     |   |          |
| 126 | F | -0.37435 |  |     |   |          |
| 127 | F | -0.37731 |  |     |   |          |
| 128 | F | -0.38524 |  |     |   |          |
| 129 | F | -0.38176 |  |     |   |          |
| 130 | F | -0.38369 |  |     |   |          |
| 131 | F | -0.38389 |  |     |   |          |

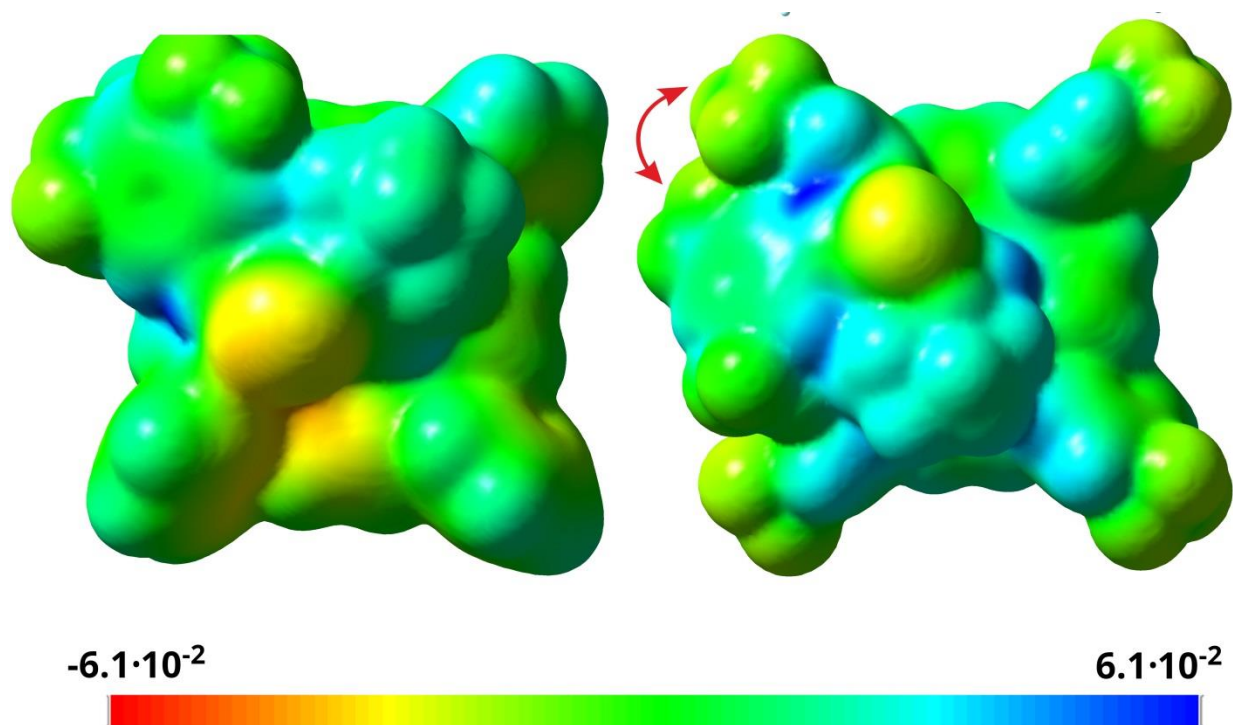

**Figure S92.** Molecular electrostatic surface potential for the dominant conformers of complexes **1a·P3** (left) and **1a·P6** (right) calculated based on the NBO partial charges, mapped over the electron density isosurface at 0.002 au.

**Table S32.** Perturbation theory energy analysis of the main conformers of complexes **1a·P6** and **1a·P3**

**Complex 1a·P6**

| Donor NBO (i)              | Acceptor NBO (j)            | E(2) kcal/mol |
|----------------------------|-----------------------------|---------------|
| 91. BD ( 2) C 68 - C 77    | /***. BD*( 1) C 17 - H 33   | 0.51          |
| 88. BD ( 1) C 64 - C 113   | /616. RY*( 1) H 33          | 0.3           |
| 323. LP ( 1) F 124         | /616. RY*( 1) H 33          | 0.09          |
| 323. LP ( 1) F 124         | /***. BD*( 1) C 17 - H 33   | 0.17          |
| 324. LP ( 2) F 124         | /616. RY*( 1) H 33          | 0.08          |
| 324. LP ( 2) F 124         | /***. BD*( 1) C 17 - H 33   | 0.36          |
|                            |                             |               |
| 92. BD ( 1) C 69 - H 70    | /771. RY*( 1) H 58          | 0.07          |
| 92. BD ( 1) C 69 - H 70    | /***. BD*( 1) N 57 - H 58   | 0.12          |
| 93. BD ( 1) C 69 - C 71    | /771. RY*( 1) H 58          | 0.14          |
| 94. BD ( 2) C 69 - C 71    | /771. RY*( 1) H 58          | 0.17          |
| 94. BD ( 2) C 69 - C 71    | /***. BD*( 1) N 57 - H 58   | 1.02          |
| 73. BD ( 1) N 57 - H 58    | /852. RY*( 3) C 69          | 0.07          |
| 73. BD ( 1) N 57 - H 58    | /***. BD*( 2) C 69 - C 71   | 0.14          |
|                            |                             |               |
| 71. BD ( 1) C 54 - S 55    | /859. RY*( 1) H 70          | 0.41          |
| 289. LP ( 1) S 55          | /***. BD*( 1) C 69 - H 70   | 0.24          |
| 290. LP ( 2) S 55          | /***. BD*( 1) C 69 - H 70   | 0.32          |
| 291. LP ( 3) S 55          | /***. BD*( 1) C 69 - H 70   | 1.35          |
|                            |                             |               |
| 161. BD ( 1) C 113 - F 124 | /896. RY*( 3) C 75          | 0.06          |
| 323. LP ( 1) F 124         | /616. RY*( 1) H 33          | 0.09          |
| 323. LP ( 1) F 124         | /***. BD*( 1) C 17 - H 33   | 0.17          |
| 324. LP ( 2) F 124         | /616. RY*( 1) H 33          | 0.08          |
| 324. LP ( 2) F 124         | /***. BD*( 1) C 17 - H 33   | 0.36          |
| 325. LP ( 3) F 124         | /896. RY*( 3) C 75          | 0.08          |
| 325. LP ( 3) F 124         | /***. BD*( 2) C 73 - C 75   | 0.21          |
|                            |                             |               |
| 326. LP ( 1) F 125         | /***. BD*( 1) C 74 - F 115  | 0.06          |
| 326. LP ( 1) F 125         | /***. BD*( 1) C 74 - F 116  | 0.05          |
| 328. LP ( 3) F 125         | /896. RY*( 3) C 75          | 0.06          |
|                            |                             |               |
| 138. BD ( 2) C 97 - C 99   | /***. BD*( 1) C 112 - F 128 | 0.2           |
| 335. LP ( 1) F 128         | /***. RY*( 3) C 97          | 0.07          |
| 335. LP ( 1) F 128         | /***. RY*( 3) C 99          | 0.11          |
| 336. LP ( 2) F 128         | /***. BD*( 2) C 97 - C 99   | 0.14          |
|                            |                             |               |
| 300. LP ( 2) F 116         | /833. RY*( 1) H 66          | 0.06          |
| 300. LP ( 2) F 116         | /***. BD*( 1) C 61 - H 66   | 0.08          |
| <b>Total bonds</b>         |                             | <b>7.58</b>   |
| 89. BD ( 1) C 68 - C 69    | /833. RY*( 1) H 66          | 0.05          |
| 90. BD ( 1) C 68 - C 77    | /833. RY*( 1) H 66          | 0.06          |
| 93. BD ( 1) C 69 - C 71    | /833. RY*( 1) H 66          | 0.25          |



|                          |                           |             |
|--------------------------|---------------------------|-------------|
| 94. BD ( 2) C 69 - C 71  | /833. RY*( 1) H 66        | 0.12        |
| 94. BD ( 2) C 69 - C 71  | /***. BD*( 1) C 61 - H 66 | 0.31        |
| 96. BD ( 1) C 71 - C 73  | /833. RY*( 1) H 66        | 0.6         |
| 97. BD ( 1) C 73 - C 74  | /833. RY*( 1) H 66        | 0.3         |
| 98. BD ( 1) C 73 - C 75  | /833. RY*( 1) H 66        | 0.42        |
| 99. BD ( 2) C 73 - C 75  | /833. RY*( 1) H 66        | 0.41        |
| 99. BD ( 2) C 73 - C 75  | /***. BD*( 1) C 61 - H 66 | 0.88        |
| 104. BD ( 1) C 75 - C 77 | /833. RY*( 1) H 66        | 0.19        |
| <b>Total rings</b>       |                           | <b>1.90</b> |
| 164. CR ( 2) Zn 1        | /***. BD*( 1) N 34 - C 35 | 0,07        |
| 165. CR ( 3) Zn 1        | /***. BD*( 1) N 34 - C 35 | 0,43        |
| 165. CR ( 3) Zn 1        | /***. BD*( 1) N 34 - H 41 | 0,2         |
| 165. CR ( 3) Zn 1        | /***. BD*( 1) N 34 - H 42 | 0,11        |
| 171. CR ( 9) Zn 1        | /***. BD*( 1) N 34 - C 35 | 0,19        |
| 171. CR ( 9) Zn 1        | /***. BD*( 1) N 34 - H 41 | 0,05        |
| 265. LP ( 1) Zn 1        | /620. RY*( 1) N 34        | 0,06        |
| 266. LP ( 2) Zn 1        | /***. BD*( 1) N 34 - H 41 | 0,05        |
| 266. LP ( 2) Zn 1        | /***. BD*( 1) N 34 - H 42 | 0,15        |
| 269. LP ( 5) Zn 1        | /***. BD*( 1) N 34 - C 35 | 0,21        |
| 269. LP ( 5) Zn 1        | /***. BD*( 1) N 34 - H 41 | 0,09        |
| 270. LP*( 6) Zn 1        | /620. RY*( 1) N 34        | 0,5         |
| 270. LP*( 6) Zn 1        | /621. RY*( 2) N 34        | 0,05        |
| 270. LP*( 6) Zn 1        | /622. RY*( 3) N 34        | 0,05        |
| 270. LP*( 6) Zn 1        | /627. RY*( 8) N 34        | 0,07        |
| 270. LP*( 6) Zn 1        | /***. BD*( 1) N 34 - C 35 | 0,7         |
| 270. LP*( 6) Zn 1        | /***. BD*( 1) N 34 - H 41 | 0,88        |
| 270. LP*( 6) Zn 1        | /***. BD*( 1) N 34 - H 42 | 0,65        |
| 271. LP*( 7) Zn 1        | /621. RY*( 2) N 34        | 0,06        |
| 271. LP*( 7) Zn 1        | /622. RY*( 3) N 34        | 0,17        |
| 271. LP*( 7) Zn 1        | /***. BD*( 1) N 34 - C 35 | 0,66        |
| 272. LP*( 8) Zn 1        | /621. RY*( 2) N 34        | 0,2         |
| 272. LP*( 8) Zn 1        | /622. RY*( 3) N 34        | 0,06        |
| 272. LP*( 8) Zn 1        | /***. BD*( 1) N 34 - C 35 | 0,25        |
| 272. LP*( 8) Zn 1        | /***. BD*( 1) N 34 - H 42 | 0,1         |
| 273. LP*( 9) Zn 1        | /623. RY*( 4) N 34        | 0,09        |
| 273. LP*( 9) Zn 1        | /***. BD*( 1) N 34 - C 35 | 0,57        |
| 273. LP*( 9) Zn 1        | /***. BD*( 1) N 34 - H 41 | 1,01        |
| 273. LP*( 9) Zn 1        | /***. BD*( 1) N 34 - H 42 | 0,86        |
| 49. BD ( 1) N 34 - C 35  | /270. LP*( 6) Zn 1        | 1,11        |
| 49. BD ( 1) N 34 - C 35  | /271. LP*( 7) Zn 1        | 0,08        |
| 49. BD ( 1) N 34 - C 35  | /273. LP*( 9) Zn 1        | 6,24        |
| 49. BD ( 1) N 34 - C 35  | /347. RY*( 1) Zn 1        | 0,13        |
| 49. BD ( 1) N 34 - C 35  | /353. RY*( 7) Zn 1        | 0,13        |
| 49. BD ( 1) N 34 - C 35  | /354. RY*( 8) Zn 1        | 0,28        |
| 49. BD ( 1) N 34 - C 35  | /356. RY*( 10) Zn 1       | 0,19        |
| 50. BD ( 1) N 34 - H 41  | /270. LP*( 6) Zn 1        | 2,61        |
| 50. BD ( 1) N 34 - H 41  | /272. LP*( 8) Zn 1        | 0,19        |
| 50. BD ( 1) N 34 - H 41  | /273. LP*( 9) Zn 1        | 8,49        |

|                                   |                    |               |
|-----------------------------------|--------------------|---------------|
| 50. BD ( 1) N 34 - H 41           | /347. RY*( 1)Zn 1  | 0,41          |
| 50. BD ( 1) N 34 - H 41           | /353. RY*( 7)Zn 1  | 0,43          |
| 50. BD ( 1) N 34 - H 41           | /355. RY*( 9)Zn 1  | 0,06          |
| 50. BD ( 1) N 34 - H 41           | /357. RY*( 11)Zn 1 | 0,06          |
| 51. BD ( 1) N 34 - H 42           | /270. LP*( 6)Zn 1  | 2,64          |
| 51. BD ( 1) N 34 - H 42           | /271. LP*( 7)Zn 1  | 0,13          |
| 51. BD ( 1) N 34 - H 42           | /272. LP*( 8)Zn 1  | 0,52          |
| 51. BD ( 1) N 34 - H 42           | /273. LP*( 9)Zn 1  | 8,6           |
| 51. BD ( 1) N 34 - H 42           | /347. RY*( 1)Zn 1  | 0,37          |
| 51. BD ( 1) N 34 - H 42           | /353. RY*( 7)Zn 1  | 0,36          |
| 51. BD ( 1) N 34 - H 42           | /356. RY*( 10)Zn 1 | 0,08          |
| 196. CR ( 1) N 34                 | /270. LP*( 6)Zn 1  | 1,38          |
| 196. CR ( 1) N 34                 | /271. LP*( 7)Zn 1  | 0,1           |
| 196. CR ( 1) N 34                 | /273. LP*( 9)Zn 1  | 4,96          |
| 196. CR ( 1) N 34                 | /347. RY*( 1)Zn 1  | 0,1           |
| 196. CR ( 1) N 34                 | /353. RY*( 7)Zn 1  | 0,08          |
| 286. LP ( 1) N 34                 | /270. LP*( 6)Zn 1  | 45,61         |
| 286. LP ( 1) N 34                 | /271. LP*( 7)Zn 1  | 1,44          |
| 286. LP ( 1) N 34                 | /272. LP*( 8)Zn 1  | 0,15          |
| 286. LP ( 1) N 34                 | /273. LP*( 9)Zn 1  | 41,32         |
| 286. LP ( 1) N 34                 | /347. RY*( 1)Zn 1  | 0,12          |
| 286. LP ( 1) N 34                 | /352. RY*( 6)Zn 1  | 1,26          |
| 286. LP ( 1) N 34                 | /353. RY*( 7)Zn 1  | 0,31          |
| 286. LP ( 1) N 34                 | /356. RY*( 10)Zn 1 | 0,3           |
| 286. LP ( 1) N 34                 | /357. RY*( 11)Zn 1 | 0,12          |
| 286. LP ( 1) N 34                 | /359. RY*( 13)Zn 1 | 0,08          |
| 286. LP ( 1) N 34                 | /364. RY*( 18)Zn 1 | 0,1           |
| <b>Total Zn-N<sub>quest</sub></b> |                    | <b>139,08</b> |

### Complex 1a·P3

| Donor NBO (i)     | Acceptor NBO (j)            | E(2) kcal/mol |
|-------------------|-----------------------------|---------------|
| 271. LP ( 1) F 72 | /***. RY*( 1) H 113         | 0.06          |
| 271. LP ( 1) F 72 | /***. BD*( 1) C 110 - H 111 | 0.11          |
| 271. LP ( 1) F 72 | /***. BD*( 1) C 112 - H 113 | 0.17          |
| 272. LP ( 2) F 72 | /***. RY*( 2) C 110         | 0.08          |
| 272. LP ( 2) F 72 | /***. BD*( 1) C 109 - C 110 | 0.07          |
| 272. LP ( 2) F 72 | /***. BD*( 1) C 110 - H 111 | 0.17          |
| 272. LP ( 2) F 72 | /***. BD*( 1) C 112 - H 113 | 0.1           |
| 272. LP ( 2) F 72 | /***. BD*( 1) C 112 - C 114 | 0.07          |
| 273. LP ( 3) F 72 | /***. RY*( 1) H 113         | 0.05          |
| 273. LP ( 3) F 72 | /***. BD*( 1) C 112 - H 113 | 0.2           |
|                   |                             |               |
| 276. LP ( 3) F 73 | /***. RY*( 3) C 114         | 0.07          |
| 276. LP ( 3) F 73 | /***. BD*( 2) C 112 - C 114 | 0.13          |
|                   |                             |               |
| 280. LP ( 1) F 75 | /411. RY*( 1) H 14          | 0.1           |
| 280. LP ( 1) F 75 | /***. BD*( 1) C 13 - H 14   | 0.2           |

|                            |                             |             |
|----------------------------|-----------------------------|-------------|
| 281. LP ( 2) F 75          | /***. BD*( 1) C 13 - H 14   | 0.28        |
| 282. LP ( 3) F 75          | /***. RY*( 3) C 116         | 0.07        |
| 282. LP ( 3) F 75          | /***. BD*( 2) C 116 - C 118 | 0.07        |
|                            |                             |             |
| 26. BD ( 1) C 13 - H 14    | /***. BD*( 2) C 116 - C 118 | 0.6         |
| 27. BD ( 1) C 13 - C 25    | /***. BD*( 1) C 13 - H 14   | 1.31        |
| 26. BD ( 1) C 13 - H 14    | /720. RY*( 1) C 60          | 0.13        |
| 26. BD ( 1) C 13 - H 14    | /722. RY*( 3) C 60          | 0.29        |
| 26. BD ( 1) C 13 - H 14    | /765. RY*( 1) H 65          | 0.18        |
| 26. BD ( 1) C 13 - H 14    | /***. BD*( 2) C 60 - C 62   | 0.28        |
| 26. BD ( 1) C 13 - H 14    | /***. BD*( 1) C 60 - H 65   | 0.13        |
| 78. BD ( 1) C 60 - C 62    | /411. RY*( 1) H 14          | 0.05        |
| 79. BD ( 2) C 60 - C 62    | /411. RY*( 1) H 14          | 0.09        |
| 79. BD ( 2) C 60 - C 62    | /***. BD*( 1) C 13 - H 14   | 0.09        |
| 80. BD ( 1) C 60 - H 65    | /411. RY*( 1) H 14          | 0.23        |
| 80. BD ( 1) C 60 - H 65    | /***. BD*( 1) C 13 - H 14   | 0.09        |
| 280. LP ( 1) F 75          | /411. RY*( 1) H 14          | 0.1         |
| 280. LP ( 1) F 75          | /***. BD*( 1) C 13 - H 14   | 0.2         |
| 281. LP ( 2) F 75          | /***. BD*( 1) C 13 - H 14   | 0.28        |
| <b>Total bonds</b>         |                             | <b>2.90</b> |
| 140. BD ( 1) C 110 - H 111 | /***. BD*( 2) C 59 - C 61   | 0.06        |
| 75. BD ( 1) C 59 - C 60    | /***. RY*( 3) C 109         | 0.09        |
| 76. BD ( 1) C 59 - C 61    | /***. RY*( 1) C 110         | 0.08        |
| 76. BD ( 1) C 59 - C 61    | /***. RY*( 3) C 110         | 0.08        |
| 77. BD ( 2) C 59 - C 61    | /***. BD*( 2) C 109 - C 110 | 0.11        |
| 77. BD ( 2) C 59 - C 61    | /***. BD*( 1) C 110 - H 111 | 0.07        |
| 140. BD ( 1) C 110 - H 111 | /731. RY*( 3) C 61          | 0.07        |
| 140. BD ( 1) C 110 - H 111 | /***. BD*( 2) C 59 - C 61   | 0.06        |
| 76. BD ( 1) C 59 - C 61    | /***. RY*( 1) C 110         | 0.08        |
| 81. BD ( 1) C 61 - C 64    | /***. RY*( 1) C 110         | 0.17        |
| 81. BD ( 1) C 61 - C 64    | /***. RY*( 3) C 110         | 0.12        |
| 81. BD ( 1) C 61 - C 64    | /***. RY*( 1) H 111         | 0.11        |
| 137. BD ( 1) C 109 - C 110 | /722. RY*( 3) C 60          | 0.06        |
| 137. BD ( 1) C 109 - C 110 | /***. BD*( 2) C 60 - C 62   | 0.14        |
| 78. BD ( 1) C 60 - C 62    | /***. RY*( 3) C 110         | 0.06        |
| 141. BD ( 1) C 110 - C 112 | /740. RY*( 3) C 62          | 0.11        |
| 143. BD ( 1) C 112 - C 114 | /740. RY*( 3) C 62          | 0.06        |
| 144. BD ( 2) C 112 - C 114 | /***. BD*( 2) C 60 - C 62   | 0.14        |
| 83. BD ( 1) C 62 - C 63    | /***. RY*( 2) C 110         | 0.06        |
| 83. BD ( 1) C 62 - C 63    | /***. RY*( 3) C 110         | 0.06        |
| 83. BD ( 1) C 62 - C 63    | /***. RY*( 3) C 112         | 0.29        |
| 84. BD ( 1) C 62 - C 68    | /***. RY*( 3) C 114         | 0.09        |
| 140. BD ( 1) C 110 - H 111 | /***. BD*( 2) C 63 - C 64   | 0.07        |
| 141. BD ( 1) C 110 - C 112 | /749. RY*( 3) C 63          | 0.2         |
| 141. BD ( 1) C 110 - C 112 | /751. RY*( 5) C 63          | 0.06        |
| 142. BD ( 1) C 112 - H 113 | /747. RY*( 1) C 63          | 0.05        |
| 142. BD ( 1) C 112 - H 113 | /749. RY*( 3) C 63          | 0.17        |
| 142. BD ( 1) C 112 - H 113 | /***. BD*( 2) C 63 - C 64   | 0.09        |

|                            |                             |             |
|----------------------------|-----------------------------|-------------|
| 144. BD ( 2) C 112 - C 114 | /749. RY*( 3) C 63          | 0.1         |
| 144. BD ( 2) C 112 - C 114 | /***. BD*( 2) C 63 - C 64   | 0.69        |
| 83. BD ( 1) C 62 - C 63    | /***. RY*( 2) C 110         | 0.06        |
| 83. BD ( 1) C 62 - C 63    | /***. RY*( 3) C 110         | 0.06        |
| 83. BD ( 1) C 62 - C 63    | /***. RY*( 3) C 112         | 0.29        |
| 85. BD ( 1) C 63 - C 64    | /***. RY*( 2) C 110         | 0.12        |
| 85. BD ( 1) C 63 - C 64    | /***. RY*( 3) C 110         | 0.09        |
| 85. BD ( 1) C 63 - C 64    | /***. RY*( 2) C 112         | 0.07        |
| 85. BD ( 1) C 63 - C 64    | /***. RY*( 3) C 112         | 0.12        |
| 86. BD ( 2) C 63 - C 64    | /***. RY*( 2) C 110         | 0.08        |
| 86. BD ( 2) C 63 - C 64    | /***. RY*( 3) C 110         | 0.08        |
| 86. BD ( 2) C 63 - C 64    | /***. RY*( 3) C 112         | 0.2         |
| 86. BD ( 2) C 63 - C 64    | /***. BD*( 2) C 109 - C 110 | 0.31        |
| 86. BD ( 2) C 63 - C 64    | ***. BD*( 2) C 112 - C 114  | 0.66        |
| 87. BD ( 1) C 63 - H 67    | /***. RY*( 1) C 112         | 0.06        |
| 87. BD ( 1) C 63 - H 67    | /***. RY*( 3) C 112         | 0.18        |
| 87. BD ( 1) C 63 - H 67    | /***. BD*( 2) C 112 - C 114 | 0.06        |
| 140. BD ( 1) C 110 - H 111 | /758. RY*( 3) C 64          | 0.15        |
| 140. BD ( 1) C 110 - H 111 | /***. BD*( 2) C 63 - C 64   | 0.07        |
| 141. BD ( 1) C 110 - C 112 | /757. RY*( 2) C 64          | 0.07        |
| 141. BD ( 1) C 110 - C 112 | /758. RY*( 3) C 64          | 0.12        |
| 142. BD ( 1) C 112 - H 113 | /***. BD*( 2) C 63 - C 64   | 0.09        |
| 144. BD ( 2) C 112 - C 114 | /***. BD*( 2) C 63 - C 64   | 0.69        |
| 81. BD ( 1) C 61 - C 64    | /***. RY*( 1) C 110         | 0.17        |
| 81. BD ( 1) C 61 - C 64    | /***. RY*( 3) C 110         | 0.12        |
| 81. BD ( 1) C 61 - C 64    | /***. RY*( 1) H 111         | 0.11        |
| 88. BD ( 1) C 64 - C 69    | /***. RY*( 2) C 110         | 0.06        |
| 88. BD ( 1) C 64 - C 69    | /***. RY*( 1) H 111         | 0.09        |
| <b>Total rings</b>         |                             | <b>7.78</b> |
| 152. CR ( 2)Zn 1           | /***. BD*( 1) N 34 - C 35   | 0,06        |
| 152. CR ( 2)Zn 1           | /***. BD*( 1) N 34 - H 42   | 0,06        |
| 153. CR ( 3)Zn 1           | /***. BD*( 1) N 34 - C 35   | 0,36        |
| 153. CR ( 3)Zn 1           | /***. BD*( 1) N 34 - H 41   | 0,09        |
| 153. CR ( 3)Zn 1           | /***. BD*( 1) N 34 - H 42   | 0,31        |
| 159. CR ( 9)Zn 1           | /***. BD*( 1) N 34 - C 35   | 0,15        |
| 159. CR ( 9)Zn 1           | /***. BD*( 1) N 34 - H 42   | 0,08        |
| 237. LP ( 1)Zn 1           | /556. RY*( 1) N 34          | 0,07        |
| 238. LP ( 2)Zn 1           | /***. BD*( 1) N 34 - H 42   | 0,06        |
| 239. LP ( 3)Zn 1           | /***. BD*( 1) N 34 - H 41   | 0,11        |
| 241. LP ( 5)Zn 1           | /***. BD*( 1) N 34 - C 35   | 0,08        |
| 241. LP ( 5)Zn 1           | /***. BD*( 1) N 34 - H 42   | 0,12        |
| 242. LP*( 6)Zn 1           | /556. RY*( 1) N 34          | 0,7         |
| 242. LP*( 6)Zn 1           | /561. RY*( 6) N 34          | 0,07        |
| 242. LP*( 6)Zn 1           | /***. BD*( 1) N 34 - C 35   | 0,67        |
| 242. LP*( 6)Zn 1           | /***. BD*( 1) N 34 - H 41   | 0,45        |
| 242. LP*( 6)Zn 1           | /***. BD*( 1) N 34 - H 42   | 0,73        |
| 243. LP*( 7)Zn 1           | /557. RY*( 2) N 34          | 0,2         |
| 243. LP*( 7)Zn 1           | /558. RY*( 3) N 34          | 0,09        |

|                         |                           |       |
|-------------------------|---------------------------|-------|
| 243. LP*( 7)Zn 1        | /***. BD*( 1) N 34 - C 35 | 0,37  |
| 243. LP*( 7)Zn 1        | /***. BD*( 1) N 34 - H 41 | 0,31  |
| 243. LP*( 7)Zn 1        | /***. BD*( 1) N 34 - H 42 | 0,19  |
| 244. LP*( 8)Zn 1        | /557. RY*( 2) N 34        | 0,09  |
| 244. LP*( 8)Zn 1        | /558. RY*( 3) N 34        | 0,19  |
| 244. LP*( 8)Zn 1        | /***. BD*( 1) N 34 - C 35 | 0,59  |
| 245. LP*( 9)Zn 1        | /557. RY*( 2) N 34        | 0,08  |
| 245. LP*( 9)Zn 1        | /564. RY*( 9) N 34        | 0,05  |
| 245. LP*( 9)Zn 1        | /***. BD*( 1) N 34 - C 35 | 0,35  |
| 245. LP*( 9)Zn 1        | /***. BD*( 1) N 34 - H 41 | 0,61  |
| 245. LP*( 9)Zn 1        | /***. BD*( 1) N 34 - H 42 | 0,93  |
| 49. BD ( 1) N 34 - C 35 | /242. LP*( 6)Zn 1         | 1,33  |
| 49. BD ( 1) N 34 - C 35 | /244. LP*( 8)Zn 1         | 0,11  |
| 49. BD ( 1) N 34 - C 35 | /245. LP*( 9)Zn 1         | 7,32  |
| 49. BD ( 1) N 34 - C 35 | /286. RY*( 4)Zn 1         | 0,07  |
| 49. BD ( 1) N 34 - C 35 | /289. RY*( 7)Zn 1         | 0,09  |
| 49. BD ( 1) N 34 - C 35 | /291. RY*( 9)Zn 1         | 0,09  |
| 49. BD ( 1) N 34 - C 35 | /292. RY*( 10)Zn 1        | 0,21  |
| 49. BD ( 1) N 34 - C 35 | /293. RY*( 11)Zn 1        | 0,07  |
| 50. BD ( 1) N 34 - H 41 | /242. LP*( 6)Zn 1         | 2,9   |
| 50. BD ( 1) N 34 - H 41 | /243. LP*( 7)Zn 1         | 0,92  |
| 50. BD ( 1) N 34 - H 41 | /245. LP*( 9)Zn 1         | 9,81  |
| 50. BD ( 1) N 34 - H 41 | /283. RY*( 1)Zn 1         | 0,11  |
| 50. BD ( 1) N 34 - H 41 | /284. RY*( 2)Zn 1         | 0,21  |
| 50. BD ( 1) N 34 - H 41 | /289. RY*( 7)Zn 1         | 0,39  |
| 50. BD ( 1) N 34 - H 41 | /292. RY*( 10)Zn 1        | 0,07  |
| 50. BD ( 1) N 34 - H 41 | /294. RY*( 12)Zn 1        | 0,06  |
| 50. BD ( 1) N 34 - H 41 | /297. RY*( 15)Zn 1        | 0,09  |
| 51. BD ( 1) N 34 - H 42 | /242. LP*( 6)Zn 1         | 1,87  |
| 51. BD ( 1) N 34 - H 42 | /244. LP*( 8)Zn 1         | 0,26  |
| 51. BD ( 1) N 34 - H 42 | /245. LP*( 9)Zn 1         | 8,09  |
| 51. BD ( 1) N 34 - H 42 | /283. RY*( 1)Zn 1         | 0,12  |
| 51. BD ( 1) N 34 - H 42 | /284. RY*( 2)Zn 1         | 0,15  |
| 51. BD ( 1) N 34 - H 42 | /289. RY*( 7)Zn 1         | 0,34  |
| 51. BD ( 1) N 34 - H 42 | /290. RY*( 8)Zn 1         | 0,2   |
| 51. BD ( 1) N 34 - H 42 | /292. RY*( 10)Zn 1        | 0,16  |
| 184. CR ( 1) N 34       | /242. LP*( 6)Zn 1         | 1,26  |
| 184. CR ( 1) N 34       | /245. LP*( 9)Zn 1         | 5,45  |
| 184. CR ( 1) N 34       | /284. RY*( 2)Zn 1         | 0,06  |
| 184. CR ( 1) N 34       | /287. RY*( 5)Zn 1         | 0,07  |
| 184. CR ( 1) N 34       | /289. RY*( 7)Zn 1         | 0,08  |
| 258. LP ( 1) N 34       | /242. LP*( 6)Zn 1         | 44,54 |
| 258. LP ( 1) N 34       | /244. LP*( 8)Zn 1         | 0,45  |
| 258. LP ( 1) N 34       | /245. LP*( 9)Zn 1         | 46,26 |
| 258. LP ( 1) N 34       | /287. RY*( 5)Zn 1         | 0,79  |
| 258. LP ( 1) N 34       | /288. RY*( 6)Zn 1         | 0,18  |
| 258. LP ( 1) N 34       | /289. RY*( 7)Zn 1         | 0,22  |
| 258. LP ( 1) N 34       | /292. RY*( 10)Zn 1        | 0,66  |

|                                   |                    |               |
|-----------------------------------|--------------------|---------------|
| 258. LP ( 1) N 34                 | /293. RY*( 11)Zn 1 | 0,05          |
| 258. LP ( 1) N 34                 | /296. RY*( 14)Zn 1 | 0,1           |
| 258. LP ( 1) N 34                 | /297. RY*( 15)Zn 1 | 0,15          |
| 258. LP ( 1) N 34                 | /300. RY*( 18)Zn 1 | 0,06          |
| 49. BD ( 1) N 34 - C 35           | /292. RY*( 10)Zn 1 | 0,21          |
| 49. BD ( 1) N 34 - C 35           | /293. RY*( 11)Zn 1 | 0,07          |
| 50. BD ( 1) N 34 - H 41           | /242. LP*( 6)Zn 1  | 2,9           |
| 50. BD ( 1) N 34 - H 41           | /243. LP*( 7)Zn 1  | 0,92          |
| 50. BD ( 1) N 34 - H 41           | /245. LP*( 9)Zn 1  | 9,81          |
| 50. BD ( 1) N 34 - H 41           | /283. RY*( 1)Zn 1  | 0,11          |
| 50. BD ( 1) N 34 - H 41           | /284. RY*( 2)Zn 1  | 0,21          |
| 50. BD ( 1) N 34 - H 41           | /289. RY*( 7)Zn 1  | 0,39          |
| 50. BD ( 1) N 34 - H 41           | /292. RY*( 10)Zn 1 | 0,07          |
| 50. BD ( 1) N 34 - H 41           | /294. RY*( 12)Zn 1 | 0,06          |
| 50. BD ( 1) N 34 - H 41           | /297. RY*( 15)Zn 1 | 0,09          |
| 51. BD ( 1) N 34 - H 42           | /242. LP*( 6)Zn 1  | 1,87          |
| 51. BD ( 1) N 34 - H 42           | /244. LP*( 8)Zn 1  | 0,26          |
| 51. BD ( 1) N 34 - H 42           | /245. LP*( 9)Zn 1  | 8,09          |
| 51. BD ( 1) N 34 - H 42           | /283. RY*( 1)Zn 1  | 0,12          |
| 51. BD ( 1) N 34 - H 42           | /284. RY*( 2)Zn 1  | 0,15          |
| 51. BD ( 1) N 34 - H 42           | /289. RY*( 7)Zn 1  | 0,34          |
| 51. BD ( 1) N 34 - H 42           | /290. RY*( 8)Zn 1  | 0,2           |
| 51. BD ( 1) N 34 - H 42           | /292. RY*( 10)Zn 1 | 0,16          |
| 184. CR ( 1) N 34                 | /242. LP*( 6)Zn 1  | 1,26          |
| 184. CR ( 1) N 34                 | /245. LP*( 9)Zn 1  | 5,45          |
| 184. CR ( 1) N 34                 | /284. RY*( 2)Zn 1  | 0,06          |
| 184. CR ( 1) N 34                 | /287. RY*( 5)Zn 1  | 0,07          |
| 184. CR ( 1) N 34                 | /289. RY*( 7)Zn 1  | 0,08          |
| 258. LP ( 1) N 34                 | /242. LP*( 6)Zn 1  | 44,54         |
| 258. LP ( 1) N 34                 | /244. LP*( 8)Zn 1  | 0,45          |
| 258. LP ( 1) N 34                 | /245. LP*( 9)Zn 1  | 46,26         |
| 258. LP ( 1) N 34                 | /287. RY*( 5)Zn 1  | 0,79          |
| 258. LP ( 1) N 34                 | /288. RY*( 6)Zn 1  | 0,18          |
| 258. LP ( 1) N 34                 | /289. RY*( 7)Zn 1  | 0,22          |
| 258. LP ( 1) N 34                 | /292. RY*( 10)Zn 1 | 0,66          |
| 258. LP ( 1) N 34                 | /293. RY*( 11)Zn 1 | 0,05          |
| 258. LP ( 1) N 34                 | /296. RY*( 14)Zn 1 | 0,1           |
| 258. LP ( 1) N 34                 | /297. RY*( 15)Zn 1 | 0,15          |
| 258. LP ( 1) N 34                 | /300. RY*( 18)Zn 1 | 0,06          |
| <b>Total Zn-N<sub>quest</sub></b> |                    | <b>143,64</b> |

## 6. Cartesian coordinates

131

### Complex 1a-P6 Conformer 1

|    |            |            |            |
|----|------------|------------|------------|
| Zn | 1.7020786  | 0.2299911  | -0.5566790 |
| N  | 1.5772213  | 2.3130663  | -0.7842127 |
| N  | 3.8011509  | 0.3978941  | -0.6763781 |
| N  | -0.2915683 | 0.1093835  | -1.2208351 |
| N  | 1.9089164  | -1.8118581 | -0.9796766 |
| C  | 2.0900449  | 4.5731005  | -0.7702050 |
| C  | 3.9879914  | 2.8813096  | -0.5816543 |
| C  | 5.9059545  | 1.2494095  | -0.2052080 |
| C  | 2.6154865  | 3.2147724  | -0.7169669 |
| C  | 4.5170829  | 1.5630581  | -0.5181112 |
| C  | 0.7212564  | 4.4652170  | -0.8180428 |
| H  | -0.0124968 | 5.2778371  | -0.8852408 |
| C  | 6.0052099  | -0.1205965 | -0.1744132 |
| H  | 6.8946540  | -0.7202039 | 0.0536015  |
| C  | -1.2088197 | 1.1390039  | -1.1647685 |
| C  | 3.0686220  | -2.5467950 | -0.8546244 |
| C  | -2.5510689 | 0.6038780  | -1.3388742 |
| C  | 2.7844712  | -3.9559814 | -1.0799843 |
| C  | -1.0018877 | -1.0554725 | -1.4247020 |
| C  | 0.8991426  | -2.7042944 | -1.2684714 |
| C  | -2.4234869 | -0.7567605 | -1.4988627 |
| C  | -0.4632173 | -2.3686542 | -1.4651327 |
| C  | 1.4381015  | -4.0529835 | -1.3416315 |
| C  | 0.4131436  | 3.0406823  | -0.8251387 |
| C  | 4.6818174  | -0.6437820 | -0.4856893 |
| C  | -0.8993625 | 2.5048619  | -0.9216039 |
| C  | 4.3557803  | -2.0225916 | -0.5658302 |
| H  | -3.2285061 | -1.4878947 | -1.6369410 |
| H  | 0.8664279  | -4.9543532 | -1.5934106 |
| H  | 3.5258590  | -4.7641517 | -1.0758366 |
| H  | 2.6897611  | 5.4913225  | -0.7873471 |
| H  | 6.6984656  | 1.9805844  | -0.0057205 |
| H  | -3.4856777 | 1.1719020  | -1.3377396 |
| N  | 1.6968216  | 0.4511450  | 1.5883054  |
| C  | 1.2110296  | -0.6269381 | 2.4765100  |
| C  | -0.1428371 | -1.1320897 | 1.9467985  |
| C  | -0.6744722 | -2.3198346 | 2.7736553  |
| C  | 0.3558029  | -3.4613103 | 2.8076886  |
| C  | 2.2222297  | -1.7831453 | 2.5213091  |
| C  | 1.7065425  | -2.9682468 | 3.3496661  |
| H  | 1.1406916  | 1.3058622  | 1.8175111  |
| H  | 2.6764839  | 0.6828724  | 1.8265302  |
| H  | 2.4302235  | -2.1101905 | 1.4794292  |
| H  | 3.1841507  | -1.4040916 | 2.9361813  |
| H  | 1.0639864  | -0.2324041 | 3.5080643  |
| H  | 2.4542385  | -3.7929047 | 3.3377901  |
| H  | 1.5891679  | -2.6592235 | 4.4149953  |
| H  | 0.5057449  | -3.8469242 | 1.7707055  |
| H  | -0.0323662 | -4.3077644 | 3.4163656  |
| H  | -1.6271748 | -2.6751035 | 2.3196718  |
| H  | -0.9088014 | -1.9700566 | 3.8062345  |
| H  | 0.0604871  | -1.5066721 | 0.9220966  |
| N  | -1.1869153 | -0.1110637 | 1.7503966  |
| C  | -1.5270627 | 1.0082991  | 2.4395855  |
| S  | -0.5249689 | 1.9619008  | 3.4142258  |
| H  | -1.8373482 | -0.3734091 | 0.9960596  |
| N  | -2.8328802 | 1.4566061  | 2.2460680  |
| H  | -2.9475352 | 2.4529096  | 2.4569985  |
| C  | -3.9153645 | 0.8106578  | 1.6308302  |
| C  | -4.1145172 | -0.5816913 | 1.7420053  |
| C  | -4.8295680 | 1.5750522  | 0.8730996  |
| C  | -5.1346008 | -1.2055313 | 1.0105036  |

|   |            |            |            |
|---|------------|------------|------------|
| C | -6.0091867 | -0.4602104 | 0.2062258  |
| C | -5.8583372 | 0.9376430  | 0.1685496  |
| H | -3.4667483 | -1.1842325 | 2.3933150  |
| H | -4.7080254 | 2.6662219  | 0.7987083  |
| H | -6.7990960 | -0.9562906 | -0.3739894 |
| C | -2.0319184 | 3.4435400  | -0.6729796 |
| C | -2.0921337 | 4.1218075  | 0.5709577  |
| H | -1.2873834 | 3.9590275  | 1.3077896  |
| C | -3.1757852 | 4.9496871  | 0.8850535  |
| H | -3.2187733 | 5.4591675  | 1.8613089  |
| C | -4.2271073 | 5.1143862  | -0.0400598 |
| C | -5.4301972 | 5.9270246  | 0.3741684  |
| C | -4.1674383 | 4.4761956  | -1.2893522 |
| H | -4.9870711 | 4.6067814  | -2.0102708 |
| C | -3.0720257 | 3.6570237  | -1.6044892 |
| H | -3.0240115 | 3.1695356  | -2.5904715 |
| C | 4.9679512  | 4.0019921  | -0.4525481 |
| C | 4.9274250  | 4.8818238  | 0.6540786  |
| H | 4.1441145  | 4.7480240  | 1.4173958  |
| C | 5.8795292  | 5.8987480  | 0.7963714  |
| H | 5.8464497  | 6.5703751  | 1.6691620  |
| C | 6.8912506  | 6.0550469  | -0.1711228 |
| C | 7.9356218  | 7.1277993  | 0.0340267  |
| C | 6.9347776  | 5.2000801  | -1.2848125 |
| H | 7.7197103  | 5.3316385  | -2.0445092 |
| C | 5.9788439  | 4.1828988  | -1.4222183 |
| H | 6.0126370  | 3.5099618  | -2.2939078 |
| C | -1.4299574 | -3.4817085 | -1.7048844 |
| C | -2.1173933 | -3.5814792 | -2.9339868 |
| H | -1.9009102 | -2.8511506 | -3.7299348 |
| C | -3.0693407 | -4.5893769 | -3.1449113 |
| H | -3.6018915 | -4.6581793 | -4.1054579 |
| C | -3.3453951 | -5.5144741 | -2.1243175 |
| C | -4.3900583 | -6.5907827 | -2.3039806 |
| C | -2.6568068 | -5.4376081 | -0.8992343 |
| H | -2.8840685 | -6.1559430 | -0.0960154 |
| C | -1.7066903 | -4.4305502 | -0.6952857 |
| H | -1.1844304 | -4.3538195 | 0.2716120  |
| C | 5.4470288  | -3.0115254 | -0.3151605 |
| C | 5.3683799  | -3.8866819 | 0.7939369  |
| H | 4.4971948  | -3.8191576 | 1.4656994  |
| C | 6.3786475  | -4.8236812 | 1.0422405  |
| H | 6.3075686  | -5.4995689 | 1.9092710  |
| C | 7.4902907  | -4.9031808 | 0.1805197  |
| C | 8.5744263  | -5.9135806 | 0.4800318  |
| C | 7.5831790  | -4.0407635 | -0.9249646 |
| H | 8.4477172  | -4.1120463 | -1.6018308 |
| C | 6.5682103  | -3.1029106 | -1.1686325 |
| H | 6.6338830  | -2.4346330 | -2.0419586 |
| C | -5.2677864 | -2.7085404 | 1.1304615  |
| C | -6.7219084 | 1.7658814  | -0.7581135 |
| F | -6.3153761 | 6.1028513  | -0.6314010 |
| F | -5.0680487 | 7.1555385  | 0.8254117  |
| F | -6.0893807 | 5.3142673  | 1.3973083  |
| F | 8.7876647  | 7.2293909  | -1.0145537 |
| F | 8.6831405  | 6.8747733  | 1.1411092  |
| F | 7.3659530  | 8.3468804  | 0.2173406  |
| F | 9.4802802  | -6.0150595 | -0.5220945 |
| F | 8.0504569  | -7.1501876 | 0.6840613  |
| F | 9.2564402  | -5.5864514 | 1.6094672  |
| F | -7.9020917 | 1.1662176  | -1.0295401 |
| F | -6.0864346 | 1.9586201  | -1.9533650 |
| F | -6.9811644 | 2.9923380  | -0.2504169 |
| F | -6.1221654 | -3.2237858 | 0.2229986  |
| F | -5.6975882 | -3.0743869 | 2.3622194  |
| F | -4.0562517 | -3.3115763 | 0.9451253  |
| F | -4.9656723 | -6.5559880 | -3.5296654 |
| F | -5.3821045 | -6.4656778 | -1.3835884 |
| F | -3.8572051 | -7.8296608 | -2.1381308 |

131

**Complex 1a-P6 Conformer 2**

|    |            |            |            |
|----|------------|------------|------------|
| Zn | 1.7342593  | 0.2439185  | -0.5356646 |
| N  | -0.2447469 | 0.1628146  | -1.2216276 |
| N  | 1.6389269  | 2.3377641  | -0.6918250 |
| N  | 1.9571313  | -1.7722147 | -1.0805918 |
| N  | 3.8343254  | 0.4067864  | -0.5750661 |
| C  | -2.4777705 | 0.7014510  | -1.5065338 |
| C  | -0.8323230 | 2.5570790  | -0.8869599 |
| C  | 0.7994097  | 4.4968892  | -0.6709941 |
| C  | -1.1470984 | 1.2058244  | -1.1987018 |
| C  | 0.4812142  | 3.0754376  | -0.7278533 |
| C  | -2.3551067 | -0.6526855 | -1.7191095 |
| H  | -3.1488649 | -1.3542294 | -2.0013956 |
| C  | 2.1685363  | 4.5929600  | -0.6116350 |
| H  | 2.7753267  | 5.5065649  | -0.5968363 |
| C  | 0.9253817  | -2.6551090 | -1.3104763 |
| C  | 4.5745058  | 1.5622976  | -0.4656901 |
| C  | 1.4090029  | -4.0228287 | -1.1935957 |
| C  | 5.9796790  | 1.2299140  | -0.2635018 |
| C  | 3.0856199  | -2.5302619 | -0.8430481 |
| C  | 4.7125440  | -0.6454487 | -0.4499033 |
| C  | 2.7492932  | -3.9450140 | -0.8981192 |
| C  | 4.3732873  | -2.0196917 | -0.5374601 |
| C  | 6.0645135  | -0.1413744 | -0.2541206 |
| C  | -0.9534272 | -0.9834322 | -1.5162078 |
| C  | 2.6835714  | 3.2300393  | -0.5982264 |
| C  | -0.4272450 | -2.3009161 | -1.5503226 |
| C  | 4.0555768  | 2.8846791  | -0.4955520 |
| H  | 3.4429044  | -4.7751353 | -0.7193095 |
| H  | 6.9655520  | -0.7567040 | -0.1411367 |
| H  | 6.7966143  | 1.9502396  | -0.1368662 |
| H  | -3.3989698 | 1.2864179  | -1.5761182 |
| H  | 0.0725337  | 5.3169722  | -0.7196352 |
| H  | 0.8008506  | -4.9281509 | -1.3067704 |
| N  | 1.6241560  | 0.3664350  | 1.6094004  |
| C  | 1.1031480  | -0.7338143 | 2.4492818  |
| C  | -0.2504687 | -1.2095602 | 1.8895711  |
| C  | -0.8084656 | -2.3855015 | 2.7166253  |
| C  | 0.1888338  | -3.5553359 | 2.7295412  |
| C  | 2.0931197  | -1.9093124 | 2.4719240  |
| C  | 1.5552273  | -3.1052636 | 3.2708171  |
| H  | 1.0643872  | 1.2169393  | 1.8447710  |
| H  | 2.5945167  | 0.5855916  | 1.8926692  |
| H  | 2.3032907  | -2.2170505 | 1.4248886  |
| H  | 3.0597764  | -1.5565474 | 2.9002946  |
| H  | 0.9449413  | -0.3707345 | 3.4906283  |
| H  | 2.2850003  | -3.9439156 | 3.2285115  |
| H  | 1.4525582  | -2.8215360 | 4.3447861  |
| H  | 0.3139540  | -3.9326615 | 1.6867493  |
| H  | -0.2172648 | -4.3972346 | 3.3327006  |
| H  | -1.7795851 | -2.7135248 | 2.2822664  |
| H  | -1.0182525 | -2.0306341 | 3.7528833  |
| H  | -0.0351590 | -1.5862575 | 0.8677245  |
| N  | -1.2761125 | -0.1749915 | 1.6721442  |
| C  | -1.6243806 | 0.9366153  | 2.3686804  |
| S  | -0.6499782 | 1.8391782  | 3.4161066  |
| H  | -1.8935908 | -0.4075112 | 0.8813558  |
| N  | -2.9077572 | 1.4181090  | 2.1179807  |
| H  | -3.0106923 | 2.4158278  | 2.3287523  |
| C  | -3.9742747 | 0.8010873  | 1.4470693  |
| C  | -4.8161778 | 1.5843813  | 0.6310728  |
| C  | -4.2378143 | -0.5810568 | 1.5806305  |
| C  | -5.8371572 | 0.9758856  | -0.1121962 |
| C  | -6.0617276 | -0.4078750 | -0.0373381 |
| C  | -5.2659365 | -1.1714180 | 0.8353912  |
| H  | -4.6460062 | 2.6675545  | 0.5432071  |
| H  | -3.6444316 | -1.1905949 | 2.2754568  |
| H  | -6.8529305 | -0.8812905 | -0.6353218 |

|   |            |            |            |
|---|------------|------------|------------|
| C | -1.3837896 | -3.4207732 | -1.7957611 |
| C | -1.2660939 | -4.2334182 | -2.9442906 |
| H | -0.4692680 | -4.0184382 | -3.6739294 |
| C | -2.1498091 | -5.3013466 | -3.1621702 |
| H | -2.0536146 | -5.9272706 | -4.0620806 |
| C | -3.1639054 | -5.5707795 | -2.2278108 |
| C | -4.1421399 | -6.7035757 | -2.4324351 |
| C | -3.2942785 | -4.7700795 | -1.0775031 |
| H | -4.0841316 | -4.9839304 | -0.3439691 |
| C | -2.4121988 | -3.7039703 | -0.8684133 |
| H | -2.5129698 | -3.0794295 | 0.0321977  |
| C | -1.9608749 | 3.5029681  | -0.6461752 |
| C | -2.9545806 | 3.7803747  | -1.6107605 |
| H | -2.8686744 | 3.3451107  | -2.6181584 |
| C | -4.0527695 | 4.5973411  | -1.3010542 |
| H | -4.8376131 | 4.7766157  | -2.0498915 |
| C | -4.1627338 | 5.1684623  | -0.0223674 |
| C | -5.3939769 | 5.9424038  | 0.3827807  |
| C | -3.1522022 | 4.9479467  | 0.9353186  |
| H | -3.2301988 | 5.4100346  | 1.9326352  |
| C | -2.0635550 | 4.1247956  | 0.6240847  |
| H | -1.2898845 | 3.9195762  | 1.3834193  |
| C | 5.4554602  | -3.0137474 | -0.2666643 |
| C | 5.9221117  | -3.8819629 | -1.2769527 |
| H | 5.4970171  | -3.8033421 | -2.2903277 |
| C | 6.9153872  | -4.8346729 | -1.0039618 |
| H | 7.2734349  | -5.5064271 | -1.7986190 |
| C | 7.4589536  | -4.9288107 | 0.2881485  |
| C | 8.5027646  | -5.9683970 | 0.6261700  |
| C | 7.0132425  | -4.0608621 | 1.3038070  |
| H | 7.4412217  | -4.1363808 | 2.3162271  |
| C | 6.0208124  | -3.1130171 | 1.0261180  |
| H | 5.6611302  | -2.4389870 | 1.8203049  |
| C | 5.0484393  | 3.9969461  | -0.3898336 |
| C | 6.0038147  | 4.1983180  | -1.4099048 |
| H | 5.9844853  | 3.5483870  | -2.2994080 |
| C | 6.9733161  | 5.2056070  | -1.2990790 |
| H | 7.7163715  | 5.3521706  | -2.0972204 |
| C | 6.9973669  | 6.0306227  | -0.1627349 |
| C | 8.0544659  | 7.0964252  | 0.0082239  |
| C | 6.0392082  | 5.8555140  | 0.8544918  |
| H | 6.0592725  | 6.5043155  | 1.7448790  |
| C | 5.0740034  | 4.8474455  | 0.7392722  |
| H | 4.3327271  | 4.6981412  | 1.5408640  |
| C | -6.6083664 | 1.8272978  | -1.0991776 |
| C | -5.5879931 | -2.6351211 | 1.0420094  |
| F | 8.8801576  | 7.1828048  | -1.0624560 |
| F | 8.8272620  | 6.8470243  | 1.0984699  |
| F | 7.4985116  | 8.3214831  | 0.1952110  |
| F | 8.9015635  | -6.6738746 | -0.4588101 |
| F | 8.0274760  | -6.8591517 | 1.5365513  |
| F | 9.6078385  | -5.4012240 | 1.1759522  |
| F | -6.1518892 | 6.3028894  | -0.6766973 |
| F | -5.0735960 | 7.0699560  | 1.0671436  |
| F | -6.1779817 | 5.1947872  | 1.2090273  |
| F | -5.9842624 | -3.2295504 | -0.1086087 |
| F | -6.5804405 | -2.8012941 | 1.9459255  |
| F | -4.5089100 | -3.3306503 | 1.5093159  |
| F | -3.8380838 | -7.4606494 | -3.5137735 |
| F | -5.4067266 | -6.2370929 | -2.6043345 |
| F | -4.1728844 | -7.5266010 | -1.3518369 |
| F | -7.7519217 | 1.2353866  | -1.5065483 |
| F | -5.8545576 | 2.0585831  | -2.2170325 |
| F | -6.9223246 | 3.0383180  | -0.5853384 |



131

**Complex 1a-P6 Conformer 3**

|    |            |            |            |
|----|------------|------------|------------|
| Zn | -1.6760564 | 0.1741755  | -0.6062376 |
| N  | -2.7753398 | 1.9509102  | -0.4820700 |
| N  | 0.0286334  | 1.2863088  | -1.0801683 |
| N  | -3.5214506 | -0.8623039 | -0.8914900 |
| N  | -0.6894848 | -1.5315132 | -1.3351900 |
| C  | -3.2900177 | 4.1648569  | -0.0238126 |
| C  | -0.8841906 | 3.5519048  | -0.5756493 |
| C  | 1.4662103  | 3.0757521  | -1.3920206 |
| C  | -2.2427851 | 3.2134647  | -0.3676918 |
| C  | 0.1370836  | 2.6567039  | -0.9784801 |
| C  | -4.4607307 | 3.4504567  | 0.0503062  |
| H  | -5.4660249 | 3.8355096  | 0.2583962  |
| C  | 2.1537238  | 1.9332765  | -1.7323087 |
| H  | 3.1846146  | 1.8625450  | -2.0935139 |
| C  | -4.7475362 | -0.3745827 | -0.4924403 |
| C  | 0.6496872  | -1.6320488 | -1.6461885 |
| C  | -5.6848135 | -1.4763695 | -0.3148318 |
| C  | 0.9631200  | -3.0032827 | -2.0243893 |
| C  | -3.6426808 | -2.2298761 | -0.9680715 |
| C  | -1.2375519 | -2.7880119 | -1.5004329 |
| C  | -4.9977453 | -2.6297375 | -0.6073485 |
| C  | -2.5972257 | -3.1374402 | -1.2916497 |
| C  | -0.2076477 | -3.7171111 | -1.9399974 |
| C  | -4.1212800 | 2.0582171  | -0.2200262 |
| C  | 1.2473334  | 0.8151099  | -1.5209258 |
| C  | -5.0500751 | 0.9841327  | -0.2090554 |
| C  | 1.5786649  | -0.5562706 | -1.7058180 |
| H  | -5.3705719 | -3.6596903 | -0.5562514 |
| H  | -0.3645488 | -4.7713432 | -2.1979054 |
| H  | 1.9403550  | -3.3661927 | -2.3635738 |
| H  | -3.1494719 | 5.2415489  | 0.1305465  |
| H  | 1.8173152  | 4.1138619  | -1.4457768 |
| H  | -6.7255579 | -1.3846288 | 0.0188277  |
| N  | -1.8675046 | -0.2635111 | 1.4750740  |
| C  | -1.1904654 | -1.5140317 | 1.8844976  |
| C  | 0.1542275  | -1.1906266 | 2.5654904  |
| C  | 0.9179390  | -2.4924918 | 2.8725191  |
| C  | 0.0710453  | -3.4381749 | 3.7429725  |
| C  | -2.0462160 | -2.4197245 | 2.7827870  |
| C  | -1.2995126 | -3.7235798 | 3.1061111  |
| H  | -2.8904737 | -0.3463823 | 1.5901401  |
| H  | -1.5459910 | 0.5499048  | 2.0498449  |
| H  | -2.2995994 | -1.8747980 | 3.7237769  |
| H  | -3.0059386 | -2.6408138 | 2.2604046  |
| H  | -0.9614987 | -2.0857980 | 0.9564168  |
| H  | -1.9132945 | -4.3657119 | 3.7752442  |
| H  | -1.1535359 | -4.2967634 | 2.1605007  |
| H  | -0.0788824 | -2.9693518 | 4.7439034  |
| H  | 0.6260473  | -4.3862602 | 3.9176785  |
| H  | 1.8785739  | -2.2552531 | 3.3812237  |
| H  | 1.1777647  | -2.9942704 | 1.9089814  |
| H  | -0.0594893 | -0.6532001 | 3.5174572  |
| N  | 0.9892224  | -0.2827629 | 1.7790279  |
| C  | 1.1264219  | 1.0570367  | 1.9837975  |
| S  | 0.0299622  | 2.0317676  | 2.8163261  |
| H  | 1.4816163  | -0.6856482 | 0.9691096  |
| N  | 2.2726009  | 1.6261983  | 1.4483569  |
| H  | 2.1704298  | 2.6177702  | 1.2124752  |
| C  | 3.5378137  | 1.0615597  | 1.2337061  |
| C  | 4.4537396  | 1.7618057  | 0.4119016  |
| C  | 3.9615896  | -0.1391639 | 1.8393075  |
| C  | 5.7205691  | 1.2331709  | 0.1501129  |
| C  | 6.1276985  | 0.0088833  | 0.7113593  |
| C  | 5.2390696  | -0.6520603 | 1.5672269  |
| H  | 4.1628075  | 2.7246102  | -0.0294743 |
| H  | 3.3007409  | -0.6817044 | 2.5265567  |
| H  | 7.1052527  | -0.4258395 | 0.4649927  |

|   |             |            |            |
|---|-------------|------------|------------|
| C | -6.4576797  | 1.3065385  | 0.1758976  |
| C | -7.5187485  | 1.1294063  | -0.7385039 |
| H | -7.2986364  | 0.7468985  | -1.7481858 |
| C | -8.8382680  | 1.4462282  | -0.3806818 |
| H | -9.6567657  | 1.3135319  | -1.1043652 |
| C | -9.1145743  | 1.9431857  | 0.9037347  |
| C | -10.5192372 | 2.3056997  | 1.3267224  |
| C | -8.0688168  | 2.1159556  | 1.8307703  |
| H | -8.2889916  | 2.4966650  | 2.8410729  |
| C | -6.7545104  | 1.8014958  | 1.4675086  |
| H | -5.9356590  | 1.9353385  | 2.1927974  |
| C | -0.4877574  | 4.9810839  | -0.3813704 |
| C | -0.8841663  | 5.9791226  | -1.2958248 |
| H | -1.4960075  | 5.6968615  | -2.1677416 |
| C | -0.5018535  | 7.3164884  | -1.1073126 |
| H | -0.8114573  | 8.0896910  | -1.8264805 |
| C | 0.2831983   | 7.6690724  | 0.0032304  |
| C | 0.7098704   | 9.0999095  | 0.2399994  |
| C | 0.6835011   | 6.6820498  | 0.9253456  |
| H | 1.2881447   | 6.9645867  | 1.8020328  |
| C | 0.3004105   | 5.3485122  | 0.7335390  |
| H | 0.5777776   | 4.5731870  | 1.4684467  |
| C | -2.9663822  | -4.5770034 | -1.4317282 |
| C | -2.3797577  | -5.5654909 | -0.6066032 |
| H | -1.6408849  | -5.2601610 | 0.1518163  |
| C | -2.7319541  | -6.9139519 | -0.7369655 |
| H | -2.2735780  | -7.6732359 | -0.0834063 |
| C | -3.6835379  | -7.3009373 | -1.7002906 |
| C | -4.0455632  | -8.7628240 | -1.8208595 |
| C | -4.2755423  | -6.3332594 | -2.5287755 |
| H | -5.0135099  | -6.6381060 | -3.2859996 |
| C | -3.9167901  | -4.9843310 | -2.3944999 |
| H | -4.3727218  | -4.2261175 | -3.0508967 |
| C | 3.0005345   | -0.9103740 | -1.9997977 |
| C | 3.7000850   | -1.7799234 | -1.1308955 |
| H | 3.1964351   | -2.1798394 | -0.2372003 |
| C | 5.0323786   | -2.1290032 | -1.3757009 |
| H | 5.5608755   | -2.8025141 | -0.6841470 |
| C | 5.7054872   | -1.5937068 | -2.4876596 |
| C | 7.1564256   | -1.9565658 | -2.6942603 |
| C | 5.0258588   | -0.7384000 | -3.3700868 |
| H | 5.5495063   | -0.3288238 | -4.2464818 |
| C | 3.6818030   | -0.4141203 | -3.1347361 |
| H | 3.1421676   | 0.2274107  | -3.8490258 |
| C | 6.6804955   | 1.9671549  | -0.7624963 |
| C | 5.5922509   | -1.9887265 | 2.1775645  |
| F | 0.2484484   | 9.9440927  | -0.7135889 |
| F | 2.0644589   | 9.2121585  | 0.2630118  |
| F | 0.2605342   | 9.5555171  | 1.4381196  |
| F | -4.9800429  | -8.9867642 | -2.7746286 |
| F | -4.5336177  | -9.2473745 | -0.6490372 |
| F | -2.9574749  | -9.5155963 | -2.1308403 |
| F | -11.4312241 | 2.0846132  | 0.3507036  |
| F | -10.6042655 | 3.6168985  | 1.6742941  |
| F | -10.9033914 | 1.5880114  | 2.4151607  |
| F | 7.7010851   | -1.3456668 | -3.7695825 |
| F | 7.3120603   | -3.2960333 | -2.8598802 |
| F | 7.9091078   | -1.6159471 | -1.6078321 |
| F | 7.0081900   | 1.2113390  | -1.8424793 |
| F | 7.8362058   | 2.2631635  | -0.1216003 |
| F | 6.8252829   | -2.4110849 | 1.8266025  |
| F | 4.7063971   | -2.9526492 | 1.7704303  |
| F | 5.5264186   | -1.9596140 | 3.5302835  |
| F | 6.1587575   | 3.1280553  | -1.2298326 |

131

**Complex 1a-P6 Conformer 4**

|    |            |            |            |
|----|------------|------------|------------|
| Zn | -1.3805462 | 0.3200872  | -0.6977626 |
| N  | -1.4696678 | 2.3964678  | -0.9344873 |
| N  | 0.6260930  | 0.3504190  | -1.2535963 |
| N  | -3.5088172 | 0.2772662  | -0.8854050 |
| N  | -1.4087462 | -1.7462534 | -1.1248809 |
| C  | -0.8142142 | 4.6166248  | -0.8255973 |
| C  | 0.9674026  | 2.8219277  | -1.1364376 |
| C  | 2.8036430  | 1.1084260  | -1.4914801 |
| C  | -0.3813886 | 3.2332063  | -0.9769153 |
| C  | 1.4136800  | 1.4851949  | -1.2940652 |
| C  | -2.1766333 | 4.5867809  | -0.6524058 |
| H  | -2.8508803 | 5.4370010  | -0.4939995 |
| C  | 2.8385215  | -0.2608396 | -1.5660197 |
| H  | 3.7362738  | -0.8773184 | -1.6725141 |
| C  | -4.3195215 | 1.3585975  | -0.6158180 |
| C  | -0.2992595 | -2.5381115 | -1.3331943 |
| C  | -5.6923417 | 0.9124496  | -0.4236048 |
| C  | -0.7150239 | -3.9117952 | -1.5766382 |
| C  | -4.3135843 | -0.8382087 | -0.8680781 |
| C  | -2.5146461 | -2.5712663 | -1.2192690 |
| C  | -5.6873446 | -0.4540711 | -0.5696452 |
| C  | -3.8670248 | -2.1757635 | -1.0525204 |
| C  | -2.0880509 | -3.9288473 | -1.5142181 |
| C  | -2.5765465 | 3.1868273  | -0.7222696 |
| C  | 1.4671371  | -0.7308376 | -1.4109597 |
| C  | -3.9024933 | 2.7139111  | -0.5439070 |
| C  | 1.0544508  | -2.0944800 | -1.3857743 |
| H  | -6.5392344 | -1.1374450 | -0.4743129 |
| H  | -2.7525514 | -4.7815493 | -1.6970431 |
| H  | -0.0494049 | -4.7472715 | -1.8245170 |
| H  | -0.1595968 | 5.4961903  | -0.8481082 |
| H  | 3.6564788  | 1.7949456  | -1.5254732 |
| H  | -6.5513829 | 1.5603358  | -0.2116028 |
| N  | -1.6790857 | 0.4850752  | 1.4262248  |
| C  | -2.2892937 | -0.7749854 | 1.9141226  |
| C  | -1.2518414 | -1.6479227 | 2.6463789  |
| C  | -1.8488890 | -3.0497308 | 2.8607400  |
| C  | -3.1609790 | -2.9587521 | 3.6664714  |
| C  | -3.5462893 | -0.6017219 | 2.7748423  |
| C  | -4.1751398 | -1.9802226 | 3.0429085  |
| H  | -2.3605598 | 1.2597713  | 1.4824649  |
| H  | -0.8609165 | 0.7549184  | 2.0152454  |
| H  | -3.2842104 | -0.0895852 | 3.7314908  |
| H  | -4.2723440 | 0.0461670  | 2.2302588  |
| H  | -2.6059388 | -1.3488778 | 1.0202883  |
| H  | -5.0647840 | -1.8801427 | 3.7029285  |
| H  | -4.5456571 | -2.3902768 | 2.0748120  |
| H  | -2.9173003 | -2.6208950 | 4.7010791  |
| H  | -3.6133633 | -3.9708492 | 3.7645276  |
| H  | -1.1096744 | -3.6925348 | 3.3876503  |
| H  | -2.0379670 | -3.5143204 | 1.8620490  |
| H  | -1.0289133 | -1.1839055 | 3.6326451  |
| N  | 0.0310785  | -1.7105168 | 1.9482496  |
| C  | 1.1309588  | -0.9555674 | 2.2811255  |
| S  | 1.0718407  | 0.3448719  | 3.3568128  |
| H  | 0.0220236  | -2.1674457 | 1.0244391  |
| N  | 2.2820764  | -1.4214909 | 1.6767811  |
| H  | 2.2002939  | -2.3548811 | 1.2534763  |
| C  | 3.5222149  | -0.8194326 | 1.4152650  |
| C  | 3.7967420  | 0.5546927  | 1.5905171  |
| C  | 4.5125757  | -1.6512978 | 0.8469199  |
| C  | 5.0265776  | 1.0711447  | 1.1666467  |
| C  | 6.0058828  | 0.2560867  | 0.5729095  |
| C  | 5.7305493  | -1.1094337 | 0.4152111  |
| H  | 3.0341737  | 1.2118452  | 2.0252424  |
| H  | 4.3147425  | -2.7234075 | 0.6905887  |
| H  | 6.9628927  | 0.6792660  | 0.2358646  |

|   |            |            |            |
|---|------------|------------|------------|
| C | -4.9523883 | 3.7345495  | -0.2302696 |
| C | -5.5194546 | 3.8032465  | 1.0627260  |
| H | -5.1817330 | 3.0934389  | 1.8354786  |
| C | -6.4905658 | 4.7646144  | 1.3699791  |
| H | -6.9175577 | 4.8179586  | 2.3840376  |
| C | -6.9138307 | 5.6752574  | 0.3828844  |
| C | -7.9825077 | 6.6870276  | 0.7320657  |
| C | -6.3622960 | 5.6161317  | -0.9082279 |
| H | -6.6962959 | 6.3266616  | -1.6793817 |
| C | -5.3881454 | 4.6518051  | -1.2098248 |
| H | -4.9545744 | 4.6031110  | -2.2215354 |
| C | 2.0150760  | 3.8879230  | -1.0816515 |
| C | 2.2551395  | 4.5709859  | 0.1318515  |
| H | 1.6595182  | 4.3110976  | 1.0211466  |
| C | 3.2579664  | 5.5421671  | 0.2178827  |
| H | 3.4572187  | 6.0483849  | 1.1752734  |
| C | 4.0422304  | 5.8408494  | -0.9108534 |
| C | 5.1689036  | 6.8346769  | -0.7634091 |
| C | 3.8054245  | 5.1818400  | -2.1278049 |
| H | 4.4177744  | 5.4242768  | -3.0092443 |
| C | 2.7930037  | 4.2148732  | -2.2120668 |
| H | 2.6037588  | 3.6952481  | -3.1650355 |
| C | -4.8985384 | -3.2531539 | -1.0237202 |
| C | -5.9639000 | -3.2686766 | -1.9509498 |
| H | -6.0106139 | -2.4891440 | -2.7282466 |
| C | -6.9525809 | -4.2619974 | -1.8962910 |
| H | -7.7768961 | -4.2652760 | -2.6252446 |
| C | -6.8888011 | -5.2606819 | -0.9105159 |
| C | -7.9440687 | -6.3376503 | -0.8133461 |
| C | -5.8252128 | -5.2702084 | 0.0121484  |
| H | -5.7754385 | -6.0540435 | 0.7849931  |
| C | -4.8415233 | -4.2769963 | -0.0478020 |
| H | -4.0125311 | -4.2808143 | 0.6775798  |
| C | 2.1033113  | -3.1538901 | -1.3397739 |
| C | 2.0876904  | -4.1031530 | -0.2822763 |
| H | 1.2492680  | -4.1009827 | 0.4353094  |
| C | 3.1075297  | -5.0502302 | -0.1358924 |
| H | 3.0833187  | -5.7655044 | 0.7016013  |
| C | 4.1762427  | -5.0728112 | -1.0511091 |
| C | 5.2748995  | -6.0926145 | -0.8599103 |
| C | 4.1885806  | -4.1741051 | -2.1294436 |
| H | 5.0170589  | -4.2017316 | -2.8514842 |
| C | 3.1582023  | -3.2349604 | -2.2764589 |
| H | 3.1674194  | -2.5518324 | -3.1394111 |
| C | 5.2899750  | 2.5596938  | 1.2366155  |
| C | 6.6959373  | -1.9878821 | -0.3459144 |
| F | 6.5341521  | 2.8285888  | 1.6975709  |
| F | 4.4058677  | 3.2111244  | 2.0269525  |
| F | 7.9718733  | -1.5535139 | -0.2507752 |
| F | 6.3781161  | -1.9979115 | -1.6774417 |
| F | 6.6609469  | -3.2751247 | 0.0726499  |
| F | 6.2868936  | -5.9317763 | -1.7410872 |
| F | 4.7959899  | -7.3565256 | -1.0125044 |
| F | 5.7955907  | -6.0215721 | 0.3915512  |
| F | 5.8005281  | 7.0833312  | -1.9365043 |
| F | 6.1038543  | 6.3825486  | 0.1135238  |
| F | 4.7228187  | 8.0236750  | -0.2804846 |
| F | -8.1422358 | 7.6234878  | -0.2325972 |
| F | -7.6885696 | 7.3363280  | 1.8887603  |
| F | -9.1879539 | 6.0869100  | 0.9162659  |
| F | 5.2057725  | 3.1113293  | -0.0095973 |
| F | -8.9116388 | -6.1981773 | -1.7500606 |
| F | -8.5488168 | -6.3248149 | 0.4039083  |
| F | -7.4018964 | -7.5739762 | -0.9664558 |

131

**Complex 1a-P6 Conformer 5**

|    |            |            |            |
|----|------------|------------|------------|
| Zn | 1.7370101  | -0.1539830 | -0.5974307 |
| N  | -0.1079203 | 0.5815777  | -1.2680288 |
| N  | 2.4587808  | 1.8221807  | -0.6217830 |
| N  | 1.1597164  | -2.0593958 | -1.2585039 |
| N  | 3.7346039  | -0.8088700 | -0.6365767 |
| C  | -1.9703475 | 1.9519528  | -1.3962273 |
| C  | 0.2486394  | 2.9623642  | -0.6387949 |
| C  | 2.4790683  | 4.0915572  | -0.1538402 |
| C  | -0.5469853 | 1.8797729  | -1.1041550 |
| C  | 1.6580690  | 2.9285580  | -0.4658990 |
| C  | -2.3803558 | 0.6771260  | -1.7151721 |
| H  | -3.3953359 | 0.3492262  | -1.9664529 |
| C  | 3.7827335  | 3.6589536  | -0.1263905 |
| H  | 4.6805035  | 4.2534002  | 0.0813826  |
| C  | -0.1274721 | -2.4565286 | -1.5511761 |
| C  | 4.8679272  | -0.0340186 | -0.5176648 |
| C  | -0.1881918 | -3.9072758 | -1.6372227 |
| C  | 6.0496334  | -0.8863624 | -0.5364628 |
| C  | 1.9205696  | -3.2063256 | -1.1616716 |
| C  | 4.1490045  | -2.1184982 | -0.7019084 |
| C  | 1.0795801  | -4.3735457 | -1.3790892 |
| C  | 3.3088918  | -3.2495247 | -0.8747872 |
| C  | 5.6024791  | -2.1818200 | -0.6337277 |
| C  | -1.2065644 | -0.1769564 | -1.6172957 |
| C  | 3.7552857  | 2.2293535  | -0.4087291 |
| C  | -1.2373446 | -1.5922919 | -1.7308436 |
| C  | 4.8939330  | 1.3802644  | -0.3933537 |
| H  | 1.4137600  | -5.4172192 | -1.3487147 |
| H  | 6.2041256  | -3.0966695 | -0.6956753 |
| H  | 7.0891707  | -0.5392196 | -0.5053964 |
| H  | -2.5962270 | 2.8484380  | -1.3606354 |
| H  | 2.1098997  | 5.1127216  | -0.0001211 |
| H  | -1.0816023 | -4.4950050 | -1.8803429 |
| N  | 1.6387764  | -0.0550693 | 1.5553072  |
| C  | 0.8107710  | -1.0028487 | 2.3302952  |
| C  | -0.6295695 | -0.9740204 | 1.7821063  |
| C  | -1.5281533 | -1.9654681 | 2.5459594  |
| C  | -0.9505605 | -3.3888618 | 2.4593109  |
| C  | 1.3785021  | -2.4265343 | 2.2376071  |
| C  | 0.4938922  | -3.4367268 | 2.9829265  |
| H  | 1.3528153  | 0.9075504  | 1.8281122  |
| H  | 2.6285662  | -0.1423059 | 1.8421445  |
| H  | 1.4639490  | -2.7116330 | 1.1673913  |
| H  | 2.4128179  | -2.4305355 | 2.6530897  |
| H  | 0.7818193  | -0.6927174 | 3.3983457  |
| H  | 0.9131554  | -4.4610296 | 2.8698505  |
| H  | 0.4992357  | -3.2050485 | 4.0739771  |
| H  | -0.9540262 | -3.7199640 | 1.3926749  |
| H  | -1.5970695 | -4.0991660 | 3.0207219  |
| H  | -2.5532987 | -1.9330732 | 2.1131872  |
| H  | -1.6093259 | -1.6358139 | 3.6075223  |
| H  | -0.5580806 | -1.3191097 | 0.7298519  |
| N  | -1.2515267 | 0.3567468  | 1.6696427  |
| C  | -1.2871081 | 1.4005537  | 2.5387595  |
| S  | -0.1692657 | 1.7376585  | 3.7627145  |
| H  | -1.8266238 | 0.4579477  | 0.8219544  |
| N  | -2.3073440 | 2.3261004  | 2.3389935  |
| H  | -2.0976600 | 3.2333533  | 2.7675770  |
| C  | -3.4354074 | 2.2732275  | 1.5059654  |
| C  | -4.1414623 | 1.0727798  | 1.2597133  |
| C  | -3.8769951 | 3.4683021  | 0.8996124  |
| C  | -5.2059664 | 1.0670314  | 0.3509297  |
| C  | -5.6171259 | 2.2439771  | -0.2967399 |
| C  | -4.9517104 | 3.4428102  | 0.0011440  |
| H  | -3.8574717 | 0.1431871  | 1.7699189  |
| H  | -3.3503035 | 4.4137452  | 1.0955777  |
| H  | -6.4454078 | 2.2268159  | -1.0199352 |

|   |            |            |            |
|---|------------|------------|------------|
| C | -2.5723837 | -2.2227037 | -1.9694236 |
| C | -3.1885807 | -2.9754109 | -0.9445938 |
| H | -2.6600833 | -3.1099634 | 0.0121714  |
| C | -4.4580875 | -3.5340513 | -1.1264176 |
| H | -4.9367408 | -4.1000925 | -0.3125304 |
| C | -5.1379086 | -3.3420065 | -2.3418584 |
| C | -6.5555899 | -3.8445139 | -2.4683760 |
| C | -4.5327197 | -2.6115126 | -3.3781198 |
| H | -5.0660296 | -2.4699761 | -4.3304826 |
| C | -3.2569546 | -2.0592486 | -3.1924578 |
| H | -2.7811325 | -1.4836203 | -4.0026312 |
| C | -0.4497102 | 4.2099272  | -0.2059694 |
| C | -0.3520331 | 4.5985230  | 1.1537292  |
| H | 0.2423415  | 3.9815573  | 1.8487134  |
| C | -1.0282467 | 5.7278422  | 1.6280716  |
| H | -0.9535288 | 6.0108025  | 2.6905733  |
| C | -1.8223028 | 6.4919999  | 0.7492995  |
| C | -2.6275897 | 7.6368558  | 1.3152750  |
| C | -1.9096847 | 6.1350138  | -0.6060368 |
| H | -2.5304012 | 6.7311460  | -1.2899380 |
| C | -1.2221738 | 5.0061169  | -1.0785550 |
| H | -1.2857459 | 4.7369613  | -2.1443479 |
| C | 3.9530058  | -4.5887963 | -0.7243931 |
| C | 4.0640085  | -5.4911798 | -1.8035361 |
| H | 3.6687981  | -5.2011069 | -2.7902128 |
| C | 4.6839681  | -6.7391955 | -1.6344789 |
| H | 4.7730865  | -7.4341220 | -2.4831923 |
| C | 5.2015542  | -7.1002917 | -0.3792739 |
| C | 5.8804113  | -8.4319491 | -0.1580861 |
| C | 5.0984098  | -6.2104198 | 0.7070863  |
| H | 5.5011512  | -6.4977678 | 1.6915071  |
| C | 4.4808744  | -4.9671202 | 0.5325978  |
| H | 4.3951940  | -4.2672210 | 1.3797143  |
| C | 6.2271732  | 2.0300736  | -0.2173743 |
| C | 7.0311096  | 1.7511846  | 0.9128165  |
| H | 6.6578764  | 1.0527031  | 1.6789332  |
| C | 8.2843174  | 2.3552691  | 1.0676972  |
| H | 8.9020173  | 2.1337046  | 1.9527784  |
| C | 8.7567094  | 3.2532522  | 0.0912817  |
| C | 10.1099615 | 3.8951433  | 0.2884717  |
| C | 7.9686117  | 3.5449706  | -1.0343956 |
| H | 8.3422860  | 4.2425751  | -1.7990880 |
| C | 6.7138288  | 2.9367384  | -1.1846399 |
| H | 6.0980515  | 3.1555440  | -2.0717728 |
| C | -5.9047459 | -0.2259289 | -0.0110508 |
| C | -5.2870440 | 4.6951569  | -0.7784929 |
| F | 5.8751648  | -9.2081181 | -1.2670491 |
| F | 5.2710606  | -9.1323239 | 0.8347750  |
| F | 7.1760936  | -8.2686533 | 0.2190908  |
| F | -7.2463791 | -0.1227299 | 0.1091617  |
| F | -5.4983282 | -1.2681684 | 0.7541392  |
| F | -5.6450296 | -0.5450489 | -1.3096841 |
| F | -6.5759517 | 4.7153028  | -1.1836182 |
| F | -4.5134458 | 4.7658702  | -1.9038960 |
| F | -5.0536713 | 5.8221445  | -0.0688415 |
| F | -6.9863651 | -3.8611927 | -3.7526649 |
| F | -7.4143286 | -3.0569156 | -1.7647468 |
| F | -6.6876295 | -5.1023954 | -1.9735906 |
| F | 10.4768582 | 4.6628665  | -0.7649621 |
| F | 11.0772579 | 2.9584686  | 0.4686550  |
| F | 10.1231140 | 4.6863390  | 1.3932181  |
| F | -3.2092719 | 8.3905080  | 0.3560033  |
| F | -1.8597762 | 8.4560560  | 2.0776335  |
| F | -3.6198250 | 7.1697609  | 2.1263157  |

131

**Complex 1a-P6 Conformer 6**

|    |            |            |            |
|----|------------|------------|------------|
| Zn | -1.5646770 | 0.3566969  | -0.6490454 |
| N  | -1.5998444 | 2.4435412  | -0.7987911 |
| N  | 0.4452531  | 0.3564355  | -1.1768989 |
| N  | -3.6743515 | 0.3758837  | -0.8478928 |
| N  | -1.6196793 | -1.6987169 | -1.1068767 |
| C  | -0.8829879 | 4.6410909  | -0.6298615 |
| C  | 0.8507947  | 2.8000657  | -0.8981927 |
| C  | 2.6349056  | 1.0806559  | -1.4142759 |
| C  | -0.4865909 | 3.2461748  | -0.7629697 |
| C  | 1.2596954  | 1.4708389  | -1.1565790 |
| C  | -2.2570410 | 4.6570724  | -0.5989424 |
| H  | -2.9160540 | 5.5316530  | -0.5379048 |
| C  | 2.6351369  | -0.2827272 | -1.5740943 |
| H  | 3.5113443  | -0.9191405 | -1.7374587 |
| C  | -4.4850504 | 1.4859264  | -0.7484048 |
| C  | -0.5200001 | -2.5210444 | -1.2221853 |
| C  | -5.8814355 | 1.0719079  | -0.6931785 |
| C  | -0.9497602 | -3.9126232 | -1.2443328 |
| C  | -4.5003069 | -0.7241889 | -0.8535648 |
| C  | -2.7325306 | -2.5151290 | -1.0624399 |
| C  | -5.8912775 | -0.2995090 | -0.7710485 |
| C  | -4.0767935 | -2.0770044 | -0.9379598 |
| C  | -2.3198075 | -3.9081560 | -1.1301034 |
| C  | -2.6939890 | 3.2680102  | -0.6866420 |
| C  | 1.2588339  | -0.7323177 | -1.4012422 |
| C  | -4.0454659 | 2.8350804  | -0.6699956 |
| C  | 0.8313428  | -2.0911241 | -1.3564848 |
| H  | -6.7655918 | -0.9613518 | -0.7828202 |
| H  | -2.9867164 | -4.7778800 | -1.1096003 |
| H  | -0.2989200 | -4.7863084 | -1.3677972 |
| H  | -0.1957718 | 5.4954361  | -0.5935488 |
| H  | 3.4970656  | 1.7573975  | -1.4322097 |
| H  | -6.7456117 | 1.7411299  | -0.6070420 |
| N  | -1.7504017 | 0.4496122  | 1.4774890  |
| C  | -2.1171300 | -0.8658360 | 2.0521650  |
| C  | -0.8955609 | -1.5034720 | 2.7389572  |
| C  | -1.2362239 | -2.9353770 | 3.1938082  |
| C  | -2.4565119 | -2.9377392 | 4.1318102  |
| C  | -3.3167690 | -0.8269840 | 3.0089864  |
| C  | -3.6685875 | -2.2481312 | 3.4817661  |
| H  | -2.5143411 | 1.1327857  | 1.6032224  |
| H  | -0.9003287 | 0.8396783  | 1.9423614  |
| H  | -3.0769329 | -0.1747928 | 3.8826478  |
| H  | -4.1847980 | -0.3679241 | 2.4808967  |
| H  | -2.4027528 | -1.5304599 | 1.2069324  |
| H  | -4.5269522 | -2.2193405 | 4.1887474  |
| H  | -3.9976983 | -2.8487199 | 2.6014441  |
| H  | -2.1895241 | -2.4046712 | 5.0747907  |
| H  | -2.7114234 | -3.9817637 | 4.4192656  |
| H  | -0.3486813 | -3.3794140 | 3.6960260  |
| H  | -1.4518993 | -3.5571270 | 2.2907400  |
| H  | -0.6331074 | -0.8849510 | 3.6269435  |
| N  | 0.2951251  | -1.5047953 | 1.8933350  |
| C  | 1.3893023  | -0.6874154 | 2.0519453  |
| S  | 1.3225257  | 0.7868381  | 2.8718648  |
| H  | 0.2574671  | -2.1030983 | 1.0558872  |
| N  | 2.5265378  | -1.2507954 | 1.5063879  |
| H  | 2.4111285  | -2.2299010 | 1.2153739  |
| C  | 3.8054389  | -0.7573700 | 1.2082212  |
| C  | 4.1934031  | 0.5956275  | 1.3166993  |
| C  | 4.7292994  | -1.6962190 | 0.6955337  |
| C  | 5.4691412  | 0.9834933  | 0.8863111  |
| C  | 6.3895173  | 0.0579500  | 0.3664116  |
| C  | 6.0037331  | -1.2868272 | 0.2789872  |
| H  | 3.4831786  | 1.3355693  | 1.7067197  |
| H  | 4.4409809  | -2.7550419 | 0.5863439  |
| H  | 7.3861979  | 0.3800524  | 0.0359940  |

|   |            |            |            |
|---|------------|------------|------------|
| C | -5.1034278 | 3.8851852  | -0.5560124 |
| C | -5.2425848 | 4.6496987  | 0.6249222  |
| H | -4.5500844 | 4.4733700  | 1.4638458  |
| C | -6.2547857 | 5.6100750  | 0.7408657  |
| H | -6.3631406 | 6.1927204  | 1.6698007  |
| C | -7.1468565 | 5.8220710  | -0.3277801 |
| C | -8.2385115 | 6.8539954  | -0.1688480 |
| C | -7.0134559 | 5.0794918  | -1.5123812 |
| H | -7.7067377 | 5.2543872  | -2.3487582 |
| C | -5.9969094 | 4.1197425  | -1.6234994 |
| H | -5.8893419 | 3.5359610  | -2.5517592 |
| C | 1.9276642  | 3.8260053  | -0.7243400 |
| C | 2.3116755  | 4.2062783  | 0.5802810  |
| H | 1.8182348  | 3.7316245  | 1.4440062  |
| C | 3.3211979  | 5.1560155  | 0.7746802  |
| H | 3.6326612  | 5.4328723  | 1.7934464  |
| C | 3.9684390  | 5.7278666  | -0.3358457 |
| C | 5.1130444  | 6.6824520  | -0.0933116 |
| C | 3.5898246  | 5.3634695  | -1.6377001 |
| H | 4.1007114  | 5.8129524  | -2.5023961 |
| C | 2.5702938  | 4.4182085  | -1.8292088 |
| H | 2.2697397  | 4.1260069  | -2.8481733 |
| C | -5.1315267 | -3.1334254 | -0.8776854 |
| C | -5.9100656 | -3.3058557 | 0.2905951  |
| H | -5.7490625 | -2.6304949 | 1.1458465  |
| C | -6.8679313 | -4.3232156 | 0.3715247  |
| H | -7.4582240 | -4.4578233 | 1.2920776  |
| C | -7.0674416 | -5.1873756 | -0.7221549 |
| C | -8.0970576 | -6.2858044 | -0.6004229 |
| C | -6.3183547 | -5.0160858 | -1.8978830 |
| H | -6.4865911 | -5.6841991 | -2.7559523 |
| C | -5.3603161 | -3.9943251 | -1.9731328 |
| H | -4.7730038 | -3.8573194 | -2.8952852 |
| C | 1.8850104  | -3.1483375 | -1.3603278 |
| C | 1.9980642  | -4.0482745 | -0.2682772 |
| H | 1.2540681  | -4.0160325 | 0.5465604  |
| C | 3.0263267  | -4.9961007 | -0.2085663 |
| H | 3.1018519  | -5.6791816 | 0.6526629  |
| C | 3.9741222  | -5.0645184 | -1.2456110 |
| C | 5.1047511  | -6.0587023 | -1.1253538 |
| C | 3.8613890  | -4.2072600 | -2.3513321 |
| H | 4.5966430  | -4.2715712 | -3.1667336 |
| C | 2.8234005  | -3.2672052 | -2.4095568 |
| H | 2.7320896  | -2.6086696 | -3.2875866 |
| C | 5.8123121  | 2.4567035  | 0.8686016  |
| C | 6.9441628  | -2.3325097 | -0.2783545 |
| F | -8.1342028 | -7.0828724 | -1.6944840 |
| F | -9.3442200 | -5.7767478 | -0.4238905 |
| F | -7.8424073 | -7.0783977 | 0.4741172  |
| F | 5.9146897  | -6.0562097 | -2.2063904 |
| F | 4.6286134  | -7.3232316 | -0.9708125 |
| F | 5.8671823  | -5.7926324 | -0.0337255 |
| F | -7.7210596 | 8.0955695  | 0.0214218  |
| F | -9.0143153 | 6.5832198  | 0.9137137  |
| F | 6.1213656  | 6.0701799  | 0.5837449  |
| F | 4.7283333  | 7.7458212  | 0.6602820  |
| F | -9.0538625 | 6.9144046  | -1.2488016 |
| F | 5.6361672  | 7.1693904  | -1.2441809 |
| F | 7.1450818  | 2.6753630  | 0.9329247  |
| F | 5.2315871  | 3.1248151  | 1.8916486  |
| F | 5.3714371  | 3.0267550  | -0.2913980 |
| F | 8.1345562  | -1.8119143 | -0.6521961 |
| F | 6.4047565  | -2.9343864 | -1.3782811 |
| F | 7.1847220  | -3.3098653 | 0.6259079  |

## 7. References

- [1] Konrad, N.; Meniailava, D.; Osadchuk, I.; Adamson, J.; Hasan, M.; Clot, E.; Aav, R.; Borovkov, V.; Kananovich, D. *J. Porphyr. Phthalocyanines* **2019**, *24*, 840–849.
- [2] NSD On-line Tool <https://www.kingsbury.id.au/nsd> (accessed Apr 28, 2021).
- [3] Kingsbury, C.J.; Senge, M.O. *Coord. Chem. Rev.* **2021**, *431*, 213760.
- [4] Jentzen, W.; Song, X.Z.; Shelnutt, J.A. *J. Phys. Chem. B* **1997**, *101*, 1684–1699.
- [5] Lehnher, D.; Ford, D. D.; Bendel-Smith, A. J.; Kennedy, C. R.; Jacobsen, E. N. *Org. Lett.* **2016**, *18*, 3214–3217.
- [6] Nogales, D. F.; Ma, J.-S.; Lightner, D. A. *Tetrahedron* **1993**, *49*, 2361–2372.
- [7] Király, P.; Soós, T.; Varga, S.; Vakulya, B.; Tárkányi, G. *Magn. Reson. Chem.* **2010**, *48*, 13–19.
- [8] Tárkányi, G.; Király, P.; Soós, T.; Varga, S. *Chem. Eur. J.* **2012**, *18*, 1918–1922.
- [9] Obrzud, M.; Rospenk, M.; Koll, A. *J. Phys. Chem. B* **2010**, *114*, 15905–15912.
- [10] Johnson, E. R.; Keinan, S.; Mori-Sánchez, P.; Contreras-García, J.; Cohen, A. J.; Yang, W. *J. Am. Chem. Soc.* **2010**, *132*, 6498–6506.
- [11] Hayashi, S.; Sugibayashi, Y.; Nakanishi, W. *RSC Adv.* **2016**, *6*, 49651–49660.
- [12] a) Majerz, I.; Dziembowska, T. *J. Phys. Chem. A* **2016**, *120*, 8138–8147. b) Majerz, I.; Dziembowska, *Mol Divers* **2020**, *24*, 11–20.
- [13] Bader, R. F. W.; Essén, H. *J. Chem. Phys.* **1983**, *80*, 1943–1960.
